1 **Single cell resolution regulatory landscape of the mouse kidney highlights cellular**  
2 **differentiation programs and renal disease targets**

3

4 Zhen Miao<sup>1,2,3,#</sup>, Michael S. Balzer<sup>1,2,#</sup>, Ziyuan Ma<sup>1,2</sup>, Hongbo Liu<sup>1,2</sup>, Junnan Wu<sup>1,2</sup>, Rojesh  
5 Shrestha<sup>1,2</sup>, Tamas Aranyi<sup>1,2</sup>, Amy Kwan<sup>4</sup>, Ayano Kondo<sup>4</sup>, Marco Pontoglio<sup>5</sup>, Junhyong Kim<sup>6</sup>,  
6 Mingyao Li<sup>7</sup>, Klaus H. Kaestner<sup>2,4</sup> and Katalin Susztak<sup>1,2,4,\*</sup>

7

8

9 <sup>1</sup>Renal, Electrolyte, and Hypertension Division, Department of Medicine, University of  
10 Pennsylvania, Perelman School of Medicine, Philadelphia, PA 19104, USA

11 <sup>2</sup>Institute for Diabetes, Obesity, and Metabolism, University of Pennsylvania, Perelman School of  
12 Medicine, Philadelphia, PA 19104, USA

13 <sup>3</sup>Graduate Group in Genomics and Computational Biology, University of Pennsylvania, Perelman  
14 School of Medicine, Philadelphia, PA 19104, USA

15 <sup>4</sup>Department of Genetics, University of Pennsylvania, Perelman School of Medicine,  
16 Philadelphia, PA 19104, USA

17 <sup>5</sup>Epigenetics and Development Laboratory, Université de Paris Inserm U1151/CNRS UMR  
18 8253, Institut Necker Enfants Malades, Paris, France

19 <sup>6</sup>Department of Biology, University of Pennsylvania, Philadelphia, PA 19104, USA

20 <sup>7</sup>Department of Epidemiology and Biostatistics, University of Pennsylvania, Perelman School of  
21 Medicine, Philadelphia, PA 19104, USA

22 #Contributed equally

23 \*Corresponding author

24

25 **Correspondence:**

26 **Katalin Susztak, MD, PhD**

27 Professor of Medicine

28 University of Pennsylvania, Perelman School of Medicine

29 3400 Civic Center Blvd,

30 Smilow Translational building 12-123,

31 Philadelphia, PA 19104

32 Phone: (215) 898-2009

33 [ksusztak@penncmedicine.upenn.edu](mailto:ksusztak@penncmedicine.upenn.edu)

34 **Abstract**

35 Determining the epigenetic program that generates unique cell types in the kidney is critical for  
36 understanding cell-type heterogeneity during tissue homeostasis and injury response.

37

38 Here, we profiled open chromatin and gene expression in developing and adult mouse kidneys at  
39 single cell resolution. We show critical reliance of gene expression on distal regulatory elements  
40 (enhancers). We define key cell type-specific transcription factors and major gene-regulatory  
41 circuits for kidney cells. Dynamic chromatin and expression changes during nephron progenitor  
42 differentiation demonstrated that podocyte commitment occurs early and is associated with  
43 sustained *Foxl1* expression. Renal tubule cells followed a more complex differentiation, where  
44 *Hfn4a* was associated with proximal and *Tfap2b* with distal fate. Mapping single nucleotide  
45 variants associated with human kidney disease identified critical cell types, developmental stages,  
46 genes, and regulatory mechanisms.

47

48 We provide a global single cell resolution view of chromatin accessibility of kidney development.  
49 The dataset is available via interactive public websites.

50

51

52 **Keywords**

53 Kidney development; differentiation; single cell; chromatin accessibility; transcription factor;  
54 gene regulatory network; cis-regulatory elements; enhancer; kidney disease.

## 55 Introduction

56

57 The mammalian kidney maintains fluid, electrolyte, and metabolite balance of the body and plays  
58 an essential role in blood pressure regulation and red blood cell homeostasis. The human kidney  
59 makes roughly 180 liters of primary filtrate each day that is then reabsorbed and modified by a  
60 long tubule segment. To perform this highly choreographed and sophisticated function, the kidney  
61 contains close to 20 highly specialized epithelial cells. The renal glomerulus acts as a 60 kD size-  
62 selective filter. The proximal part of the tubules is responsible for reclaiming more than 70% of  
63 the primary filtrate, which is done via unregulated active and passive paracellular transport <sup>1</sup>, while  
64 the loop of Henle plays an important role in concentrating the urine. The distal convoluted tubule  
65 is critical for regulated electrogenic sodium reabsorption and potassium secretion. The last  
66 segment of kidney tubules is the collecting duct where the final concentration of the urine is  
67 determined via regulation of water channels as well as acid or base secretion. Understanding the  
68 development of these diverse cell types in the kidney is essential to understand kidney homeostasis,  
69 disease, and regeneration.

70

71 The mammalian kidney develops from the intermediate mesoderm via a complex interaction  
72 between the ureteric bud and the metanephric mesenchyme <sup>2</sup>. In the mouse kidney, Six2 marks the  
73 self-renewing nephron progenitor population <sup>3</sup>. The nephron progenitors commit and undergo a  
74 mesenchymal-to-epithelial transformation giving rise to the renal vesicle <sup>3</sup>. The renal vesicle then  
75 undergoes segmentation and elongation, giving rise to epithelia from the podocytes to the distal  
76 convoluted tubules, while the ureteric bud becomes the collecting duct. Unbiased and hypothesis-  
77 driven studies have highlighted critical stages and drivers of early kidney development <sup>4</sup>, that have  
78 been essential for the development of *in vitro* kidney organoid differentiation protocols <sup>5-7</sup>.  
79 However, cells in organoids are still poorly differentiated, improving cellular differentiation and  
80 maturation of these structures remains a major challenge <sup>8</sup>. Thus, the understanding of late kidney  
81 development, especially the cell type-specific driver transcription factors (TFs) is of great  
82 importance <sup>9-11</sup>. Alteration in Wnt, Notch, Bmp, and Egf signaling significantly impacts cellular  
83 differentiation, but only a handful of TFs that directly drive the differentiation of distinct segments  
84 have been identified, such as *Pou3f3*, *Lhx1*, *Irx2*, *Foxc2*, and *Mafb* <sup>12</sup>. Further understanding of the  
85 terminal differentiation program could aid the understanding of kidney disease development.

86

87 While single cell RNA sequencing (scRNA-seq) has improved our understanding of kidney  
88 development in mice and humans<sup>9,10,13,14</sup>, it provides limited information of TFs, which are usually  
89 lowly expressed. Equally difficult is to understand how genes are regulated from scRNA-seq data  
90 alone. Chromatin state profiles, on the other hand, provide valuable insight to gene regulation  
91 mechanisms during cell differentiation, since they show not only the accessibility of the gene  
92 transcription start site (TSS), but also of distal regulatory regions such as enhancers. It is believed  
93 that enhancers are critical for establishing the cell type-specific gene expression pattern, but it has  
94 not been shown conclusively on a single cell level. Together with gene expression, open chromatin  
95 profiles can define the gene regulatory logic, which is the fundamental element of cell identity.  
96 However, there is a scarcity of open chromatin information by Assay for Transposase-Accessible  
97 Chromatin using sequencing (ATAC-seq) or chromatin immunoprecipitation (ChIP) data by ChIP-  
98 seq related to kidney development. In addition, epigenetic changes observed in bulk analyses  
99 mostly represent changes in cell composition, rather than cell type-specific changes<sup>15</sup>, making it  
100 challenging to interpret bulk ATAC-seq data.

101

102 To this end, here we generated a single cell open chromatin and corresponding expression survey  
103 for the developing and adult mouse kidney, which will be available for the community via a  
104 searchable website ([susztaklab.com/developing\\_adult\\_kidney/snATAC/](https://susztaklab.com/developing_adult_kidney/snATAC/) for snATAC-seq data,  
105 [susztaklab.com/developing\\_adult\\_kidney/scRNA/](https://susztaklab.com/developing_adult_kidney/scRNA/) for scRNA-seq data, and  
106 [susztaklab.com/developing\\_adult\\_kidney/igv/](https://susztaklab.com/developing_adult_kidney/igv/) for IGV view of peak tracks). Using this atlas, we  
107 have produced a new epigenome-based classification of developing and mature cells and defined  
108 cell type-specific regulatory networks. We also investigated key TFs and cell-cell interactions  
109 associated with developmental cellular transitions. Finally, we used the single cell open chromatin  
110 information to pinpoint putative target genes and cell types of several chronic kidney disease  
111 noncoding genome-wide association study (GWAS) loci.



112 **Results**

113

114 **Single cell accessible chromatin landscape of the developing and adult mouse kidneys**

115

116 To characterize the accessible chromatin landscape of the developing and adult mouse kidneys at  
117 single cell resolution, we performed single nuclei ATAC-seq (snATAC-seq) on kidneys of mice  
118 on postnatal day 0 (P0) at 3 and 8 weeks of age (**Figure 1a, Methods**). In parallel, we also  
119 performed bulk (whole kidney) ATAC-seq analysis at matched developmental stages. Following  
120 sequencing, we aggregated all high-quality mapped reads in each sample irrespective of barcode.  
121 The combined snATAC-seq dataset from all samples showed the expected insert size periodicity  
122 (**Figure S1a**) with a strong enrichment of signal at Transcription Start Sites (TSS, **Figure S1b**),  
123 indicating high data quality. The snATAC-seq data showed high concordance with the bulk ATAC  
124 data (Spearman correlation coefficient  $>0.84$ , **Methods, Figure S1c**).

125

126 We next revealed cell type annotations from the open chromatin information. After conducting  
127 stringent filtering of the number of barcodes, promoter ratio and mitochondria ratio (**Methods,**  
128 **Figure S1d**), we kept 28,316 cells across the samples (**Figures 1b, S1f-g**). Cells were then  
129 clustered using snapATAC<sup>16</sup>, which binned the whole genome into 5 kb regions and used diffusion  
130 map and principal component analysis for dimension reduction (**Methods**). Prior to clustering, we  
131 used Harmony<sup>17</sup>, an iterative batch correction method, to correct for variability across samples.  
132 Using batch-corrected low dimensional embeddings, we clustered all cells together and retained  
133 13 clusters, all of which had consistent representation across the number of peaks, samples and  
134 read depth profiles (**Figures 1b, S1e-g**). As expected, some clusters such as nephron progenitors  
135 and stromal cells were enriched in the developing kidney (P0).

136

137 In order to identify the cell type-specific open chromatin regions, we conducted peak calling using  
138 MACS2<sup>18</sup> on each cell type separately. The peaks were then merged to obtain a comprehensive  
139 open chromatin set. We found that the single nuclei open chromatin set showed good concordance  
140 with bulk ATAC-seq samples, with most of the peaks in bulk ATAC-seq data captured by the  
141 single nuclei data. On the other hand, single nuclei chromatin accessibility data showed roughly  
142 50% more accessible chromatin peaks (total of 300,693 peaks) than the bulk ATAC-seq data

143 (Figure 1e, Methods), indicating that the snATAC-seq data was particularly powerful in  
144 identifying open chromatin areas that are accessible in single cell types.

145

146 To determine the cell types represented by each cluster, we examined chromatin accessibility  
147 around the TSS and gene body regions of the cognate known cell type-specific marker genes<sup>19</sup>.  
148 Based on the accessibility of the known marker genes, we identified clusters representing nephron  
149 progenitors, endothelial cells, podocytes, proximal tubule segment 1 and segment 3 cells, loop of  
150 Henle, distal convoluted tubule, connecting tubule, collecting duct principal cells, collecting duct  
151 intercalated cells, stromal and immune cells (Figure 1b). Figures 1d and S1h show chromatin  
152 accessibility information for key cell type marker genes, such as *Uncx* and *Cited1* for nephron  
153 progenitors, *Nphs1* and *Nphs2* for podocytes, *Akr1c21* for both segments of proximal tubules,  
154 *Slc34a1* and *Slc5a2* for segment 1 of proximal tubules, *Kap* for segment 3 of proximal tubules,  
155 *Slc12a1* and *Umod* for loop of Henle, *Slc12a3* and *Pvalb* for distal convoluted tubule, *Trpv5* for  
156 connecting tubule, *Aqp2* and *Fxyd4* for principal cells, *Atp6v1g3* and *Atp6v0d2* for intercalated  
157 cells, *Egfl7* for endothelial cells, *Clqb* for immune cells and *Col3a1* for different types of stromal  
158 cells, respectively<sup>19</sup>.

159

160 To understand cell type-specific gene expression changes, we also generated a single cell RNA  
161 sequencing (scRNA-seq) atlas for mouse kidney samples at the same developmental stages. The  
162 single cell transcriptome profiles of P0 and adult mouse kidneys were derived and processed as  
163 described in Methods. Rigorous quality control yielded a set of 43,636 single cells (Figures 1b,  
164 S1i). Quality control metrics such as gene counts, UMI counts and mitochondrial gene percentage  
165 along with batch correction results are shown in Figures S1j-m. By unbiased clustering<sup>20</sup> we  
166 obtained 17 distinct cell populations in the combined P0 and adult mouse datasets (Figure S1i).  
167 On the basis of marker gene expression, we identified kidney epithelial, immune and endothelial  
168 cells (Figures 1f, S1n-o), closely resembling the clustering obtained from snATAC-seq analysis.  
169 We then conducted differential expression analysis on the clusters and identified key marker genes  
170 for each cell type (Supplemental Table 1).

171

172 To compare the consistency between cluster assignment in the snATAC-seq data and the scRNA-  
173 seq data, we next derived a gene activity score for the top 3,000 highly variable genes in each

174 snATAC-seq cluster and computed the Pearson's correlation coefficient between each snATAC  
175 cluster and scRNA cluster (**Methods**). This analysis indicated good concordance between the two  
176 datasets (**Figures 1g, S1p**). While the correlation between gene expression and inferred gene  
177 activity score was high, we noted some differences in cell proportions, which was mostly related  
178 to the sample preparation-induced cell drop-out (**Figures S1g, i**). Consistent with previous  
179 observations that single cell preparations better capture immune cells than single nuclear  
180 preparations<sup>21</sup>, we noted that the immune cell repertoire was limited in the snATAC-seq dataset;  
181 on the other hand, stromal cells were better captured by the nuclear preparation.

182  
183 Finally, to allow the interactive use of this dataset by the community, we not only made the raw  
184 data available but also the processed dataset via our searchable website  
185 ([susztaklab.com/developing\\_adult\\_kidney/snATAC/](https://susztaklab.com/developing_adult_kidney/snATAC/) for snATAC-seq data,  
186 [susztaklab.com/developing\\_adult\\_kidney/scRNA/](https://susztaklab.com/developing_adult_kidney/scRNA/) for scRNA-seq data, and  
187 [susztaklab.com/developing\\_adult\\_kidney/igv/](https://susztaklab.com/developing_adult_kidney/igv/) for IGV view of peak tracks). For example, here we  
188 show the chromatin accessibility landscape of *Ace2*, which is of major interest currently due to the  
189 COVID19 epidemic. We can observe an open chromatin region around the transcription start site  
190 of *Ace2* only in proximal tubules, which is consistent with its expression in proximal tubules  
191 (**Figure S1q**).

192

### 193 **Characterization of the cell type-specific regulatory landscape**

194

195 To characterize different genomic elements captured by snATAC-seq data, we first stratified the  
196 genome into promoters, exons, 5' and 3' untranslated regions, introns, and distal regions using the  
197 GENCODE annotation<sup>22</sup> (**Methods**). We noticed that concordant with bulk ATAC-seq data, most  
198 peaks in snATAC-seq data were in regions characterized as distal elements or introns, (**Figure**  
199 **S2a**) and relatively small portions (<10%) were in promoter or 5' untranslated regions. The  
200 genomic elements proportion was stable across developmental stages. In addition, almost half of  
201 the open chromatin peaks overlapped with P0 or adult H3K27Ac ChIP-seq signals (**Figure S2b**),  
202 indicating the contribution of enhancer regions to accessible chromatin.

203

204 To study the open chromatin heterogeneity in different cell types, we derived a cell type-specific  
205 accessible chromatin landscape by conducting pairwise Fisher's exact test for each peak between  
206 every cluster (Benjamini-Hochberg adjusted  $q$  value  $\leq 0.05$ , **Methods**). In total, we identified  
207 60,684 differentially accessible open chromatin peaks (DAPs) across the 13 cell types  
208 (**Supplemental Table 2, Figure 2a**). Among these peaks, most showed high specificity for a single  
209 cluster. However, we noticed overlaps between the S1 and S3 proximal tubule segments-specific  
210 peaks, as well as between the loop of Henle and distal convoluted tubule segments, which is  
211 consistent with their biological similarities. In addition to the cell type-specific peaks, we also  
212 found some cell-type independent open chromatin areas (present across nephron progenitors,  
213 podocytes, proximal tubule and loop of Henle cells), likely consist of basal housekeeping genes  
214 and regulatory elements. (**Figures 2a, S2c**).

215

216 We noticed that many genes had strong cell type-specific DAPs at their TSS. Other genes, however,  
217 had accessible chromatin at their TSS in multiple cell types. For example, *Umod*, the loop of  
218 Henle-specific marker gene, showed accessible chromatin at its TSS at multiple tubule cell types  
219 (**Figure S2d, S1h**). Rather than with its TSS, cell type-specific chromatin accessibility of *Umod*  
220 strongly correlated with an upstream open chromatin peak, which is likely an enhancer region,  
221 indicated by the H3K27Ac ChIP-seq signal (**Figure S2d**). In addition, we noticed the enrichment  
222 of intronic regions and distal elements (**Figures S2e-f**) in cell type-specific DAPs, indicating their  
223 role in cell type-specific gene regulation.

224

225 These observations motivated us to study cis-regulatory elements using the snATAC-seq data and  
226 scRNA-seq data. We reasoned that a subset of the cell type-specific cis-regulatory elements should  
227 regulate cell type-specific gene expression in cis. Inspired by Zhu et al.<sup>23</sup>, we aligned DAPs and  
228 differentially expressed genes from our snATAC-seq and scRNA-seq datasets, and inferred the  
229 putative regulatory peaks by their proximity (**Methods**). Such cis-regulatory elements predictions  
230 were confirmed by comparing with cis-regulatory elements inferred previously<sup>24</sup>, as we  
231 recapitulated roughly 20% of elements from their analysis. In addition, our analysis was able to  
232 identify several known enhancers such as for *Six2* and *Slc6a18*<sup>24,25</sup> (**Figure S2g**).

233

234 To quantify the contribution of cis-regulatory elements, we analyzed peak co-accessibility patterns  
235 using Cicero<sup>26</sup>. By using a heuristic co-accessible score 0.4 as a cutoff, we identified 232,380 and  
236 206,701 cis-regulatory element links in the P0 and adult data, respectively. Some of these are likely  
237 promoter-enhancer regulatory units. Among these co-accessible elements, only 74,694 were  
238 common in P0 and adult kidneys, while most were developmental stage-dependent. While this  
239 observation needs further experimental validation, it highlights dynamic changes in gene  
240 regulation during development.

241  
242 Another long-standing question has been to define the range of distances between interacting cis  
243 regulatory elements (such as enhancer-enhancer or enhancer-promoter). To this end, we explored  
244 the distances between co-accessible peaks using the Cicero output. We found that the number of  
245 co-accessible peaks decreased with increasing distance between open chromatin regions (**Figure**  
246 **2b**). 43% of the co-accessible peaks were within 100 kb distance, however, the strength of  
247 association did not diminish with increasing distance. Even peaks that were as far as 500 kb apart  
248 showed high (0.8) co-accessibility scores (**Figure 2c**). Overall, the median distance between cis  
249 regulatory elements was relatively large (125.4 kb) and the number of interactions decreased with  
250 increasing distance, however, the strength of association did not change with increasing distance.

251  
252 Given the complex interaction between genomic regions, we next looked into identifying key TFs  
253 that occupy the cell type-specific open chromatin regions. Until now, information on cell type-  
254 specific TFs in the kidney has been scarce. Therefore, we performed motif enrichment analysis on  
255 the cell type-specific open chromatin regions using HOMER<sup>27</sup>. HOMER was designed as a  
256 differential motif discovery algorithm that scores motifs by computing enrichment of motif  
257 sequences in target compared to a reference set. To reduce false discovery, we focused on the  
258 known motifs. The full list of cell type-specific TF binding motifs is shown in **Supplemental**  
259 **Table 3**. Since several TFs have identical or similar binding sequences, we next correlated motif  
260 enrichment with scRNA-seq TF expression. Using this combined motif enrichment and gene  
261 expression approach, we have defined the mouse kidney cell type-specific TF landscape. Examples  
262 include *Six2* and *Hoxc9* in nephron progenitors, *Wtl* and *Mafb* in podocytes, *Hnf4a*, *Ppara*, and  
263 *Bhle1* in proximal tubules, *Esrrb* and *Foxa1* in loop of Henle, *Vdr* in distal convoluted tubule,

264 *Elf5* in principal cells, *Tcfcp2l1* in intercalated cells, *Erg* and *Sox17* in endothelial cells, *Spi1* and  
265 *Batf* in immune cells, and *Twist1* and *Nr2f2* in stromal cells (**Figures 2a, S2h**).

266

267 In order to study the putative target genes of TFs, we examined TF regulon activity using Single-  
268 Cell rEgulatory Network Inference and Clustering (SCENIC)<sup>28</sup>. SCENIC was designed to reveal  
269 TF-centered gene co-expression networks. By inferring a gene correlation network followed by  
270 motif-based filtration, SCENIC keeps only potential direct targets of each TF as modules  
271 (regulons). The activity of each regulon in each cell was quantified and then binarized to “on” or  
272 “off” based on activity distribution across cells (**Methods**). SCENIC was also able to conduct  
273 clustering based on the regulon states of each cell. SCENIC results (**Figures 2d-f**) indicated strong  
274 enrichment in *Trps1*, *Hnflb*, *Maf*, *Hnfla*, and *Hnf4a* regulon activity in proximal tubules, *Hmga2*,  
275 *Hoxc6*, *Hoxd11*, *Meox1*, *Six2*, *Tcf4*, and *Uncx* in nephron progenitors, *Esrrg*, and *Ppargc1a* in loop  
276 of Henle, *Hmgb3* in proliferating cells and *Foxc1*, *Foxc2*, *Foxd1*, *Lef1*, and *Mafb* in podocytes,  
277 respectively. While the expression of several of these TFs was relatively low and was further  
278 exacerbated by transcript drop-outs, many TFs did not show strong cell type enrichment. The  
279 regulon-based analysis, however, showed a very clear enrichment. SCENIC also successfully  
280 reported multiple downstream target genes. The full list of regulons and their respective target  
281 genes can be found in **Supplemental Table 4**, scaled and binarized regulon activity is also  
282 available in **Supplemental Table 5**. Examples of regulon activity, corresponding TF expression,  
283 and target gene expression are depicted in **Figures 2f, S2i**. For example, TFs such as *Eya1*, *Hoxc8*,  
284 *Hoxc9*, *Pax2*, *Spock2* and *Wnt4* are important downstream targets within the regulon of nephron  
285 progenitor-specific TF *Uncx*, indicating an important transcriptional hierarchy of nephron  
286 development<sup>29</sup>. Finally, comparing the number of cell type-specific TFs reported by HOMER and  
287 SCENIC to the number of cell type-specific TFs among DEGs from RNA expression data, it  
288 became evident that cis-regulatory analysis in both snATAC-seq and scRNA-seq datasets yielded  
289 significant benefits in discovering the TF-regulatory network over analyzing transcript data alone  
290 (**Figures S2j-k**).

291

292 In summary, we generated a comprehensive atlas for the cell type-specific regulatory elements and  
293 TF-centered regulatory network.

294



## 295 **The regulatory trajectory of nephron progenitor differentiation**

296

297 All cells in the body differentiate from the same genetic template. Cell type-specific chromatin  
298 opening and closing events associated with TF binding changes set up the cell type-specific  
299 regulatory landscape resulting in cell type specification and development. We found that closing  
300 of open chromatin regions was the predominant event during the nephron progenitor  
301 differentiation (**Figure S2a**). We then evaluated the cellular differentiation trajectory in the  
302 snATAC-seq and scRNA-seq datasets (**Methods**). We identified multiple nephron progenitor sub-  
303 groups (**Figures 3a-b**), which will need to be carefully mapped to prior gene expression- and  
304 anatomical location-driven nephron progenitor sub-classification. Consistently, across both data  
305 modalities, we identified that the podocyte precursors differentiated early from the nephron  
306 progenitor pool (**Figures 3a-b**). The tubule cell trajectory was more complex with a shared  
307 intermediate stage and later differentiation into proximal tubules and distal tubules/loop of Henle  
308 (**Figures 3a-b, S3a-c**). We also integrated snATAC-seq and scRNA-seq data to obtain a single  
309 trajectory (**Methods**). The cell types in this dataset were correctly mapped and the trajectory  
310 resembled the path observed in individual analyses of the scRNA and snATAC datasets (**Figures**  
311 **S3e-g**). The robustness of developmental trajectories was further supported by obtaining similar  
312 results when performing RNA velocity analysis using Velocyto<sup>30</sup> (**Figure S3d**) and by comparing  
313 with previous human and mouse kidney developmental studies<sup>9,13,14</sup>.

314

315 Building on both the SCENIC-generated gene regulatory network and the robust differentiation  
316 trajectories of the snATAC-seq and scRNA-seq datasets, we next aimed to understand chromatin  
317 dynamics, identify TFs and driver pathways for cell type specification and differentiation. To this  
318 end, we first determined variation in chromatin accessibility along the 3 differentiation trajectories  
319 using ChromVAR<sup>31</sup>. ChromVAR estimates the accessibility dynamics of motifs in snATAC-seq  
320 data (**Methods**). We observed three different patterns when analyzing genes of interest (**Figure**  
321 **3c**): 1) *Decrease of TF motif accessibility in all lineages*. For example, *Sox11* motif enrichment  
322 score was high in nephron progenitor cells at the beginning of all 3 trajectories. It then decreased  
323 in all 3 lineages in parallel, underlining the role of *Sox11* in early kidney development. Several  
324 other TFs followed this pattern such as *Six2* and *Sox9*. 2) *Cell type-specific maintenance of*  
325 *chromatin accessibility with advancing differentiation*. We observed that chromatin accessibility

326 for the *Wtl* motif was high initially but declined in proximal tubule and loop of Henle lineages,  
327 while its expression increased in the podocyte lineage. This is consistent with the important role  
328 of *Wtl* in nephron progenitors and podocytes<sup>32,33</sup>. Other TFs that followed this pattern include  
329 *Foxc2* and *Foxl1*. 3) *A de novo increase in chromatin accessibility with cell type commitment and*  
330 *advancing differentiation*. For example, the chromatin accessibility of *Hnf4a* and *Pou3f3* motif  
331 increased in proximal tubule and loop of Henle trajectories, respectively, coinciding with the  
332 cellular differentiation program<sup>34</sup>. A large number of TFs followed this pattern such as *Mafb* (in  
333 podocytes), *Hnf4a* and *Hnf1a* (in proximal tubule), *Hnf1b* (in both proximal tubule and loop of  
334 Henle) as well as *Esrrb* and *Tfap2b* (in loop of Henle).

335

336 Next, we correlated changes in chromatin accessibility-based TF motif enrichment with TF  
337 expression and their respective target genes along Monocle-generated trajectories. To this end, we  
338 used the scRNA-seq differentiation trajectories to find TFs and target genes differentially  
339 expressed over pseudotime (**Supplemental Table 6**). We also noticed a good concordance of time-  
340 dependent changes of TF and target gene expression along with TF motif enrichment, including  
341 the lineages for podocytes (e.g., *Foxc2*, *Foxl1*, *Mafb*, *Magi2*, *Nphs1*, *Nphs2*, *Plat*, *Synpo*, *Thsd7a*,  
342 *Wtl*, and *Zbtb7c*), proximal tubule (e.g., *Ace2*, *Atp1a1*, *Dab2*, *Hnf1a*, *Hnf4a*, *Hsd17b2*, *Lrp2*, *Maf*,  
343 *Slc12a3*, *Slc22a12*, *Slc34a1*, and *Wnt9b*), loop of Henle (e.g., *Cyfp2*, *Cytip*, *Esrrb*, *Esrrg*, *Irx1*,  
344 *Irx2*, *Mecom*, *Pla2g4a*, *Pou3f3*, *Ppargc1a*, *Stat3*, *Sytl2*, *Tfap2b*, *Thsd4*, and *Umod*), as well as for  
345 both proximal tubule and loop of Henle (e.g., *Bhlhe40*, *Hnf1b*, and *Tmprss2*), respectively (**Figures**  
346 **3c, S3i**). Most interestingly, we noticed two distinct patterns of how gene expression was related  
347 to chromatin accessibility. While gene expression of TFs increased over pseudotime, its  
348 corresponding motif accessibility either increased in parallel (such as *Hnf4a* and *Pou3f3*) or  
349 maintained in a lineage-specific manner (such as *Wtl*). This might indicate different regulatory  
350 mechanisms during differentiation.

351

352 We next aimed to interrogate the stage-dependent chromatin dynamics along the identified  
353 differentiation trajectory. The differentiation trajectory was binned into 15 developmental steps  
354 based on the lineage specification (**Figures S3b-c**). These stages were labeled as NP (nephron  
355 progenitor), IM (intermediate cells), Podo (podocytes), PT (proximal tubule), LOH (loop of Henle),  
356 and DCT (distal convoluted tubule), however, this designation will need to be matched with prior



357 cell marker-based annotations. To study the chromatin opening and closing, we conducted  
358 differential chromatin accessibility analysis between subsequent stages. To understand the  
359 biological processes controlled by the epigenetic changes, we examined the nearest genes and  
360 performed functional annotation (**Methods**). We found that open chromatin profiles were  
361 relatively stable in the early precursor stages such as NP1 to NP3, with fewer than 70 DAPs  
362 identified (**Supplemental Table 7, Figure S4a**). The podocyte differentiation branch was  
363 associated with marked increase in the number of DAPs, (796 DAPs between NP3 and Podo1).  
364 This mainly represented the closing of chromatin areas around nephron progenitor-specific genes  
365 such as *Osr1*, *Gdnf*, *Sall1*, *Pax2* and opening of areas around podocyte-specific genes and key TFs  
366 such as *Foxc2* and *Efnb2*, both of which are validated to be important for early podocyte  
367 differentiation<sup>35,36</sup>. At later stages, there was a strong increase in expression of actin filament-  
368 based processes and a significant decrease in *Notch* and *Ctnnb1* in the podocyte lineages  
369 (**Supplemental Table 8**). Fewer chromatin closing events were observed (234 DAPs) between  
370 NP3 and intermediate cells 1 (IM1), mainly associated with closing of the chromatin around *Osr1*  
371 and opening around tubule cell-specific TFs such as *Lhx1* and *Pax3* (**Figure 4**). The decrease in  
372 *Six2* expression only occurred at the IM2 stage, at which we also observed an increase in tubule  
373 specification genes such as *Hnfla*. Gene ontology results from the 820 up-regulated peaks between  
374 PT1 and IM2 showed enrichment associated with typical proximal tubule functions including  
375 sodium-dependent phosphate transport, maintenance of osmotic response in the loop of Henle and  
376 active sodium transport in the distal convoluted tubule (**Figure S4a**, the full list can be found in  
377 **Supplemental Tables 7, 8 and 9**).

378  
379 In addition to analyzing changes along the trajectory, we also specifically examined cell-fate  
380 decision events. We studied the chromatin opening and closing during the first cell commitment  
381 event. We found that podocyte specification from nephron progenitors was associated with  
382 differential opening of *Foxl1*, *Zbt7c*, and *Smad2* in the podocyte lineage and *Lhx1*, *Sall1*, *Dll1*,  
383 *Jag1*, *Cxcr3* and *Pax3* in the other lineage, respectively. While the role of several TFs has been  
384 established for podocyte specification, the expression of *Foxl1* has not been described in the kidney  
385 until now (**Figure 4**). Our analysis pinpointed that four peaks in the vicinity of *Foxl1* were  
386 accessible only in podocyte lineage, which locate in +53,381 bp, +152,832 bp, +237,019 bp, and  
387 +268,550 bp of the *Foxl1* TSS, respectively. To confirm the expression of *Foxl1* in nephron

388 progenitors and podocytes, we performed immunofluorescence studies on developing kidneys  
389 (E13.5, P0 and P6). Consistent with the computational analysis, we found strong expression of  
390 FOXL1 in nephron progenitors (E13.5). At later stages, it was present in comma and S shape body  
391 and finally in the glomerular podocytes (**Figure S4b**). While there was no expression within cells  
392 destined to become proximal tubule or loop of Henle cells, gene expression of *Foxl1* increased in  
393 cells along the podocyte trajectory (**Figure S4c**). While further experimental validation will be  
394 important, our study has illustrated the critical role of open chromatin state information and  
395 dynamics in cellular differentiation.

396

397 The intermediate cells (IM) gave rise to proximal and distal branches, representing the proximal  
398 tubules and the loop of Henle as well as distal convoluted tubule segments. The proximal tubule  
399 region was characterized by chromatin opening around *Hnf4a*, *Maf*, *Tprkb*, and *Gpat2*. The loop  
400 of Henle and distal convoluted tubule segments were remarkable for multiple DAPs in the vicinity  
401 of *Tfap2a*, *Tfap2b*, *Cited4*, *Ephb2*, *Ephb3*, *Hoxd8*, *Mecom*, and *Prmd16*, indicating a critical novel  
402 role for these TFs in distal tubule differentiation (**Figures 3c, 4, S4c**). Consistently, we saw a  
403 reduction in chromatin accessibility of *Six2* promoter and enhancers along all three trajectories  
404 (podocyte, proximal tubule and loop of Henle) (**Figure S4d**). There was also a decrease in  
405 expression of *Jag1* and *Heyl* in the distal loop of Henle segment, concordant with the putative role  
406 of Notch driving the proximal tubule fate <sup>37</sup> (**Supplemental Table 11**). Another striking  
407 observation was that tubule segmentation and specification occurred early by an increase in  
408 chromatin accessibility around *Lhx1*, *Hnf1a* and *Hnf4a* and *Maf* for proximal tubule and *Tfap2b*  
409 for loop of Henle. Terminal differentiation of proximal tubule and loop of Henle cells was strongly  
410 linked to nuclear receptors that regulate metabolism, such as *Esrra* and *Ppara* in proximal tubules  
411 and *Esrra* and *Pparg1a* in the loop of Henle segment, once more indicating the critical role of  
412 metabolism of driving gene expression and differentiation <sup>38</sup>.

413

414 In summary, we reconstructed the developmental and differentiation trajectories of podocytes,  
415 proximal tubule and loop of Henle cells. We defined chromatin and gene expression dynamics and  
416 identified numerous putative TFs for kidney cell specification and differentiation.

417

## 418 **Stromal-to-epithelial communication is critical in the developing and adult kidneys**

419

420 Previous studies indicated that the survival, renewal, and differentiation of nephron progenitors is  
421 largely regulated through its cross-talk with the adjacent ureteric bud<sup>39</sup>. To investigate the complex  
422 cellular communication network, we used CellPhoneDB<sup>40</sup> to systematically infer potential cell-  
423 cell communication in the developing and adult kidney. CellPhoneDB provides a comprehensive  
424 database and a statistical method for the identification of ligand-receptor interactions in scRNA-  
425 seq data. Analysis of our scRNA-seq dataset indicated that the number of cell-cell interaction pairs  
426 was larger in developing kidney compared to the adult kidney (**Figure 5a**). In the developing  
427 kidney, the stroma showed the greatest number of interactions among all cell types, coinciding the  
428 well-known role of epithelial-stromal interactions in driving kidney development. Of the identified  
429 interactions, many were related to stroma-secreted molecules such as collagen 1, 3, 4, 6, and 14  
430 (**Figure 5b**). Furthermore, the stroma seemed to interact with most cell types, such as podocytes  
431 and different tubule cells. Interestingly, the nephron progenitor cluster showed important ligand-  
432 receptor interaction between *Fgfl*, *Fgf8* as well as *Fgf9* and the corresponding receptor *Fgfr1*,  
433 which is consistent with the well-known role of FGF signaling in kidney development<sup>41</sup>. Of the  
434 manifold identified interactions in the fetal kidney, stromal interaction and the VEGF-involving  
435 interaction remained significant in the adult data set, underscoring the importance of endothelial-  
436 to-epithelial communication.

437

438 We next individually examined the expression of several key pathways known to play important  
439 roles in kidney development, such as Gdnf-Ret, sonic hedgehog, FGF, Bmp, Wnt and others<sup>9</sup>.  
440 Expression of these key ligand-receptor pairs showed strong cell type specificity (**Figure 5c**). For  
441 example, *Robo2* of the Gdnf-Ret pathway was expressed in nephron progenitors and in podocytes  
442 of P0 and adult kidney. Gdnf signaling through the Ret receptor is required for normal growth of  
443 the ureteric bud during kidney development<sup>42</sup> and the Slit2/Robo2 pathway is implicated with  
444 congenital kidney anomalies<sup>43</sup> and important for maintenance of podocyte foot process integrity  
445<sup>44</sup>. *Eyal*, however, is genetically upstream of *Gdnf* and acts as a positive regulator for its activation  
446<sup>45</sup>. Consistently, we noted distinct cell type specificity of *Eyal* expression only in nephron  
447 progenitors, which was also true for other important signaling molecules such as *Ptchl*, *Smo* and  
448 *Gli3* of the sonic hedgehog pathway. *Fgfr1* showed the highest expression in nephron progenitors

449 as well as in fetal and adult stroma, underscoring the importance of FGF signaling for cell-cell  
450 interactions in both the developing and developed kidney. Most interestingly, some cell-cell  
451 interactions between specific cell types that were observed in fetal kidney were abrogated in adult  
452 kidney because of the loss of expression of either ligand or receptor, such as *Pdgfc* in nephron  
453 progenitor signaling to its receptor *Pdgfra* in stroma, *Npnt* from several epithelial cells signaling  
454 to *Itga8* in nephron progenitors, *Tnc-Itga9* signaling from nephron progenitors to stroma and  
455 *Rspo3* in stroma signaling to *Sdc4* in several epithelial cells. Because not much is known about  
456 some of these markers, the significance of these putative interactions requires further investigation.  
457 For example, *Rspo3* has been implicated in nephron progenitor-associated interactions during  
458 nephrogenesis<sup>10</sup>. Mutations in the *Itga8* gene are known to cause isolated congenital anomalies of  
459 kidney and urinary tract in humans<sup>43</sup> and *Pdgfra* has been regarded as a commitment marker in  
460 kidney differentiation<sup>10</sup>.

461

462 In summary, we inferred cell-cell interactions in the developing and adult kidneys and found the  
463 critical role of stromal-epithelial interactions in the developing kidney.

464

#### 465 **Single cell chromatin accessibility identified human kidney GWAS target regulatory regions,** 466 **genes and cell types**

467

468 Finally, we examined whether single cell level chromatin accessibility data can help identify cell  
469 and gene targets for human kidney disease development. GWAS have been exceedingly successful  
470 in identifying nucleotide variations associated with specific diseases or traits. However, more than  
471 90% of the identified genetic variants are in the non-coding region of the genome. Initial  
472 epigenome annotation studies indicated that GWAS hits are enriched in tissue-specific enhancer  
473 regions. As there are many different cell types in the kidney with differing function, understanding  
474 the true cell type specificity of these enhancers is critically important. Here, we reasoned that  
475 single cell accessible chromatin information could be extremely useful to identify the cell type-  
476 specific enhancer regions and thereby the target cell type for the GWAS hits, however, such maps  
477 have not been generated for the human kidney. We combined three recent kidney disease GWAS  
478<sup>46-48</sup>, and obtained 26,637 single nucleotide polymorphisms (SNPs) that passed genome-wide  
479 significance level of which we retained 7,923 after lift-over from human to mouse.

480

481 By overlapping the kidney disease-associated SNPs with peaks called by snATAC-seq data, we  
482 found highly specific accessibility among different cell types (**Figure S5**). We found that most of  
483 the peaks overlapped with nephron lineages, especially proximal tubules. The full table including  
484 nearest genes is provided in the **Supplemental Table 12**. However, as the causal GWAS variant  
485 is unknown, we conducted further investigation of kidney disease target genes and cell types using  
486 multi-omics mouse kidney data.

487

488 Specifically, we examined loci where functional validation studies reported conflicting results on  
489 target cell types and target genes (**Figure 6**). The *SHROOM3* locus has shown a reproducible  
490 association with kidney function in multiple GWAS <sup>48</sup>. However, previous functional follow-up  
491 studies have reported confusing and somewhat contradictory results. While one study indicated  
492 that the genetic variants were associated with an increase in SHROOM3 levels in tubule cells  
493 inducing kidney fibrosis <sup>49</sup>, the other suggested that the variant was associated with lower  
494 SHROOM3 levels in podocytes resulting in chronic kidney disease development <sup>50</sup>. We found an  
495 open chromatin (likely promoter) area in multiple cell types such as nephron progenitors,  
496 podocytes, loop of Henle, distal convoluted tubule, principal cells and intercalated cells (**Figure**  
497 **6a**). We also identified intronic open chromatin areas only in nephron progenitors and podocytes  
498 that overlapped with the GWAS significant variants (**Figure 6a**). Consistent with the cis-  
499 regulatory open chromatin, the strongest expression of *Shroom3* was observed in podocytes and  
500 nephron progenitor cells. Expression of *Shroom3* in the adult bulk kidney was below our detection  
501 limit. To further understand the regulatory dynamics of this locus in the developing mouse kidneys,  
502 we examined gene expression and epigenome annotation data generated from bulk mouse kidney  
503 samples at different stages of development for H3K27ac and H3K4me1 in adult and fetal samples  
504 (**Figure 6b**). Interesting to note that the GWAS-significant SNP that showed strong nephron  
505 progenitor-specific enrichment also coincided with the *Six2* binding area. Finally, the Cicero-based  
506 co-accessible analysis connected the GWAS top variants, which located in an intronic enhancer  
507 region of *Shroom3*, with *Shroom3* exons, indicating that *Shroom3* is the likely target gene of the  
508 variant (**Figure 6a**).

509

510 Next, we analyzed the chromosome 15 GWAS region, where we identified some open chromatin  
511 regions that were uniformly open in all examined cell types. *Dab2* expression, on the other hand,  
512 strongly correlated with open distal enhancer regions in proximal tubule cells (**Figure 6c**). This is  
513 consistent with earlier publications indicating the role of proximal tubule-specific DAB2 playing  
514 a role in kidney disease development <sup>51</sup>. Interestingly, while single cell analysis indicated an  
515 additional distal enhancer in intercalated cells, the GWAS-significant region coincided with the  
516 proximal tubule-specific enhancer region and showed strong coregulation (**Figure 6d**). Regulatory  
517 annotation of the developing kidney indicated strong enhancer marks in the adult but not in the  
518 fetal kidney.

519

520 Lastly, we examined the region around *Uncx*, for which reproducible association with kidney  
521 function was shown in multiple GWAS <sup>46,47</sup>. Interestingly, the GWAS locus demonstrated a strong  
522 open chromatin region in nephron progenitors but not in any other differentiated cell types (**Figure**  
523 **6e**). Consistently, in bulk chromatin accessibility data we only observed regulatory activity such  
524 as H3K27ac, H3Kme1 and we show *Six2*-binding at this locus in fetal kidneys. The locus did not  
525 show H3K27ac enrichment in the adult kidney, while H3K4me1 remained positive (**Figure 6f**).  
526 *Uncx* expression was strong in the fetal kidney samples, but we could not detect its expression in  
527 the adult kidney (**Figure 6e**). A closer view of these loci is shown in **Figure S6**.

528

529 These results indicate that variants associated with kidney disease development are located in  
530 regions with cell type- and developmental stage-specific regulatory activity and illustrate the  
531 critical role of snATAC-seq in defining target genes and target cell types for GWAS variants.

## 532 **Discussion**

533

534 In summary, here we present the first cellular resolution open chromatin map for the developing  
535 and adult mouse kidney. Using this dataset, we identified key cell type-specific regulatory  
536 networks for kidney cells, defined the cellular differentiation trajectory, characterized regulatory  
537 dynamics and identified key driving TFs for nephron development, especially for the terminal  
538 differentiation of epithelial cells. Furthermore, our results shed light on the cell types and target  
539 genes for genetic variants associated with kidney disease development.

540

541 By performing massively parallel single cell profiling of chromatin state, we were able to define  
542 the key regulatory logic for each kidney cell type by investigating cis-regulatory elements and TF-  
543 target gene interaction. We found that most cell type-specific open chromatin regions are within  
544 distal regulatory elements and intronic regions. Our studies identified a massive amount of highly  
545 dynamic co-regulated peaks indicating the important correlation between distal regulatory  
546 elements and gene expression. Future studies will examine the relative contribution of promoters  
547 and enhancer openness in gene expression regulation. However, these studies highlight that both  
548 chromatin opening and looping are critical for gene regulation.

549

550 We also observed that the single cell open chromatin atlas was able to define more distinct cell  
551 types even in the developing kidney compared to scRNA-seq analysis. Given the continuous nature  
552 of RNA expression, it has been exceedingly difficult to dissect specific cell types in the developing  
553 kidney<sup>9,10,13</sup>. In addition, it has been difficult to resolve the cell type origin of lowly expressed  
554 transcripts in scRNA-seq data. However, this is not the case for snATAC-seq data, which were  
555 able to capture the chromatin state irrespective of gene expression magnitude. There were several  
556 examples where accessible peaks were identified in specific cell types even for lowly expressed  
557 genes such as *Shroom3*.

558

559 We identified critical cell type-specific TFs by integrating multiple computational analyses. TF  
560 identification is challenging in scRNA-seq data since the expression of several cell type-specific  
561 TFs is low and some of them do not show a high degree of cell type-specificity<sup>52</sup>. By extracting  
562 motif information, snATAC-seq data provides additional information for TF identification.



563 Together with regulon analysis, as implemented in SCENIC, we have identified several TFs as  
564 well as their target genes that are important for kidney development. Leveraging this newly  
565 identified cell type-specific regulatory network will be essential for future studies of cellular  
566 reprogramming of precursors into specific kidney cell types and for better understanding  
567 homeostatic and maladaptive regeneration.

568

569 Our studies revealed dynamic chromatin accessibility that tracks with renal cell differentiation.  
570 These states may reveal mechanisms governing the establishment of cell fate during development,  
571 in particular those underlying the emergence of specific cell types. We found a consistent and  
572 coherent pattern between gene expression and open chromatin information, where the nephron  
573 progenitors differentiated into two branches representing podocytes and tubule cells<sup>53</sup>. We found  
574 that podocytes commitment occurred earlier, while tubule differentiation and segmentation  
575 appeared to be more complex. This podocyte specification correlated with the maintenance of  
576 expression of *Foxc2* and *Foxl1* expression in podocytes. While *Foxc2* has been known to play a  
577 role in nephron progenitors and podocytes, this is the first description of *Foxl1* in kidney and  
578 podocyte development. Our studies are consistent with recent observations from organoid models  
579 that recapitulated podocyte differentiation better than tubule cell differentiation<sup>54</sup>. Our study also  
580 sheds light on tubule differentiation and segmentation. We confirmed the key role of *Hnf4a* in  
581 proximal tubules. We have identified a large number of new transcriptional regulators such as  
582 *Tfap2a* that seem to be critical for the distal portion of the nephron. Our data indicate that distal  
583 tubule differentiation is linked to the loop of Henle, a critically important observation needing  
584 further confirmation. Furthermore, the terminal differentiation of proximal tubule cells correlated  
585 with the increase in *Ppara* and *Esrra* expression, both of which are known regulators of oxidative  
586 phosphorylation and fatty acid oxidation<sup>38</sup>. Loop of Henle differentiation strongly correlated with  
587 *Essrb* and *Ppargc1a* expression. These studies potentially indicate that cell specification events  
588 occur early and metabolism controls terminal differentiation of tubule cells<sup>55</sup>. Impaired metabolic  
589 fitness of proximal tubules has been a key contributor to kidney dysfunction, explaining the critical  
590 association with tubule metabolism and function.

591

592 Furthermore, we show that single cell and stage level epigenome annotation is critical for the  
593 annotation of human GWAS. Most identified GWAS signals are in the non-coding region of the



594 genome. Due to the linkage disequilibrium structure of the human genome, each GWAS locus  
595 contains a large number of variants, each passing genome-wide significance level <sup>56</sup>. Furthermore,  
596 as these signals are often non-coding, the target gene and the target cell type remain unknown.  
597 While molecular quantitative trait locus studies and bulk epigenome annotation experiments have  
598 been important to define the molecular pathways leading to disease development from the  
599 identified signals, these methods have limited resolution, as cell type-specific enhancer regions  
600 cannot be identified by bulk analysis <sup>57</sup>. Additionally, bulk molecular quantitative trait locus  
601 studies suffer from the same linkage disequilibrium problems as GWAS analyses <sup>58</sup>. Our results  
602 indicate that multiple GWAS regions are conserved between mice and humans. Single cell open  
603 chromatin information enables not only the identification of affected cell types, but also the  
604 understanding of co-regulation of the open chromatin area. It is also able to highlight critical target  
605 genes. Performing single cell open chromatin analysis on human kidney tissue samples will be  
606 essential to further understand molecular pathways altered by genetic variants. Here we showed  
607 three important examples. We confirmed the role of *Dab2* and its specific expression in the  
608 proximal tubule during kidney disease development, as its implication therein has been shown in  
609 previous expression quantitative trait locus and bulk epigenome analysis experiments <sup>51</sup>.  
610 Furthermore, we showed that the GWAS variants map only to those regions where chromatin is  
611 open exclusively in nephron progenitors, whereas chromatin becomes inaccessible as  
612 differentiation progresses during later stages, such as *Shroom3* and *Uncx*. This is an interesting  
613 and important novel mechanism, indicating that the altered expression of this gene might play a  
614 role in the development rewiring of the kidney. This mechanism is similar to genes associated with  
615 autism that are known to be expressed in the fetal but not in the adult stages <sup>59</sup> and highlights the  
616 critical role of understanding chromatin accessibility at multiple stages of differentiation.

617  
618 While we have generated a large amount of high-quality data, this information will need further  
619 experimental validation, which is beyond the scope of the current manuscript. In addition, one  
620 needs to be aware of the limitations when interpreting different computational analyses, for  
621 example, the motif enrichment analyses such as implemented by HOMER, SCENIC, and  
622 chromVAR, are not able to distinguish between TFs with similar binding sites. Future high-  
623 throughput studies that analyze open chromatin and gene expression information from the same

624 cells will be exceedingly helpful to correlate open chromatin and gene expression information  
625 along the differentiation trajectory<sup>24,60,61</sup>.

626

627 In summary, our dataset provides critical novel insight into the cell type-specific gene regulatory  
628 network, cell differentiation program, and disease development.

629

630

### 631 **Acknowledgements**

632 Work in the Susztak lab is supported by the NIH DK076077, DK087635, and DK105821. MSB is  
633 supported by a German Research Foundation grant (BA 6205/2-1).

634

### 635 **Author Contributions**

636 KS and ZM designed and conceived the experiment. ZYM, JW, RS, and TA conducted the  
637 experiment. ZM conducted snATAC-seq bioinformatics analysis with advice from KS, HL, ML,  
638 and JK. MSB and ZM conducted scRNA-seq bioinformatics analysis with advice from KS. AMK  
639 and AYK conducted immunofluorescence staining with supervision from KHK. KS, ZM, and  
640 MSB wrote the manuscript and all authors edited and approved of the final manuscript.

641

### 642 **Declaration of Interests**

643 Authors declare no competing interests.

644 **Figure Legends**

645

646 **Figure 1. snATAC-seq and scRNA-seq identified major cell types in developing and adult**  
647 **mouse kidney.**

648 (A) Schematics of the study design. Kidneys from P0 and adult mice were processed for snATAC-  
649 seq and scRNA-seq followed by data processing and analysis including cell type identification and  
650 peak calling.

651 (B) UMAP embeddings of snATAC-seq data and scRNA-seq data. Using marker genes, cells were  
652 annotated into nephron progenitors (NP), collecting duct intercalated cells (IC), collecting duct  
653 principal cells (PC), proximal tubule segment 1 and 3 (PT S1 and PT S3), loop of Henle (LOH),  
654 distal convoluted tubules (DCT), stromal cells (Stroma), podocytes (Podo), endothelial cells (Endo)  
655 and immune cells (Immune). In scRNA-seq data, the same cell types were identified, with an  
656 additional proliferative population and immune cells were clustered into neutrophils and  
657 macrophages.

658 (C) UMAP embeddings of snATAC-seq and scRNA-seq data colored by P0 and adult batches.

659 (D) Genome browser view of read density in each snATAC-seq cluster at cell type marker gene  
660 transcription start sites. We used *Uncx* for nephron progenitors, *Nphs2* for podocytes, *Akr1c21* for  
661 proximal tubules, *Slc12a1* for loop of Henle, *Slc12a3* for distal convoluted tubule, *Trpv5* for  
662 connecting tubule, *Aqp2* for collecting duct principal cells, *Atp6v1g3* for intercalated cells, *Egfl7*  
663 for endothelial cells, *Clqb* for immune cells and *Col3a1* for stroma. Additional marker gene  
664 examples are shown in **Figure S1h**.

665 (E) Comparison of peaks identified from snATAC-seq data and bulk ATAC-seq data. Peaks that  
666 are identified in both datasets are colored blue, and peaks that are dataset-specific are grey.

667 (F) Violin plots showing cell type-specific gene expression in scRNA-seq data. With the exception  
668 of proximal tubule, the same marker genes as in snATAC-seq data were used (*Slc5a2* and *Slc22a30*  
669 for proximal tubule S1 and S3, respectively).

670 (G) Correlation between snATAC-seq gene activity scores and gene expression values in P0 data.  
671 The correlation of the adult dataset is shown in **Figure S1p**.

672

673 **Figure 2. Cell type-specific gene regulatory landscape of the mouse kidney.**

674 (A) Left panel: Heatmap showing examples of the cell type-specific differentially accessible peaks  
675 (DAPs) (yellow: open chromatin, blue: closed chromatin) (full results are shown in **Supplemental**  
676 **Table 2**). Middle panel: Examples of cell type-specific motif enrichment analysis using Homer.  
677 (full results are shown in **Supplemental Table 3**). Right panel: TF expression z score heatmap  
678 that corresponds to the motif enrichment in each cell type.

679 (B) Histogram showing the distribution of distances between Cicero-inferred correlated peaks in  
680 the P0 samples. The number of co-accessible peaks decreases with increasing distance.

681 (C) Density plot showing the distribution of peak co-accessibility scores and distance between  
682 peaks. Although the number of peaks decreases with increasing distances, the co-accessibility  
683 score distribution remains relatively stable.

684 (D) Regulon activity heatmap. Each column represents a single cell, colored by cluster assignment  
685 and ordered by hierarchical clustering; each row represents binarized regulon activities (“on-  
686 black”, “off-white”) and ordered by hierarchical clustering.

687 (E) tSNE representation of regulon density as a surrogate for stability of regulon states, as inferred  
688 by SCENIC algorithm.

689 (F) tSNE depiction of regulon activity (“on-blue”, “off-grey”) and TF gene expression (red scale)  
690 of exemplary regulons for proximal tubule (*Hnf1a*), nephron progenitors (*Uncx*), loop of Henle  
691 (*Ppargc1a*), proliferating cells (*Hmgb3*) and podocytes (*Mafb*). Examples of target gene  
692 expression of the *Uncx* regulon (*Eye1*, *Hoxc8*, *Pax2*, *Spock2* and *Wnt4*) are shown in purple scale.  
693 Expression of target genes of *Hnf1a*, *Ppargc1a*, *Hmgb3* and *Mafb* is shown in **Figure S3d**.

694

695 **Figure 3. The cellular trajectory of nephron progenitor differentiation.**

696 (A) UMAP representation of snATAC-seq nephron progenitor differentiation trajectory towards  
697 podocytes, proximal tubule, loop of Henle and distal convoluted tubule, respectively, as inferred  
698 by Cicero. Cells are colored by pseudotime.

699 (B) UMAP representation of scRNA-seq nephron progenitor differentiation trajectory towards  
700 podocytes, proximal tubule and loop of Henle, respectively, as inferred by Monocle3. Cells are  
701 colored by pseudotime.

702 (C) Pseudotime-dependent chromatin accessibility and gene expression changes along the  
703 proximal tubule (red), podocyte (green) and loop of Henle (blue) cell lineages. The first column

704 shows the dynamics of chromVAR TF enrichment score, the second column shows the dynamics  
705 of TF gene expression values and the third and fourth column represent the dynamics of SCENIC-  
706 reported target gene expression values of corresponding TFs, respectively. Additional examples  
707 are given in **Figure S3e**.

708

709 **Figure 4. Chromatin dynamics of nephron progenitor differentiation.**

710 Di-graph representing cell type and lineage divergence, as derived from Cicero trajectory inference.  
711 Nephron progenitors (NP), podocytes (Podo), intermediate stage (IM), proximal tubule (PT), loop  
712 of Henle (LOH) and distal convoluted tubule (DCT) are connected with their developmental  
713 precursor stages and represented by ascending numbering. Arrows represent cell differentiation  
714 along respective trajectories. Genes listed next to the trajectories were derived from analyzing gene  
715 enrichment of differentially assessable peaks (DAPs) between two stages. Genes colored red were  
716 derived from the opening DAPs between two stages, genes colored blue were derived from the  
717 closing DAPs between two stages, and genes colored green were derived from opening DAPs  
718 between two branches. Three important genes, *Foxl1*, *Hnf4a* and *Tfap2b* are shown along with  
719 their cell type-specific accessibility peaks and immunostaining results. Peaks that were open  
720 during the development of specific cell types are shown in red boxes. Immunofluorescence  
721 staining of fetal mouse kidney shows FOXL1 in red along cellular differentiation (from right to  
722 left) from early progenitor stage (asterisk) over comma-shaped (+) and S shaped bodies (cross)  
723 towards podocytes within primitive glomeruli (#). HNF4A and TFAP2B in human adult kidney  
724 samples (taken from the Human Protein Atlas, <http://www.proteinatlas.org><sup>62</sup>) are visualized by  
725 immunohistochemistry in brown.

726

727 **Figure 5. Cell-cell communication analysis in the developing and adult mice highlighted the**  
728 **critical role of stroma in driving cell differentiation.**

729 (A) Heatmaps showing the number of cell-cell interactions in the scRNA-seq dataset of P0 (top)  
730 and adult (bottom) kidneys, as inferred by CellPhoneDB. Dark blue and dark red colors denote  
731 low and high numbers of cell-cell interactions, respectively.

732 (B) CellPhoneDB-derived measures of cell-cell interaction scores and p values. Each row shows  
733 a ligand-receptor pair, and each column shows the 2 interacting cell types, which is binned by cell  
734 type. Columns are sub-ordered by first interacting cell type into stroma, podocytes, endothelial

735 cells, proximal tubule, loop of Henle and nephron progenitors. Color scale denotes the mean values  
736 for all the interacting partners, where mean value refers to the total mean of the individual partner  
737 average expression values in the interacting cell type pairs. Orange scale denotes P0, blue scale  
738 denotes adult. Dot size denotes corresponding p values of the permutation test.

739 (C) Dot plots of RNA expression of important cell-cell communication candidates within the Gdnf-  
740 Ret, Sonic hedgehog, Fgf, Bmp, Wnt and other pathways in both P0 (top) and adult (bottom)  
741 kidney. Dot size denotes percentage of cells expressing the marker. Color scale represents average  
742 gene expression values, orange denotes P0, blue denotes adult. Arrows indicate ligand-receptor  
743 pairs.

744

745 **Figure 6. Single cell level chromatin accessibility highlighted human kidney GWAS target**  
746 **genes and cell types.**

747 (A, C, E) From top to bottom: Cicero-inferred co-accessibility of open chromatin regions in mouse  
748 orthologues of human *Shroom3*, *Dab2* and *Uncx* loci; Gene browser view of the single nucleotide  
749 polymorphisms within the regions; gene browser view of chromatin accessibility for nephron  
750 progenitors (NP), collecting duct intercalated cells (IC), collecting duct principal cell types (PC),  
751 proximal tubules segment 1 and 3 (PT S1 and PT S3), loop of Henle (LOH), distal convoluted  
752 tubule (DCT), stromal cells (stroma), podocytes (Podo), endothelial cells (Endo) and immune cells  
753 (Immune). Right subpanel shows violin plots of scRNA-seq gene expression in P0 (orange) and  
754 adult (blue) kidneys.

755 (B, D, F) Whole kidney H3K27ac, H3K4me1 and Six2 ChIP-seq, whole genome bisulfate  
756 sequencing (WGBS) and RNA-seq data in E15.5, P0 and adult kidney samples.

757

758

759 **Methods**

760

761 **Single cell RNA sequencing of P0 mice**

762 1-day-old mouse neonate was decapitated with surgical scissors, 2 kidneys were harvested and  
763 minced into 1 mm<sup>3</sup> pieces and incubated with digestion solution containing Enzyme D, Enzyme R  
764 and Enzyme A from Multi Tissue Dissociation Kit (Miltenyi, 130-110-201) at 37 °C for 15 min  
765 with agitation. Reaction was deactivated by adding 10% FBS, then solution was passed through a  
766 40 µm cell strainer. After centrifugation at 1,000 RPM for 5 min, cell pellet was incubated with  
767 500 µL of RBC lysis buffer on ice for 3 min. We centrifuged the cells at 1,000 RPM for 5 min at  
768 4 °C and resuspended the cells in the buffer for further steps. Cell number and viability were  
769 analyzed using Countess AutoCounter (Invitrogen, C10227). The cell concentration was 2.2  
770 million cells/mL with 92% viability. 10,000 cells were loaded into the Chromium Controller (10X  
771 Genomics, PN-120223) on a Chromium Single Cell B Chip (10X Genomics, PN-120262) and  
772 processed to generate single cell gel beads in the emulsion (GEM) according to the manufacturer's  
773 protocol (10X Genomics, CG000183). The library was generated using the Chromium Single Cell  
774 3' Reagent Kits v3 (10X Genomics, PN-1000092) and Chromium i7 Multiplex Kit (10X Genomics,  
775 PN-120262) according to the manufacturer's manual. Quality control for constructed library was  
776 performed by Agilent Bioanalyzer High Sensitivity DNA kit (Agilent Technologies, 5067-4626)  
777 for qualitative analysis. Quantification analysis was performed by Illumina Library Quantification  
778 Kit (KAPA Biosystems, KK4824). The library was sequenced on an Illumina HiSeq or NextSeq  
779 2x150 paired-end kits using the following read length: 28 bp Read1 for cell barcode and UMI, 8  
780 bp I7 index for sample index and 91 bp Read2 for transcript.

781

782 **Single cell ATAC sequencing**

783 3-week-old and 8-week-old mice were euthanized and perfused with chilled 1x PBS via left  
784 ventricle. Kidneys (0.25 g) were harvested, minced and lysed in 5 mL lysis buffer for 15 min. 1-  
785 day-old mice were decapitated with surgical scissors, and both kidneys were harvested. Kidneys  
786 were minced and lysed in 2 mL lysis buffer for 15 min. Tissue lysis reaction was then blocked by  
787 adding 10 mL 1x PBS into each tube, and solution was passed through a 40 µm cell strainer. Cell  
788 debris and cytoplasmic contaminants were removed by Nuclei PURE Prep Nuclei Isolation Kit  
789 (Sigma, NUC-201) after centrifugation at 13,000 RPM for 45 min. Nuclei concentration was



790 calculated with Countess AutoCounter (Invitrogen, C10227). Diluted nuclei suspension was  
791 loaded and incubated in transposition mix from Chromium Single Cell ATAC Library & Gel Bead  
792 Kit (10X Genomics, PN-1000110) by targeting 10,000 nuclei recovery. GEMs were then captured  
793 on the Chromium Chip E (10x Genomics, PN-1000082) in the Chromium Controller according to  
794 the manufacturer's protocol (10X Genomics, CG000168). Libraries were generated using the  
795 Chromium Single Cell ATAC Library & Gel Bead Kit and Chromium i7 Multiplex Kit N (10X  
796 Genomics, PN-1000084) according to the manufacturer's manual. Quality control for constructed  
797 library was performed by Agilent Bioanalyzer High Sensitivity DNA kit. The library was sequenced  
798 on an Illumina HiSeq 2x50 paired-end kits using the following read length: 50 bp Read1 for DNA  
799 fragments, 8 bp i7 index for sample index, 16 bp i5 index for cell barcodes and 50 bp Read2 for  
800 DNA fragments.

801

## 802 **Bulk ATAC sequencing**

803 Bulk ATAC-seq was performed as described earlier<sup>63,64</sup>. Briefly, 50,000 nuclei/sample were  
804 tagged with Tn5 transposase (Illumina) in 50 µl reaction volume including Tween-20 (0.1%)  
805 (Sigma) and digitonin (0.01%) (Promega). The reaction was carried out at 37 °C for 30 min in a  
806 thermomixer at 1,000 RPM. After purification of DNA with Qiagen Minelute Reaction Cleanup  
807 kit (Qiagen), samples were subjected to library amplification (8-10 cycles). Libraries were purified  
808 with AmpureXP beads (Beckman Coulter) and their quality was assessed by Agilent High  
809 sensitivity DNA Bioanalysis chip (Agilent). Libraries were submitted to 150 bp PE sequencing.

810

## 811 **snATAC-seq data analysis**

### 812 *Data processing and quality control*

813 Raw fastq files were aligned to the mm10 (GRCm38) reference genome and quantified using Cell  
814 Ranger ATAC (v. 1.1.0). We only kept valid barcodes with number of fragments ranging from  
815 1,000 to 40,000 and mitochondria ratio less than 10%. One of the important indicators for ATAC-  
816 seq data quality is the fraction of peaks in promoter regions, so we did further filtration based on  
817 promoter ratio. We noticed the promoter ratio seemed to follow a binary distribution, with most of  
818 cells either having a promoter ratio around 5% (background) or more than 20% (valid cells)  
819 (**Figure S1d**). We therefore filtered out cells with a promoter ratio <20%. After this stringent  
820 quality control, we obtained 11,429 P0 single cells (5,993 in P0\_batch\_1 and 5,436 in P0\_batch\_2)



821 and 16,887 adult single cells (7,129 in P56\_batch\_3, 6,397 in P56\_batch\_4, and 3,361 in  
822 P21\_batch\_5).

823

### 824 *Preprocessing*

825 Since snATAC-seq data are very sparse, previous methods either conducted peak calling or  
826 binarization before clustering. Here, we chose to do binarization instead of peak calling for two  
827 reasons: 1) Peak calling is time consuming; 2) Many peaks are cell type-specific, open chromatin  
828 regions in rare populations are more likely to be treated as background. After binarizing fragments  
829 into 5 kb bins and removing the fragments not matched to chromosomes or aligned to the  
830 mitochondria, we binarized the cell-bin matrix. In order to only keep bins that were informative  
831 for clustering, we removed the top 5% most accessible bins and bins overlapping with ENCODE  
832 blacklist. The 484,606 remaining bins were used as input for clustering.

833

### 834 *Dimension reduction, batch effect correction and clustering*

835 Clustering was conducted using snapATAC<sup>16</sup>, a single-cell ATAC-seq algorithm scalable to large  
836 dataset. Previous benchmarking evaluation has shown that snapATAC was one of the best-  
837 performing methods for snATAC-seq clustering<sup>65</sup>. Diffusion map was applied as a dimension  
838 reduction method using function *runDiffusionMaps*. To remove batch effect, we used Harmony<sup>17</sup>,  
839 in which the low dimensional embeddings obtained from the diffusion map were used as input.  
840 Harmony iteratively pulled batch-specific centroid to cluster centroid until convergence to remove  
841 the variability across batches. After batch correction, a graph was constructed using k Nearest  
842 Neighbor (kNN) algorithm with k=15, which was then used as input for Louvain clustering. We  
843 used the first 20 dimensions for the Louvain algorithm. The number of dimensions was chosen  
844 using a method recommended by snapATAC, although we noticed that the clustering results were  
845 similar among a series of dimensions from 18 to 30.

846

### 847 *Cell type annotation*

848 We used a published list of marker genes<sup>9,19</sup> to annotate kidney cell types. In order to infer gene  
849 expression of each cell type, we built a cell-gene activity score matrix by integrating all fragments  
850 that overlapped with gene transcript. We used GENCODE Mouse release VM16<sup>22</sup> as reference  
851 annotation.

852

### 853 *Peak calling and visualization*

854 Peak calling was conducted for each cell type separately using MACS2<sup>18</sup>. We aggregated all  
855 fragments obtained from the same cell types to build a pseudo-bulk ATAC data and conducted  
856 peak calling with parameters “--nomodel --keep-dup all --shift 100 --ext 200 --qval 1e-2 -B --  
857 SPMR --call-summits”. By specifying “--SPMR”, MACS2 generated “fragment pileup per million  
858 reads” pileup files, which were converted to bigwig format for visualization using UCSC  
859 bedGraphToBigWig tool.

860

861 We also visualized public chromatin ChIP-seq data and RNA-seq data obtained from ENCODE  
862 Encyclopedia with the following identifiers: ENCFF338WZP, ENCFF872MVE, ENCFF455HPY,  
863 ENCFF049LRQ, ENCFF179NTO, ENCFF071PID, ENCFF746MFH, ENCFF563LOO,  
864 ENCFF184AYF, ENCFF107NQP, ENCFF465THI, ENCFF769XWI, ENCFF591DAX. The Six2  
865 ChIP-seq data were obtained from<sup>66</sup> and the WGBS data were obtained from<sup>67</sup>.

866

### 867 *Genomic elements stratification*

868 Mouse mm10 genome annotation files were download from UCSC Table Browser  
869 (<https://genome.ucsc.edu/cgi-bin/hgTables>) using GENCODE VM23. TSS upstream 5 kb regions  
870 were included as promoter regions, but the results were similar when using 2 kb upstream regions  
871 as promoters. We then studied the number of overlapped regions between open chromatin regions  
872 identified from the snATAC-seq and bulk ATAC-seq dataset and genome annotations. Since one  
873 open chromatin region could overlap with multiple genomic elements, we defined an order of  
874 genomic elements as exon > 5'-UTR > 3'-UTR > intron > promoter > distal elements. To be more  
875 specific, if one peak overlapped with both exon and 5'-UTR, the algorithm would count it as an  
876 exon-region peak.

877

### 878 *Identification of differentially accessible regions*

879 Peaks identified in each cell type were combined to build a union peak set. Overlapping peaks  
880 were then merged to one peak using *reduce* function from the GenomicRanges package. This  
881 resulted in 300,755 peaks, which were used to build binarized cell-by-peak matrix. Differentially  
882 accessible peaks (DAPs) for each cell type were identified by pairwise peak comparison.

883 Specifically, for each peak, we conducted a Fisher's exact test between a cell type and each of the  
884 other cell types. To address multiple testing problem, we used the Benjamini-Hochberg approach  
885 (BH correction) to correct p values. Peaks with corrected p values below significance level (0.05)  
886 in all pairwise tests were defined as DAPs. In total, we obtained 60,683 DAPs, which were used  
887 for motif enrichment analysis.

888

#### 889 *Motif enrichment analysis*

890 Motif enrichment analysis was conducted using DAPs by HOMER v4.10.4<sup>27</sup> with parameters  
891 background="automatic" and scan.size=300. We noticed that *de novo* motif identification only  
892 generated few significant results, so we focused on known motifs for our following study. We used  
893 the significance level of 0.05 for BH corrected p value to determine the enriched results. The motif  
894 enrichment results are provided in **Supplemental Table 3**.

895

#### 896 *Peak-peak correlation analysis*

897 Peak-peak correlation analysis was conducted using Cicero<sup>26</sup>. In order to find developmental  
898 stage-specific peak-peak correlations, the analysis was conducted for P0 and adult separately.  
899 Cicero uses Graphic Lasso with distance penalty to assess the co-accessibility between different  
900 peaks. Cicero analysis was conducted using the *run\_cicero* function with default parameters. A  
901 heuristic cutoff of 0.25 score of co-accessibility was used to determine the connections between  
902 two peaks.

903

#### 904 *snATAC-seq trajectory analysis*

905 snATAC-seq trajectory was conducted using Cicero, which extended Monocle3 to the snATAC-  
906 seq analysis. We obtained the preprocessed P0 snATAC-seq cell-peak matrix from snapATAC as  
907 input for Cicero and conducted dimension reduction using Latent Semantic Indexing (LSI) and  
908 visualized using UMAP. Trajectory graph was built using the function *learn\_graph*. Batch effect  
909 was not observed between the two P0 batches, and the trajectory graph was consistent with cell  
910 type assignment with clustering analysis (**Figures S3 a-b**).

911

912 In order to study how open chromatin changes are associated with the cell fate decision, we first  
913 binned the cells into 15 groups based on their pseudotime and cell type assignment. Next, we

914 studied the DAPs between each group and its ancestral group using the same methods described  
915 above. The number of newly open and closed chromatin regions were reported using pie charts. The exact  
916 peak locations are provided in the **Supplemental Table 7**.

917

#### 918 *Genes and gene ontology terms associated with snATAC-seq trajectory*

919 Based on the binned trajectory graphs and DAPs between each group and its ancestral group, we  
920 next used GREAT tool<sup>68</sup> to study the enrichment of associated genes and gene ontology (GO)  
921 terms along the trajectory. We used the newly open or closed peaks as test regions and all the peaks  
922 from peak-calling output as the background regions for the analysis. The output can be found in  
923 the **Supplemental Table 8 and 9**.

924

#### 925 *Predict cis-regulatory elements*

926 We implemented two methods to study cis-regulatory elements in the snATAC-seq data. The first  
927 method was inspired by Zhu et al.<sup>23</sup>, which was based on the observation that there was co-  
928 enrichment in the genome between the snATAC-seq cell type-specific peaks and scRNA-seq cell  
929 type-specific genes. This method links a gene with a peak if 1) they were both specific in the same  
930 cell type, 2) they were in *cis*, meaning that the peak is in  $\pm 100$  kb region of the TSS of the  
931 corresponding gene, and 3) the peak did not directly overlap with the TSS of the gene. This method  
932 successfully inferred several known distal elements such as for *Six2* and *Slc6a18* (**Figure S2g**).

933

934 Alternatively, we assessed the co-accessibility of two peaks. We implemented Cicero<sup>26</sup>, which  
935 aggregates similar cells to obtain a set of “meta-cells” and address the issue with sparsity in the  
936 snATAC-seq data. We used *run\_cicero* function with default parameters to predict cis-regulatory  
937 elements (CREs). Although it is recommended to use 0.25 as a cutoff for co-accessibility score,  
938 we noticed that this resulted in a great amount of CREs, which could contain many false positives.  
939 Thus, we used a more stringent score of 0.4 for the cutoff and retained 232,380 and 206,701 CRE  
940 links in the P0 and adult data, respectively.

941

#### 942 **Bulk ATAC sequencing analysis**

943 Bulk ATAC-seq raw fastq files were processed using the end-to-end tool ENCODE ATAC-seq  
944 pipeline (**Software and Algorithms**). This tool provided a standard workflow for ATAC-seq data

945 quality control, adaptor removal, alignment, and peak calling. To obtain high quality ATAC-seq  
946 peaks, peak calling results from two biological replicates were compared and only those peaks that  
947 were present in both replicates were kept, which were further used to compare with snATAC-seq  
948 peaks.

949

### 950 **Correlation of bulk and single nuclei ATAC sequencing data**

951 snATAC-seq reads were aggregated to a pseudo-bulk data for the comparison purpose. To prevent  
952 the effect of sex chromosome and mitochondria chromosome, reads from chromosome X, Y and  
953 M were excluded from our analysis. We used multiBigwigSummary tool from deeptools <sup>69</sup> to study  
954 the correlation between different samples. Specifically, the whole genome was binned into equally  
955 sized (10 kb) windows, and the reads in each bin were aggregated, generating a bin-read count  
956 vector for each of the sample. The correlation of these vectors was computed as a measure of  
957 pairwise similarity between samples.

958

959 To compare the number of peaks in these two datasets, we used as input the narrowpeak files from  
960 the snATAC-seq and bulk ATAC-seq analysis. We filtered out bulk ATAC-seq peaks with q value >  
961 0.01 to be consistent with the snATAC-seq setting. Since the snATAC peaks were called after  
962 merging different time points, we also took the union set of bulk ATAC-seq peaks from different  
963 time points. We then used *findoverlap* function in GenomicRanges package <sup>70</sup> to find and report  
964 overlapped peaks.

965

### 966 **Comparison between single nuclei ATAC sequencing data and single cell RNA sequencing** 967 **data**

968 In order to compare the cluster assignment between snATAC-seq data and scRNA-seq data, we  
969 obtained the average gene expression values and peak accessibility in each cluster for P0 and adult  
970 samples separately. We next transformed snATAC-seq data by summing up the reads within gene  
971 body and 2 kb upstream regions to build gene activity score matrix, as suggested in Seurat <sup>20</sup>. Then,  
972 we normalized the data and computed the mean expression and mean gene activity scores in each  
973 cell type, and calculated z scores of each gene. Pearson's correlation coefficient was then  
974 calculated among top 3,000 highly variable genes between snATAC-seq data and scRNA-seq data.

975 We found high concordance between these two datasets in terms of cell type assignment (**Figure**  
976 **S4**).

977

## 978 **Single cell RNA sequencing data analysis**

### 979 *Alignment and quality control*

980 Raw fastq files were aligned to the mm10 (Ensembl GRCm38.93) reference genome and  
981 quantified using CellRanger v3.1.0. Seurat R package v3.0 was used for data quality control,  
982 preprocessing and dimensional reduction analysis. After gene-cell data matrix generation of both  
983 P0 and adult datasets, matrices were merged and poor-quality cells with <200 or >3,000 expressed  
984 genes and mitochondrial gene percentages >50 were excluded, leaving 25,138 P0 and 18,498 adult  
985 cells for further analytical processing, respectively (**Figures S1j-k**).

986

### 987 *Pre-processing, batch effect correction and dimension reduction*

988 Data were normalized by RPM following log transformation and 3,000 highly variable genes were  
989 selected for scaling and principal component analysis (PCA). Harmony R package v1.0<sup>17</sup> was  
990 used to correct batch effects. The top 20 dimensions of Harmony embeddings were used for  
991 downstream uniform manifold approximation and projection (UMAP) visualization and clustering  
992 (**Figures S1l-m**).

993

### 994 *Cell clustering, identification of marker genes and differentially expressed genes*

995 Louvain algorithm with resolution 0.4 was used to cluster cells, which resulted in 18 distinct cell  
996 clusters. A gene was considered to be differentially expressed if it was detected in at least 25% of  
997 one group and with at least 0.25 log fold change between two groups and the significant level of  
998 BH-adjusted p value <0.05 in Wilcoxon rank sum test was used. We used a list of marker genes  
999<sup>9,19</sup> to manually annotate cell types. 2 distal convoluted tubule clusters were merged based on the  
1000 marker gene expression, resulting in a total of 17 clusters (**Figures S1i, n, o**).

1001

### 1002 *scRNA-seq trajectory analysis*

#### 1003 Monocle3

1004 To construct single cell pseudotime trajectory and to identify genes whose expression changed as  
1005 the cells underwent transition, Monocle3 v0.1.3<sup>71</sup> was applied to P0 cells of the following Seurat

1006 cell clusters: nephron progenitors (NP), proliferating cells, stroma-like cells, podocytes, loop of  
1007 Henle (LOH), early proximal tubule (PT), proximal tubule S1, proximal tubule S3 cells.

1008

1009 To show cell trajectories from both small (nephron progenitors) and large cell populations  
1010 (proximal tubule), an equal number of 450 cells per cluster was randomly subsampled. Cells were  
1011 re-clustered by Monocle3 using a resolution of 0.0005 with k-nearest neighbor (kNN) k=29.  
1012 Highly variable genes along pseudotime were identified using differential *GeneTest* function and  
1013 cells were ordered along pseudotime trajectory. NP cluster was defined as earliest principal node.  
1014 In order to find genes differentially expressed along pseudotime, trajectories for podocytes, loop  
1015 of Henle, and proximal tubule clusters were analyzed separately with the *fit\_models* function of  
1016 Monocle3. Genes with a q value <0.05 in the differential *GeneTest* analysis were kept. In an  
1017 alternate approach, *graph\_test* function of Monocle3 was used and trajectory-variable genes were  
1018 collected into modules at a resolution of 0.01.

1019

#### 1020 RNA velocity

1021 To calculate RNA velocity, Python-based Velocyto command-line tool as well as Velocyto.R  
1022 package were used as instructed <sup>30</sup>. We used Velocyto to calculate the single-cell  
1023 trajectory/directionality using spliced and unspliced reads. From loom files produced by the  
1024 command-line tool, we subset the exact same cells that were previously selected randomly for  
1025 Monocle trajectory analysis. This subset was loaded into R using the SeuratWrappers v0.1.0  
1026 package. RNA velocity was estimated using gene-relative model with k-nearest neighbor (kNN)  
1027 cell pooling (k = 25). The parameter n was set at 200, when visualizing RNA velocity on the  
1028 UMAP embedding.

1029

#### 1030 *Gene regulatory network inference*

1031 In order to identify TFs and characterize cell states, we employed *cis*-regulatory analysis using the  
1032 R package SCENIC v1.1.2.2 <sup>28</sup>, which infers the gene regulatory network based on co-expression  
1033 and DNA motif analysis. The network activity is then analyzed in each cell to identify recurrent  
1034 cellular states. In short, TFs were identified using GENIE3 and compiled into modules (regulons),  
1035 which were subsequently subjected to *cis*-regulatory motif analysis using RcisTarget with two  
1036 gene-motif rankings: 10 kb around the TSS and 500 bp upstream. Regulon activity in every cell



1037 was then scored using AUCell. Finally, binarized regulon activity was projected onto Monocle3-  
1038 created UMAP trajectories.

1039

#### 1040 *Ligand-receptor interactions*

1041 To assess cellular crosstalk between different cell types, we used the CellPhoneDB repository to  
1042 infer cell-cell communication networks from single cell transcriptome data <sup>40</sup>. We used the Python  
1043 package CellPhoneDB v2.1.2 together with the database v2.0.0 to predict cell type-specific ligand-  
1044 receptor complexes as per the authors' instructions. Only receptors and ligands expressed in more  
1045 than 5% of the cells in the specific cluster were considered. 1,000 iterations were used for pairwise  
1046 comparison between cell types and considered for further statistical analysis.

1047

#### 1048 **Immunofluorescence staining**

1049 Mouse kidneys were fixed with 4% paraformaldehyde overnight, rinsed in PBS, and dehydrated  
1050 for paraffin embedding. Antigen retrieval was performed using Tris-EDTA buffer pH 9.0 with a  
1051 pressure cooker (PickCell Laboratories, Agoura Hills, CA) and antibody staining performed as  
1052 described <sup>72</sup>. Antibodies used were as follows: guinea pig FOXL1 (1:1,500) <sup>73</sup>, mouse E-cadherin  
1053 (1:250; BD Transducton 610182, Franklin Lakes, NJ). Cy2-, Cy3-, and Cy5-conjugated donkey  
1054 secondary antibodies were purchased from Jackson ImmunoResearch Laboratories, Inc.  
1055 Fluorescence images were collected on a Keyence microscope.

1056

#### 1057 **Material Table**

| REAGENT or RESOURCE                                              | SOURCE                              | IDENTIFIER      |
|------------------------------------------------------------------|-------------------------------------|-----------------|
| <b>Chemicals, Antibodies, Peptides, and Recombinant Proteins</b> |                                     |                 |
| Guinea pig anti-Foxl1                                            | own production                      | (ref. 73)       |
| Mouse anti-E-cadherin                                            | BD Transducton                      | Cat#610182      |
| Cy2-conjugated donkey secondary antibody                         | Jackson ImmunoResearch Laboratories | Cat#715-225-150 |
| Cy3-conjugated donkey secondary antibody                         | Jackson ImmunoResearch Laboratories | Cat#715-165-150 |



|                                                                                  |                                     |                                                                                                                                                                         |
|----------------------------------------------------------------------------------|-------------------------------------|-------------------------------------------------------------------------------------------------------------------------------------------------------------------------|
| Cy5-conjugated donkey secondary antibody                                         | Jackson ImmunoResearch Laboratories | Cat#715-175-150                                                                                                                                                         |
| DPBS                                                                             | Corning                             | Cat# 21-031-CV                                                                                                                                                          |
| Tet System Approved FBS                                                          | Clontech                            | Cat# 631106                                                                                                                                                             |
| Nonidet™ P40 Substitute                                                          | Sigma                               | Cat# 74385                                                                                                                                                              |
| Magnesium Chloride Solution                                                      | Sigma                               | Cat# M1028                                                                                                                                                              |
| Ultrapure BSA (50 mg/ml)                                                         | Thermo Fisher                       | Cat# AM2616                                                                                                                                                             |
| RNAse inhibitor                                                                  | Applied Biosystems                  | Cat# 100021540                                                                                                                                                          |
| <b>Critical Commercial Assays</b>                                                |                                     |                                                                                                                                                                         |
| Bioanalyzer High Sensitivity DNA kit                                             | Agilent Technologies                | 5067-4626                                                                                                                                                               |
| Chromium Cell B Chip                                                             | 10X Genomics                        | PN-120262                                                                                                                                                               |
| Chromium Chip E                                                                  | 10X Genomics                        | PN-1000082                                                                                                                                                              |
| Chromium Controller                                                              | 10X Genomics                        | PN-120223                                                                                                                                                               |
| Chromium i7 Multiplex Kit                                                        | 10X Genomics                        | PN-120262                                                                                                                                                               |
| Chromium Single Cell 3' Reagent Kits v3                                          | 10X Genomics                        | PN-1000092                                                                                                                                                              |
| Chromium Single Cell ATAC Library & Gel Bead Kit                                 | 10X Genomics                        | PN-1000110                                                                                                                                                              |
| Chromium Single Cell ATAC Library & Gel Bead Kit and Chromium i7 Multiplex Kit N | 10X Genomics                        | PN-1000084                                                                                                                                                              |
| Countess AutoCounter                                                             | Invitrogen                          | C10227                                                                                                                                                                  |
| Illumina Library Quantification Kit                                              | KAPA Biosystems                     | KK4824                                                                                                                                                                  |
| Multi Tissue dissociation kit                                                    | Miltenyi                            | 130-110-201                                                                                                                                                             |
| Nuclei PURE Prep Nuclei Isolation Kit                                            | Sigma                               | NUC-201                                                                                                                                                                 |
| <b>Deposited Data</b>                                                            |                                     |                                                                                                                                                                         |
| Mouse adult kidney WGBS data                                                     | (ref. 67)                           | GSM1051156                                                                                                                                                              |
| Mouse kidney H3K27ac and H3K4me1 CHIP-seq, WGBS, and RNA-seq                     | ENCODE project                      | ENCFF338WZP, ENCFF872MVE, ENCFF455HPY, ENCFF049LRQ, ENCFF179NTO, ENCFF071PID, ENCFF746MFH, ENCFF563LOO, ENCFF184AYF, ENCFF107NQP, ENCFF465THI, ENCFF769XWI, ENCFF591DAX |
| Six2 CHIP-seq data in nephron progenitor cells                                   | (ref. 66)                           | GUDMAP database (RID:Q-Y4CY)                                                                                                                                            |
| <b>Software and Algorithms</b>                                                   |                                     |                                                                                                                                                                         |
| bedtools v. 2.29.2                                                               | open source                         | <a href="https://bedtools.readthedocs.io/en/latest/">https://bedtools.readthedocs.io/en/latest/</a>                                                                     |

|                           |              |                                                                                                                                                                                           |
|---------------------------|--------------|-------------------------------------------------------------------------------------------------------------------------------------------------------------------------------------------|
| Cell Ranger ATAC v. 1.1.0 | 10X Genomics | <a href="https://support.10xgenomics.com/single-cell-atac/software/downloads/latest">https://support.10xgenomics.com/single-cell-atac/software/downloads/latest</a>                       |
| Cell Ranger v. 3.1.0      | 10X Genomics | <a href="https://support.10xgenomics.com/single-cell-gene-expression/software/downloads/latest">https://support.10xgenomics.com/single-cell-gene-expression/software/downloads/latest</a> |
| CellPhoneDB v. 2.1.2      | open source  | <a href="https://www.cellphonedb.org">https://www.cellphonedb.org</a>                                                                                                                     |
| ChromVAR v. 3.1.0         | open source  | <a href="http://bioconductor.org/packages/release/bioc/html/chromVAR.html">http://bioconductor.org/packages/release/bioc/html/chromVAR.html</a>                                           |
| Cicero v. 1.5.5           | open source  | <a href="https://github.com/cole-trapnell-lab/cicero-release">https://github.com/cole-trapnell-lab/cicero-release</a>                                                                     |
| deeptools v. 2.0          | open source  | <a href="https://deeptools.readthedocs.io/en/develop/">https://deeptools.readthedocs.io/en/develop/</a>                                                                                   |
| ENCODE ATAC-seq pipeline  | open source  | <a href="https://github.com/kundajelab/atac_dnase_pipelines">https://github.com/kundajelab/atac_dnase_pipelines</a>                                                                       |
| HOMER v. 4.10.4           | open source  | <a href="http://homer.ucsd.edu/homer/motif/">http://homer.ucsd.edu/homer/motif/</a>                                                                                                       |
| IGV                       | open source  | <a href="http://software.broadinstitute.org/software/igv/">http://software.broadinstitute.org/software/igv/</a>                                                                           |
| MACS2 v. 2.2.6            | open source  | <a href="https://github.com/taoliu/MACS">https://github.com/taoliu/MACS</a>                                                                                                               |
| Monocle3 v. 0.1.3         | open source  | <a href="http://cole-trapnell-lab.github.io/monocle-release/">http://cole-trapnell-lab.github.io/monocle-release/</a>                                                                     |
| Harmony                   | open source  | <a href="https://github.com/immunogenomics/harmony">https://github.com/immunogenomics/harmony</a>                                                                                         |
| SCENIC v. 1.1.2.2         | open source  | <a href="https://aertslab.org/#scenic">https://aertslab.org/#scenic</a>                                                                                                                   |
| Seurat R package v. 3.0   | open source  | <a href="https://satijalab.org/seurat/">https://satijalab.org/seurat/</a>                                                                                                                 |
| snapATAC                  | open source  | <a href="https://github.com/r3fang/SnapATAC">https://github.com/r3fang/SnapATAC</a>                                                                                                       |
| UCSC bedgraph to bigwig   | open source  | <a href="http://hgdownload.soe.ucsc.edu/admin/exe/linux.x86_64.v385/">http://hgdownload.soe.ucsc.edu/admin/exe/linux.x86_64.v385/</a>                                                     |
| UCSC liftOver             | open source  | <a href="https://genome.ucsc.edu/cgi-bin/hgLiftOver">https://genome.ucsc.edu/cgi-bin/hgLiftOver</a>                                                                                       |
| VelocityR                 | open source  | <a href="https://github.com/velocyto-team/velocyto.R">https://github.com/velocyto-team/velocyto.R</a>                                                                                     |
| VisCello                  | open source  | <a href="https://github.com/qinzhu/VisCello">https://github.com/qinzhu/VisCello</a>                                                                                                       |

1058

1059

1060 **Lead Contact and Data Availability**

1061 Raw data files and data matrix are being uploaded onto GEO and an accession number will be  
 1062 provided when it becomes available. The annotated and analyzed data can be viewed at  
 1063 [susztaklab.com/developing\\_adult\\_kidney/snATAC/](https://susztaklab.com/developing_adult_kidney/snATAC/),  
 1064 [susztaklab.com/developing\\_adult\\_kidney/scRNA/](https://susztaklab.com/developing_adult_kidney/scRNA/), and  
 1065 [susztaklab.com/developing\\_adult\\_kidney/igv/](https://susztaklab.com/developing_adult_kidney/igv/). Further information and requests for resources and

1066 reagents should be directed to and will be fulfilled by the lead contact: Katalin Susztak. Email:  
1067 [ksusztak@pennterapeutics.com](mailto:ksusztak@pennterapeutics.com).  
1068  
1069

1070 **Supplemental Information**

1071

1072 **Supplemental Tables**

1073 **Supplemental Table 1.** Cell type marker genes derived from scRNA-seq analysis.

1074 **Supplemental Table 2.** Cell type-specific open chromatin derived from snATAC-seq analysis.

1075 **Supplemental Table 3.** Cell type-specific motif enrichment.

1076 **Supplemental Table 4.** Regulons and respective target genes inferred by SCENIC.

1077 **Supplemental Table 5.** Binarized regulon activities in each cell type inferred by SCENIC.

1078 **Supplemental Table 6.** Differentially expressed genes along pseudotime in distinct lineages in  
1079 scRNA-seq data.

1080 **Supplemental Table 7.** Differentially accessible peaks along pseudotime in distinct lineages in  
1081 snATAC-seq data.

1082 **Supplemental Table 8.** Nearest genes of differentially accessible peaks along pseudotime in  
1083 distinct lineages in snATAC-seq data.

1084 **Supplemental Table 9.** GO enrichment of differentially accessible peaks along pseudotime in  
1085 distinct lineages inferred by GREAT analysis.

1086 **Supplemental Table 10.** ChromVAR cell-TF enrichment score matrix.

1087 **Supplemental Table 11.** Nearest genes of differentially accessible peaks at bifurcation events  
1088 along pseudotime in distinct lineages inferred by GREAT analysis.

1089 **Supplemental Table 12.** Proportion of cells in each cell type with accessible chromatin  
1090 overlapped with kidney disease associated SNPs.

1091

1092

1093 **Supplemental Figures**

1094 **Figure S1. Quality control and data processing methods for snATAC-seq and scRNA-seq**  
1095 **data analysis.**

1096 (A) Insert size distribution of the 5 snATAC-seq samples showing periodic patterns.

1097 (B) Transcription start sites (TSS) signal enrichment of the 5 snATAC-seq samples.

1098 (C) Spearman correlation between snATAC-seq datasets and bulk ATAC-seq of binned genomic  
1099 regions.

- 1100 (D) Distribution of number of unique molecular identifiers (UMIs, x axis) and promoter ratio (y  
1101 axis) in 5 samples shown by dot plot.
- 1102 (E) Violin plots representing the number of accessible peaks across different clusters in the  
1103 snATAC-seq dataset indicating similar distributions.
- 1104 (F) UMAP representation of the snATAC-seq dataset colored by batches.
- 1105 (G) Stacked bar graphs representing absolute numbers and percentages of identified cell types  
1106 across snATAC-seq batches.
- 1107 (H) Genome browser view of cell type-specific peaks at the TSS of marker genes for 13 cell types  
1108 in the snATAC-seq dataset.
- 1109 (I) From left to right: Stacked bar graphs showing the percentage of different cell types in the P0  
1110 and adult scRNA-seq datasets, tables showing the number of cells in each cell type (nCells) and  
1111 corresponding percentage. NP, nephron progenitor; Podo, podocyte; PT, proximal tubule; S1,  
1112 segment 1; S3, segment 3; LOH, loop of Henle; DCT, distal convoluted tubule cells; PC, collecting  
1113 duct principal cells; IC, collecting duct intercalated cells; Endo, endothelial cells; Macro,  
1114 macrophages; Neutro, neutrophils.
- 1115 (J) UMAP representation of scRNA-seq data colored by the mitochondrial gene ratio (Mt %).
- 1116 (K) Violin plots showing number of informative genes per single cell and unique molecular  
1117 identifiers (UMIs) per single cell. Blue denotes adult kidney, orange denotes P0 kidney.
- 1118 (L, M) Principal component (PC) representation of combined adult and P0 scRNA-seq dataset (left  
1119 panel) and violin plots of corresponding embeddings values (right panel) before (L) and after (M)  
1120 batch correction using Harmony.
- 1121 (N) Dot plot of cell type-specific marker genes. Dot size denotes percentage of cells expressing  
1122 the marker. Color scale represents average expression, orange denotes P0, blue denotes adult  
1123 kidney.
- 1124 (O) Feature plots of representative marker genes projected on UMAP dimension.
- 1125 (P) Correlation between snATAC-seq gene activity scores and gene expression values in adult data,  
1126 which is complementary to **Figure 1g**.
- 1127 (Q) We provide the processed chromatin accessibility dataset via a searchable, interactive website  
1128 ([susztaklab.com/developing\\_adult\\_kidney/igv/](https://susztaklab.com/developing_adult_kidney/igv/)). *Ace2* was used as an example, and we show  
1129 proximal tubule-specific enrichment of peaks at transcription start sites of the *Ace2* (Angiotensin-  
1130 converting enzyme 2) gene (red boxes).

1131  
1132 **Figure S2. Characterization of the cell type-specific regulatory landscape**  
1133 (A) Bar graph representing the number of accessible peaks in distal elements, promoters, introns,  
1134 5'-UTR, 3'UTR and exons, as distributed across samples of snATAC-seq data and bulk ATAC-  
1135 seq data.  
1136 (B) Overlap of scATAC-seq differentially accessible peaks among cell types with H3K27Ac ChIP-  
1137 seq data.  
1138 (C) Number of shared and unique peaks among snATAC-seq cell types. Cell types include nephron  
1139 progenitors and cells differentiated from nephron progenitors.  
1140 (D) Genome browser view of *Umod* as an example for distal open chromatin region and its target  
1141 promoter region.  
1142 (E) Distribution of different open chromatin elements in snATAC-seq cell types.  
1143 (F) Distribution of different open chromatin elements among differentially accessible peaks (DAPs)  
1144 in snATAC-seq cell types.  
1145 (G) Genome browser representations of single cell open chromatin data for individual cell types  
1146 at chromosomal loci around *Six2* and *Slc6a18*, along with their known distal elements (red boxes).  
1147 Corresponding chromosomal interaction of open chromatin regions, as inferred by Cicero  
1148 (**Methods**), is depicted at the top.  
1149 (H) Genome browser views of representative marker genes demonstrating cell type-specific  
1150 chromatin accessibility for proximal tubule (*Hnf4a* and *Hmgb3*), several tubular segments (*Hnf1b*),  
1151 loop of Henle and distal convoluted tubule (*Esrrb* and *Pparg1a*) as well as nephron progenitors  
1152 and podocytes (Wt1).  
1153 (I) UMAP depiction of regulon activity (“on-blue”, “off-grey”) and RNA expression (red scale) of  
1154 exemplary regulons of proximal tubule (*Hnf1a*), nephron progenitors (*Six2*), loop of Henle  
1155 (*Pparg1a*), proliferating cells (*Hmgb3*) and podocytes (*Mafb*), respectively. Exemplary target  
1156 gene expression for the respective TF is shown in purple scale.  
1157 (J, K) Bar graphs depicting the absolute number of cell type-specific TFs reported by HOMER (J)  
1158 and SCENIC (K) cis-regulatory analyses, respectively, as well as the number of TFs among DEGs  
1159 from RNA expression data alone.

1160

1161 **Figure S3. snATAC-seq and scRNA-seq cell differentiation trajectories.**

1162 (A) UMAP representation of snATAC-seq trajectory lineages of podocytes, proximal tubule and  
1163 loop of Henle cells from nephron progenitors colored by 2 P0 batches.

1164 (B) UMAP representation of snATAC-seq trajectory lineages of podocytes, proximal tubule and  
1165 loop of Henle cells from nephron progenitors colored by original cell type assignment as in **Figure**  
1166 **1b**.

1167 (C) UMAP representation of scRNA-seq trajectory lineages of podocytes, proximal tubule and  
1168 loop of Henle cells from nephron progenitors colored by original cell type assignment as in **Figure**  
1169 **1b**.

1170 (D) UMAP representation of RNA velocity of scRNA-seq trajectory inferred by VelocityR,  
1171 colored by original cell type assignment. Each dot is one cell and each arrow represents the time  
1172 derivative of the gene expression state.

1173 (E) UMAP representation of snATAC-scRNA integration results colored by cell type assignment.

1174 (F) UMAP representation of snATAC-scRNA integration results colored by technologies  
1175 (snATAC=red, scRNA=grey). Podo: podocytes, PT: proximal tubule, LOH: loop of Henle, DCT:  
1176 distal convoluted tubule, NP: nephron progenitors, IM: intermediate stage cells.

1177 (G) Dot plot showing snATAC-scRNA integration cell type assignment confusion matrix. Each  
1178 column represents the original cell type assignment of snATAC-seq data, and each row represents  
1179 the predicted cell type assignment by the integration analysis scRNA-seq data. Each dot represents  
1180 the number of cells that were matched in the integrated data.

1181 (H) Heatmap of chromVAR enrichment results. The original data matrix is given in **Supplemental**  
1182 **Table 10**.

1183 (I) Pseudotime-dependent chromatin accessibility and gene expression changes along the proximal  
1184 tubule (red), podocytes (green) and loop of Henle (blue) cell lineages. The first column represents  
1185 the dynamics of chromVAR TF enrichment score, the second column represents the dynamics of  
1186 TF gene expression values, and the third and fourth column represent the dynamics of SCENIC-  
1187 reported target gene expression values.

1188



1189 **Figure S4. Chromatin dynamics of nephron progenitor differentiation.**

1190 (A) Di-graph representing cell type and lineage divergence, as derived from Cicero trajectory  
1191 inference. Nephron progenitors (NP), podocytes (Podo), intermediate stage (IM), proximal tubule  
1192 (PT), loop of Henle (LOH) and distal convoluted tubule (DCT) are connected with their  
1193 developmental precursor stages and ordered by ascending numbering. Pie charts represent  
1194 differentially assessible peaks (DAPs) between two stages, where the size of pie charts is  
1195 proportional to the number of DAPs, orange color represents the number of open peaks, grey color  
1196 the number of closed peaks. Bar graphs depict gene ontology (GO) term analysis of genes nearby  
1197 DAPs derived from GREAT analysis (full list in **Supplemental Table 9**).

1198 (B) Immunofluorescence staining of fetal mouse kidney. Upper panel and insert denote E13.5 stage,  
1199 lower panel denotes P6 mouse. Blue staining represents nuclei (DAPI), green staining represents  
1200 tubular epithelium (E-Cadherin) and red staining represents progenitor cells (FOXL1) along a  
1201 developmental trajectory from early progenitor stage (asterisk) over comma-shaped (+) and S  
1202 shaped bodies (cross) towards podocytes within primitive glomeruli (#).

1203 (C) Pseudotime-dependent chromatin accessibility and gene expression changes along the  
1204 proximal tubule (red), podocytes (green) and loop of Henle (LOH, blue) cell lineages for important  
1205 bifurcation TFs in the podocyte (*Foxl1*) and distal tubule (*Tfap2b*) lineage.

1206 (D) Bar graphs denote the percentage of cells with accessible chromatin of several *Six2* promoters  
1207 and enhancers (gene loci numbered 1-3) as well as putative *Foxl1* enhancers (gene loci numbered  
1208 4-7) along pseudotime. Exact gene loci of enhancers and promoters are given above each  
1209 respective graph. Changes along pseudotime are depicted for 3 lineages from nephron progenitors  
1210 (NP) to podocytes, proximal tubule (PT) and loop of Henle (LOH) cells, respectively. The right  
1211 upper subpanel depicts the genome browser overview of chromatin accessibility for the NP and  
1212 therefore corresponds to the first bar in graphs on the left. The right lower subpanel depicts zoom-  
1213 in versions of the 7 loci for all 3 lineages.

1214

1215 **Figure S5. Accessibility of peaks overlap with kidney disease SNPs.**

1216 Heatmap showing the proportion of cells in each cell type with accessibility of SNP-overlapped  
1217 peaks. The SNP IDs as well as nearest genes are provided in **Supplemental Table 12**.

1218

1219 **Figure S6. Single cell level chromatin accessibility highlighted human kidney GWAS target**  
1220 **genes and cell types.**

1221 Open chromatin and co-accessibility view at alternative scales to those shown in **Figure 6**.

1222 (A, C, E) From top to bottom: Cicero-inferred co-accessibility of open chromatin regions in mouse  
1223 orthologues of human *Shroom3*, *Dab2* and *Uncx* loci; Gene browser view of the single nucleotide  
1224 polymorphisms within the regions; gene browser view of chromatin accessibility for nephron  
1225 progenitors (NP), collecting duct intercalated cells (IC), collecting duct principal cell types (PC),  
1226 proximal tubules segment 1 and 3 (PT S1 and PT S3), loop of Henle (LOH), distal convoluted  
1227 tubule (DCT), stromal cells (stroma), podocytes (Podo), endothelial cells (Endo) and immune cells  
1228 (Immune). Right subpanel shows violin plots of scRNA-seq gene expression in P0 (orange) and  
1229 adult (blue) kidneys.

1230 (B, D, F) Whole kidney H3K27ac, H3K4me1 and Six2 ChIP-seq, whole genome bisulfate  
1231 sequencing (WGBS) and RNA-seq data in E15.5, P0 and adult kidney samples.

1232

1233

1234 **References**

1235

1236 1 Reidy, K., Kang, H. M., Hostetter, T. & Susztak, K. Molecular mechanisms of diabetic  
1237 kidney disease. *J Clin Invest* **124**, 2333-2340, doi:10.1172/JCI72271 (2014).

1238 2 Costantini, F. & Kopan, R. Patterning a complex organ: branching morphogenesis and  
1239 nephron segmentation in kidney development. *Dev Cell* **18**, 698-712,  
1240 doi:10.1016/j.devcel.2010.04.008 (2010).

1241 3 Park, J. S. *et al.* Six2 and Wnt regulate self-renewal and commitment of nephron  
1242 progenitors through shared gene regulatory networks. *Dev Cell* **23**, 637-651,  
1243 doi:10.1016/j.devcel.2012.07.008 (2012).

1244 4 Harding, S. D. *et al.* The GUDMAP database--an online resource for genitourinary  
1245 research. *Development (Cambridge, England)* **138**, 2845-2853, doi:10.1242/dev.063594  
1246 (2011).

1247 5 Wu, H. *et al.* Comparative Analysis and Refinement of Human PSC-Derived Kidney  
1248 Organoid Differentiation with Single-Cell Transcriptomics. *Cell Stem Cell* **23**, 869-881  
1249 e868, doi:10.1016/j.stem.2018.10.010 (2018).

1250 6 Takasato, M. *et al.* Kidney organoids from human iPS cells contain multiple lineages and  
1251 model human nephrogenesis. *Nature* **526**, 564-568, doi:10.1038/nature15695 (2015).

- 1252 7 Morizane, R. & Bonventre, J. V. Generation of nephron progenitor cells and kidney  
1253 organoids from human pluripotent stem cells. *Nat Protoc* **12**, 195-207,  
1254 doi:10.1038/nprot.2016.170 (2017).
- 1255 8 Nishinakamura, R. Human kidney organoids: progress and remaining challenges. *Nature*  
1256 *Reviews Nephrology* **15**, 613-624, doi:10.1038/s41581-019-0176-x (2019).
- 1257 9 Combes, A. N. *et al.* Correction: Single cell analysis of the developing mouse kidney  
1258 provides deeper insight into marker gene expression and ligand-receptor crosstalk  
1259 (doi:10.1242/dev.178673). *Development* **146**, doi:10.1242/dev.182162 (2019).
- 1260 10 Adam, M., Potter, A. S. & Potter, S. S. Psychrophilic proteases dramatically reduce  
1261 single-cell RNA-seq artifacts: a molecular atlas of kidney development. *Development*  
1262 (*Cambridge, England*) **144**, 3625-3632, doi:10.1242/dev.151142 (2017).
- 1263 11 Schmidt-Ott, K. M. How to grow a kidney: patient-specific kidney organoids come of  
1264 age. *Nephrol Dial Transplant* **32**, 17-23, doi:10.1093/ndt/gfw256 (2017).
- 1265 12 Menon, R. *et al.* Single-cell analysis of progenitor cell dynamics and lineage  
1266 specification in the human fetal kidney. *Development (Cambridge, England)* **145**,  
1267 doi:10.1242/dev.164038 (2018).
- 1268 13 Lindstrom, N. O. *et al.* Progressive Recruitment of Mesenchymal Progenitors Reveals a  
1269 Time-Dependent Process of Cell Fate Acquisition in Mouse and Human Nephrogenesis.  
1270 *Dev Cell* **45**, 651-660 e654, doi:10.1016/j.devcel.2018.05.010 (2018).
- 1271 14 Hochane, M. *et al.* Single-cell transcriptomics reveals gene expression dynamics of  
1272 human fetal kidney development. *PLOS Biology* **17**, e3000152,  
1273 doi:10.1371/journal.pbio.3000152 (2019).
- 1274 15 Park, J., Liu, C. L., Kim, J. & Susztak, K. Understanding the kidney one cell at a time.  
1275 *Kidney Int* **96**, 862-870, doi:10.1016/j.kint.2019.03.035 (2019).
- 1276 16 Fang, R. *et al.* Fast and Accurate Clustering of Single Cell Epigenomes Reveals Cis-  
1277 Regulatory Elements in Rare Cell Types. *bioRxiv*, 615179, doi:10.1101/615179 (2019).
- 1278 17 Korsunsky, I. *et al.* Fast, sensitive and accurate integration of single-cell data with  
1279 Harmony. *Nat Methods* **16**, 1289-1296, doi:10.1038/s41592-019-0619-0 (2019).
- 1280 18 Zhang, Y. *et al.* Model-based analysis of ChIP-Seq (MACS). *Genome Biol* **9**, R137,  
1281 doi:10.1186/gb-2008-9-9-r137 (2008).
- 1282 19 Park, J. *et al.* Single-cell transcriptomics of the mouse kidney reveals potential cellular  
1283 targets of kidney disease. *Science* **360**, 758-763, doi:10.1126/science.aar2131 (2018).
- 1284 20 Stuart, T. *et al.* Comprehensive Integration of Single-Cell Data. *Cell* **177**, 1888-  
1285 1902.e1821, doi:10.1016/j.cell.2019.05.031 (2019).

- 1286 21 Wu, H., Kirita, Y., Donnelly, E. L. & Humphreys, B. D. Advantages of Single-Nucleus  
1287 over Single-Cell RNA Sequencing of Adult Kidney: Rare Cell Types and Novel Cell  
1288 States Revealed in Fibrosis. *J Am Soc Nephrol* **30**, 23-32, doi:10.1681/ASN.2018090912  
1289 (2019).
- 1290 22 Frankish, A. *et al.* GENCODE reference annotation for the human and mouse genomes.  
1291 *Nucleic Acids Res* **47**, D766-D773, doi:10.1093/nar/gky955 (2019).
- 1292 23 Zhu, Q. *et al.* Developmental trajectory of pre-hematopoietic stem cell formation from  
1293 endothelium. *bioRxiv*, 848846, doi:10.1101/848846 (2019).
- 1294 24 Cao, J. *et al.* Joint profiling of chromatin accessibility and gene expression in thousands  
1295 of single cells. *Science* **361**, 1380-1385, doi:10.1126/science.aau0730 (2018).
- 1296 25 O'Brien, L. L. *et al.* Transcriptional regulatory control of mammalian nephron  
1297 progenitors revealed by multi-factor cisomic analysis and genetic studies. *PLoS Genet*  
1298 **14**, e1007181, doi:10.1371/journal.pgen.1007181 (2018).
- 1299 26 Pliner, H. A. *et al.* Cicero Predicts cis-Regulatory DNA Interactions from Single-Cell  
1300 Chromatin Accessibility Data. *Mol Cell* **71**, 858-871 e858,  
1301 doi:10.1016/j.molcel.2018.06.044 (2018).
- 1302 27 Heinz, S. *et al.* Simple combinations of lineage-determining transcription factors prime  
1303 cis-regulatory elements required for macrophage and B cell identities. *Mol Cell* **38**, 576-  
1304 589, doi:10.1016/j.molcel.2010.05.004 (2010).
- 1305 28 Aibar, S. *et al.* SCENIC: single-cell regulatory network inference and clustering. *Nat*  
1306 *Methods* **14**, 1083-1086, doi:10.1038/nmeth.4463 (2017).
- 1307 29 Nittoli, V. *et al.* Characterization of paralogous uncx transcription factor encoding genes  
1308 in zebrafish. *Gene X* **2**, 100011, doi:10.1016/j.gene.2019.100011 (2019).
- 1309 30 La Manno, G. *et al.* RNA velocity of single cells. *Nature* **560**, 494-498,  
1310 doi:10.1038/s41586-018-0414-6 (2018).
- 1311 31 Schep, A. N., Wu, B., Buenrostro, J. D. & Greenleaf, W. J. chromVAR: inferring  
1312 transcription-factor-associated accessibility from single-cell epigenomic data. *Nat*  
1313 *Methods* **14**, 975-978, doi:10.1038/nmeth.4401 (2017).
- 1314 32 Guo, J. K. *et al.* WT1 is a key regulator of podocyte function: reduced expression levels  
1315 cause crescentic glomerulonephritis and mesangial sclerosis. *Hum Mol Genet* **11**, 651-  
1316 659, doi:10.1093/hmg/11.6.651 (2002).
- 1317 33 Kann, M. *et al.* WT1 targets Gas1 to maintain nephron progenitor cells by modulating  
1318 FGF signals. *Development* **142**, 1254-1266, doi:10.1242/dev.119735 (2015).
- 1319 34 Nakai, S. *et al.* Crucial roles of Brn1 in distal tubule formation and function in mouse  
1320 kidney. *Development* **130**, 4751-4759, doi:10.1242/dev.00666 (2003).

- 1321 35 Nilsson, D., Heglind, M., Arani, Z. & Enerbäck, S. Foxc2 is essential for podocyte  
1322 function. *Physiol Rep* **7**, e14083-e14083, doi:10.14814/phy2.14083 (2019).
- 1323 36 Takahashi, T. *et al.* Temporally compartmentalized expression of ephrin-B2 during renal  
1324 glomerular development. *J Am Soc Nephrol* **12**, 2673-2682 (2001).
- 1325 37 Cheng, H. T. & Kopan, R. The role of Notch signaling in specification of podocyte and  
1326 proximal tubules within the developing mouse kidney. *Kidney Int* **68**, 1951-1952,  
1327 doi:10.1111/j.1523-1755.2005.00627.x (2005).
- 1328 38 Kang, H. M. *et al.* Defective fatty acid oxidation in renal tubular epithelial cells has a key  
1329 role in kidney fibrosis development. *Nat Med* **21**, 37-46, doi:10.1038/nm.3762 (2015).
- 1330 39 Das, A. *et al.* Stromal–epithelial crosstalk regulates kidney progenitor cell differentiation.  
1331 *Nature Cell Biology* **15**, 1035-1044, doi:10.1038/ncb2828 (2013).
- 1332 40 Vento-Tormo, R. *et al.* Single-cell reconstruction of the early maternal-fetal interface in  
1333 humans. *Nature* **563**, 347-353, doi:10.1038/s41586-018-0698-6 (2018).
- 1334 41 Trueb, B., Amann, R. & Gerber, S. D. Role of FGFR1 and other FGF signaling proteins  
1335 in early kidney development. *Cell Mol Life Sci* **70**, 2505-2518, doi:10.1007/s00018-012-  
1336 1189-9 (2013).
- 1337 42 Costantini, F. & Shakya, R. GDNF/Ret signaling and the development of the kidney.  
1338 *Bioessays* **28**, 117-127, doi:10.1002/bies.20357 (2006).
- 1339 43 Hwang, D. Y. *et al.* Mutations of the SLIT2-ROBO2 pathway genes SLIT2 and SRGAP1  
1340 confer risk for congenital anomalies of the kidney and urinary tract. *Hum Genet* **134**, 905-  
1341 916, doi:10.1007/s00439-015-1570-5 (2015).
- 1342 44 Fan, X. *et al.* SLIT2/ROBO2 signaling pathway inhibits nonmuscle myosin IIA activity  
1343 and destabilizes kidney podocyte adhesion. *JCI Insight* **1**, e86934,  
1344 doi:10.1172/jci.insight.86934 (2016).
- 1345 45 Sajithlal, G., Zou, D., Silviu, D. & Xu, P. X. Eya 1 acts as a critical regulator for  
1346 specifying the metanephric mesenchyme. *Dev Biol* **284**, 323-336,  
1347 doi:10.1016/j.ydbio.2005.05.029 (2005).
- 1348 46 Wuttke, M. *et al.* A catalog of genetic loci associated with kidney function from analyses  
1349 of a million individuals. *Nat Genet* **51**, 957-972, doi:10.1038/s41588-019-0407-x (2019).
- 1350 47 Hellwege, J. N. *et al.* Mapping eGFR loci to the renal transcriptome and phenome in the  
1351 VA Million Veteran Program. *Nat Commun* **10**, 3842, doi:10.1038/s41467-019-11704-w  
1352 (2019).
- 1353 48 Pattaro, C. *et al.* Genetic associations at 53 loci highlight cell types and biological  
1354 pathways relevant for kidney function. *Nat Commun* **7**, 10023,  
1355 doi:10.1038/ncomms10023 (2016).

- 1356 49 Menon, M. C. *et al.* Intronic locus determines SHROOM3 expression and potentiates  
1357 renal allograft fibrosis. *J Clin Invest* **125**, 208-221, doi:10.1172/JCI76902 (2015).
- 1358 50 Khalili, H. *et al.* Developmental Origins for Kidney Disease Due to Shroom3 Deficiency.  
1359 *J Am Soc Nephrol* **27**, 2965-2973, doi:10.1681/ASN.2015060621 (2016).
- 1360 51 Qiu, C. *et al.* Renal compartment-specific genetic variation analyses identify new  
1361 pathways in chronic kidney disease. *Nat Med* **24**, 1721-1731, doi:10.1038/s41591-018-  
1362 0194-4 (2018).
- 1363 52 Ransick, A. *et al.* Single-Cell Profiling Reveals Sex, Lineage, and Regional Diversity in  
1364 the Mouse Kidney. *Developmental Cell* **51**, 399-413.e397,  
1365 doi:10.1016/j.devcel.2019.10.005 (2019).
- 1366 53 Kobayashi, A. *et al.* Six2 defines and regulates a multipotent self-renewing nephron  
1367 progenitor population throughout mammalian kidney development. *Cell Stem Cell* **3**,  
1368 169-181, doi:10.1016/j.stem.2008.05.020 (2008).
- 1369 54 Subramanian, A. *et al.* Single cell census of human kidney organoids shows  
1370 reproducibility and diminished off-target cells after transplantation. *Nat Commun* **10**,  
1371 5462, doi:10.1038/s41467-019-13382-0 (2019).
- 1372 55 Han, S. H. *et al.* PGC-1alpha Protects from Notch-Induced Kidney Fibrosis  
1373 Development. *J Am Soc Nephrol* **28**, 3312-3322, doi:10.1681/ASN.2017020130 (2017).
- 1374 56 Schaid, D. J., Chen, W. & Larson, N. B. From genome-wide associations to candidate  
1375 causal variants by statistical fine-mapping. *Nat Rev Genet* **19**, 491-504,  
1376 doi:10.1038/s41576-018-0016-z (2018).
- 1377 57 Cusanovich, D. A. *et al.* The cis-regulatory dynamics of embryonic development at  
1378 single-cell resolution. *Nature* **555**, 538-542, doi:10.1038/nature25981 (2018).
- 1379 58 Calderon, D. *et al.* Inferring Relevant Cell Types for Complex Traits by Using Single-  
1380 Cell Gene Expression. *Am J Hum Genet* **101**, 686-699, doi:10.1016/j.ajhg.2017.09.009  
1381 (2017).
- 1382 59 Parikshak, N. N. *et al.* Integrative functional genomic analyses implicate specific  
1383 molecular pathways and circuits in autism. *Cell* **155**, 1008-1021,  
1384 doi:10.1016/j.cell.2013.10.031 (2013).
- 1385 60 Zhu, C. *et al.* An ultra high-throughput method for single-cell joint analysis of open  
1386 chromatin and transcriptome. *Nature Structural & Molecular Biology* **26**, 1063-1070,  
1387 doi:10.1038/s41594-019-0323-x (2019).
- 1388 61 Chen, S., Lake, B. B. & Zhang, K. High-throughput sequencing of the transcriptome and  
1389 chromatin accessibility in the same cell. *Nature Biotechnology* **37**, 1452-1457,  
1390 doi:10.1038/s41587-019-0290-0 (2019).



- 1391 62 Uhlen, M. *et al.* Proteomics. Tissue-based map of the human proteome. *Science* **347**,  
1392 1260419, doi:10.1126/science.1260419 (2015).
- 1393 63 Buenrostro, J. D., Wu, B., Chang, H. Y. & Greenleaf, W. J. ATAC-seq: A Method for  
1394 Assaying Chromatin Accessibility Genome-Wide. *Curr Protoc Mol Biol* **109**, 21 29 21-  
1395 21 29 29, doi:10.1002/0471142727.mb2129s109 (2015).
- 1396 64 Corces, M. R. *et al.* An improved ATAC-seq protocol reduces background and enables  
1397 interrogation of frozen tissues. *Nat Methods* **14**, 959-962, doi:10.1038/nmeth.4396  
1398 (2017).
- 1399 65 Chen, H. *et al.* Assessment of computational methods for the analysis of single-cell  
1400 ATAC-seq data. *Genome Biol* **20**, 241, doi:10.1186/s13059-019-1854-5 (2019).
- 1401 66 O'Brien, L. L. *et al.* Differential regulation of mouse and human nephron progenitors by  
1402 the Six family of transcriptional regulators. *Development* **143**, 595-608,  
1403 doi:10.1242/dev.127175 (2016).
- 1404 67 Hon, G. C. *et al.* Epigenetic memory at embryonic enhancers identified in DNA  
1405 methylation maps from adult mouse tissues. *Nature Genetics* **45**, 1198-1206,  
1406 doi:10.1038/ng.2746 (2013).
- 1407 68 McLean, C. Y. *et al.* GREAT improves functional interpretation of cis-regulatory  
1408 regions. *Nat Biotechnol* **28**, 495-501, doi:10.1038/nbt.1630 (2010).
- 1409 69 Ramirez, F. *et al.* deepTools2: a next generation web server for deep-sequencing data  
1410 analysis. *Nucleic Acids Res* **44**, W160-165, doi:10.1093/nar/gkw257 (2016).
- 1411 70 Lawrence, M. *et al.* Software for Computing and Annotating Genomic Ranges. *PLOS*  
1412 *Computational Biology* **9**, e1003118, doi:10.1371/journal.pcbi.1003118 (2013).
- 1413 71 Cao, J. *et al.* The single-cell transcriptional landscape of mammalian organogenesis.  
1414 *Nature* **566**, 496-502, doi:10.1038/s41586-019-0969-x (2019).
- 1415 72 Zhao, J., Hu, Z. Z., Zheng, X. G. & Ng, S. W. [2-(Tetra-zol-1-yl)acetato-kappaO]tris-(tri-  
1416 phenyl-phosphine-kappaP)silver(I) mono-hydrate. *Acta Crystallogr Sect E Struct Rep*  
1417 *Online* **65**, m1601, doi:10.1107/S1600536809048144 (2009).
- 1418 73 Aoki, R. *et al.* Foxl1-expressing mesenchymal cells constitute the intestinal stem cell  
1419 niche. *Cell Mol Gastroenterol Hepatol* **2**, 175-188, doi:10.1016/j.jcmgh.2015.12.004  
1420 (2016).  
1421



# Figure 1

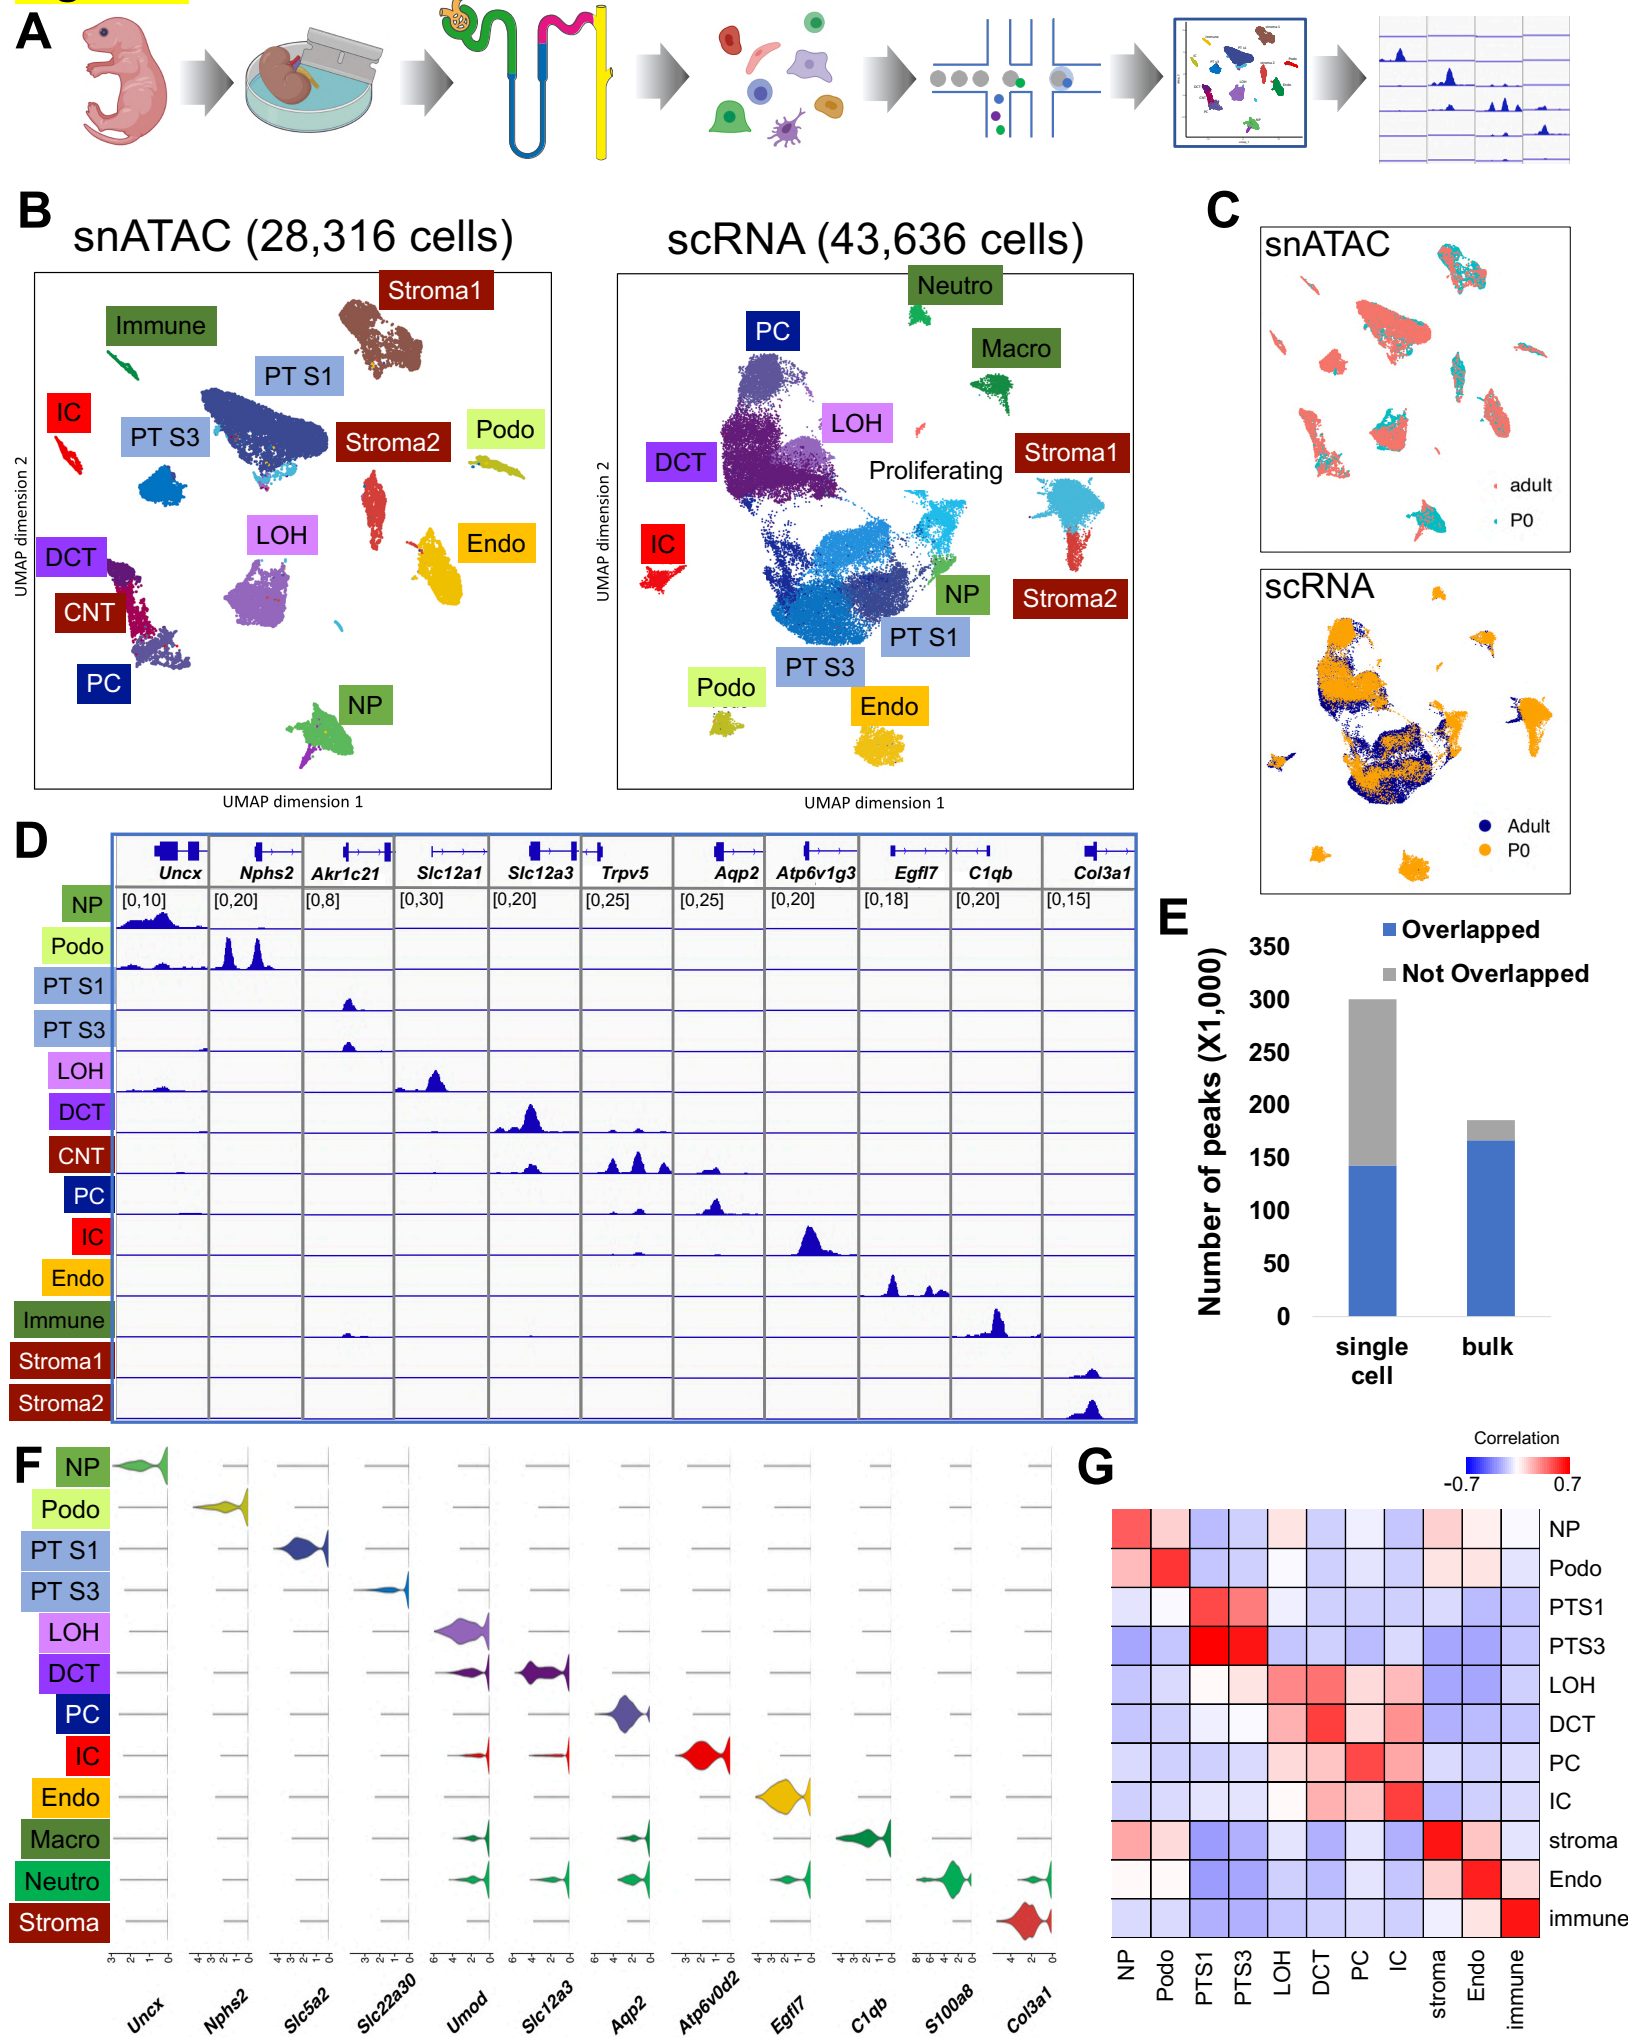

# Figure 2

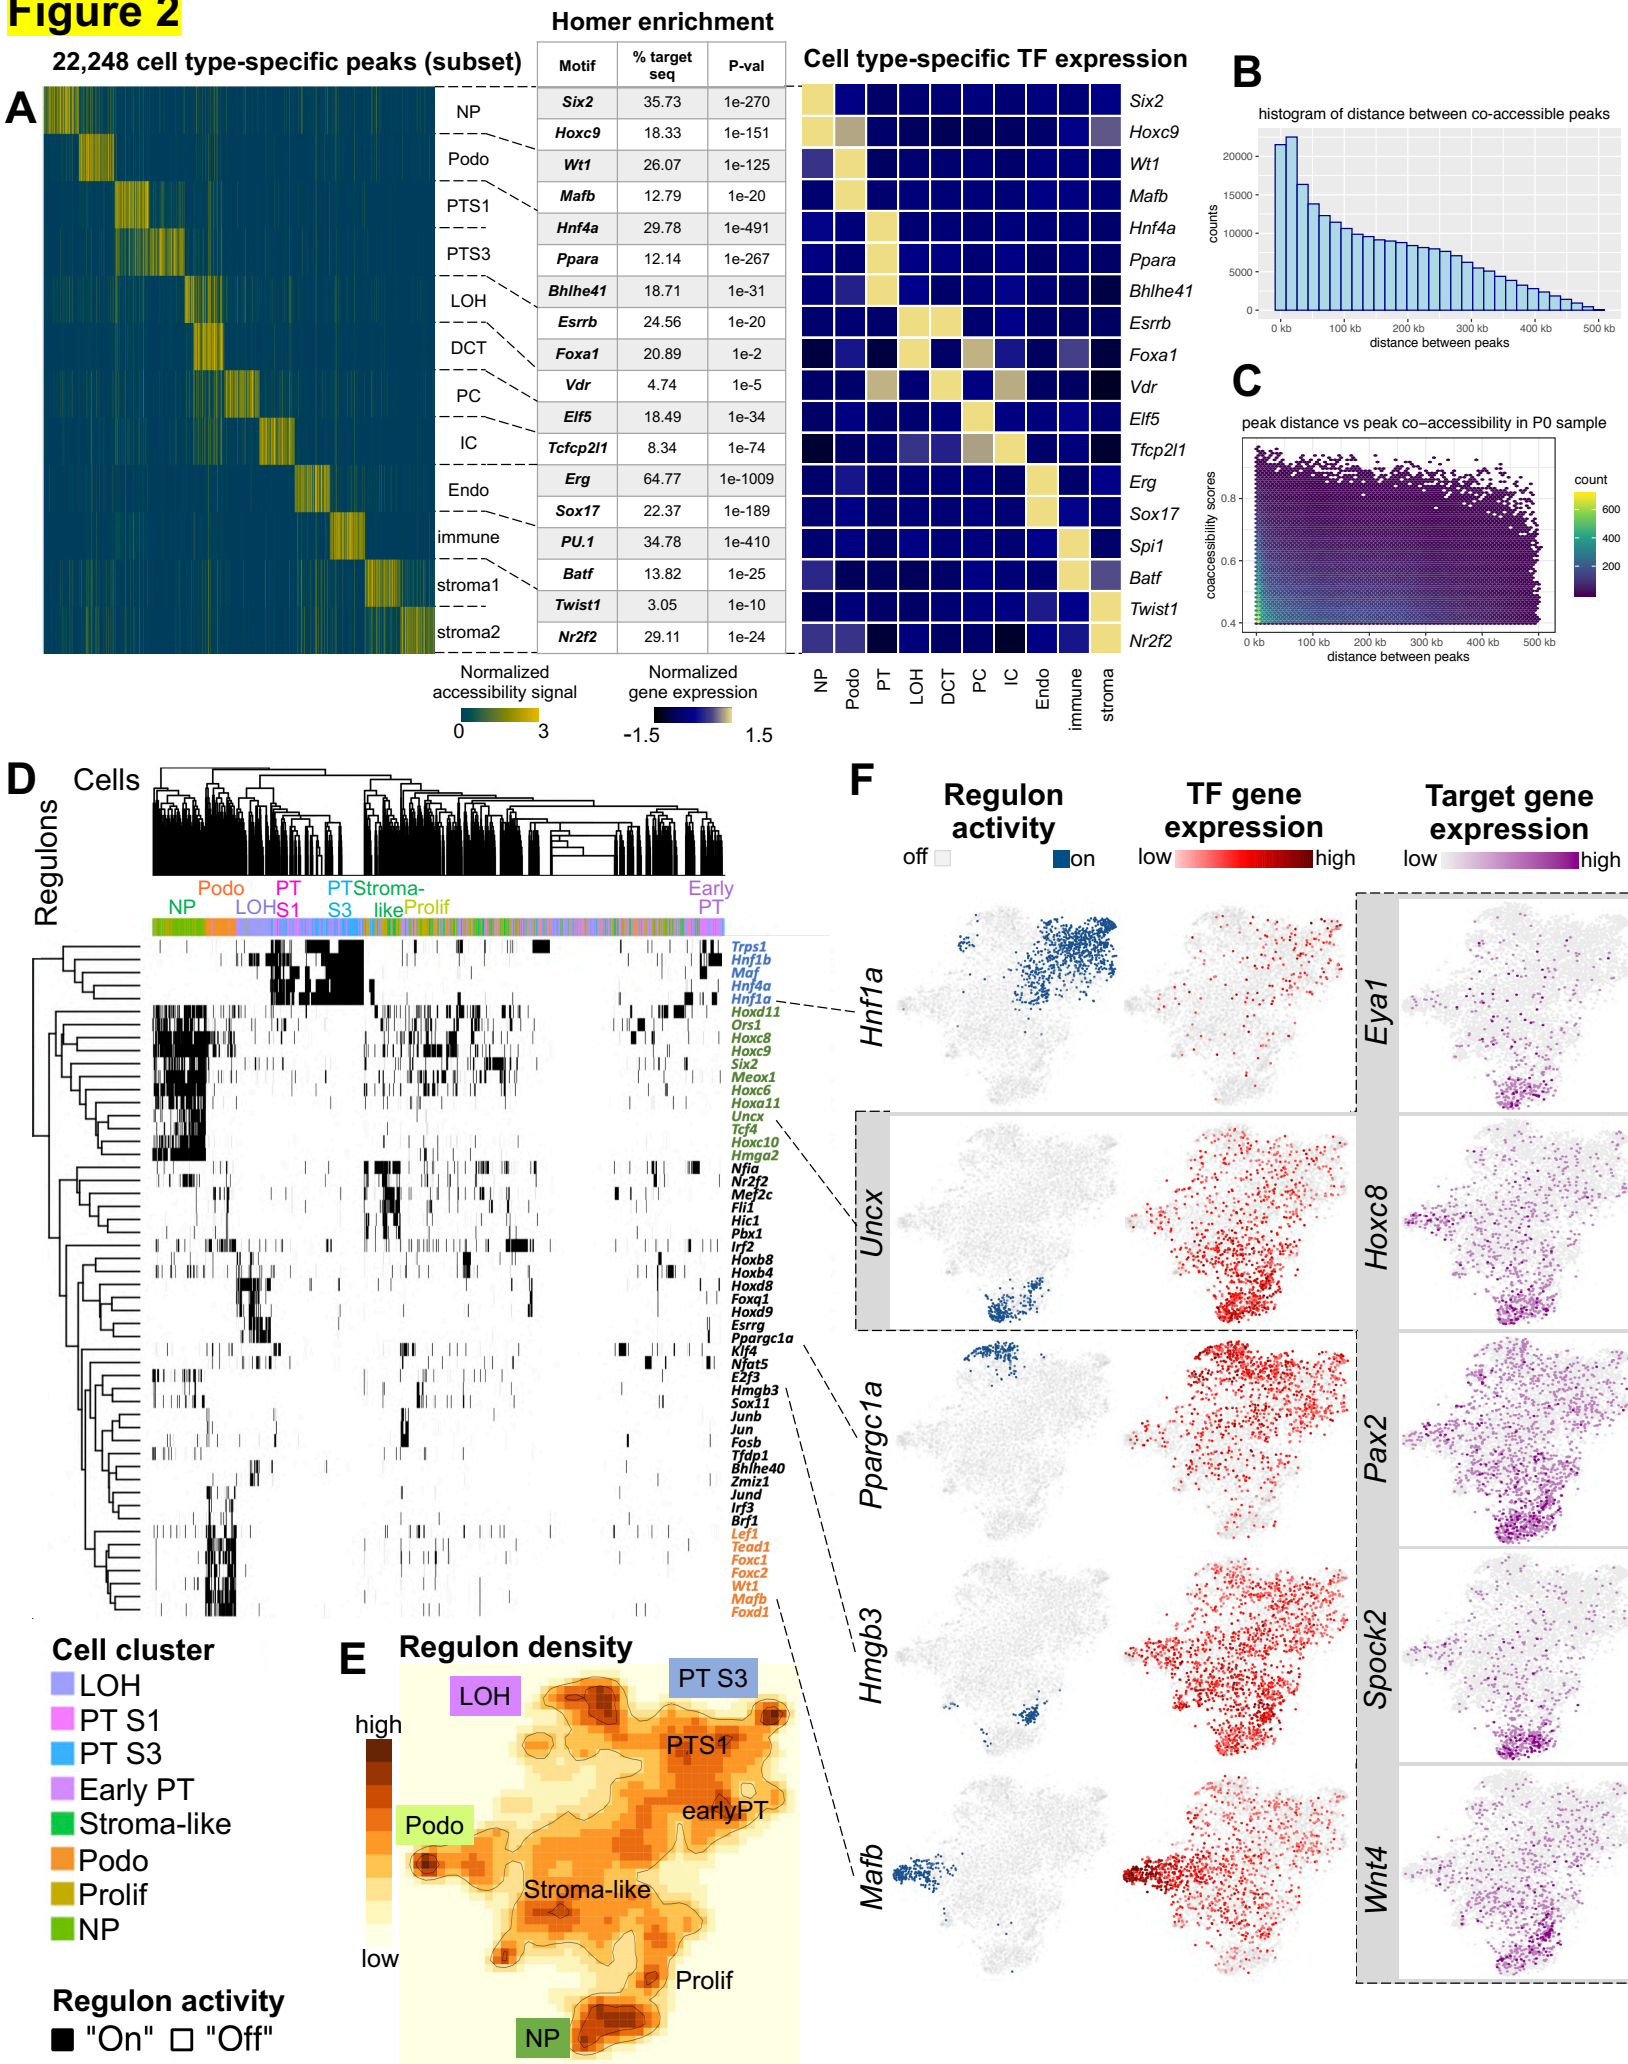



**Figure 3****A** snATAC-seq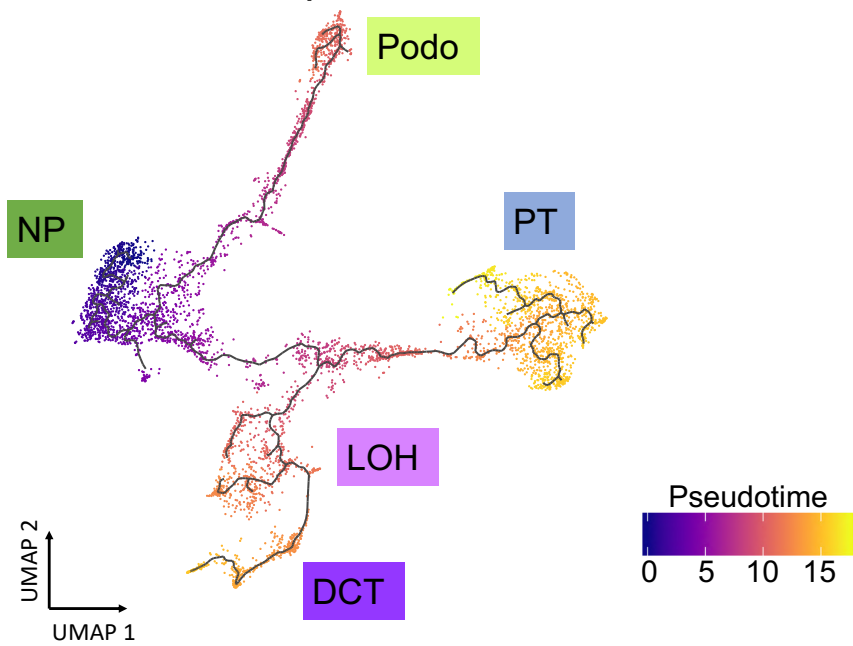**B** scRNA-seq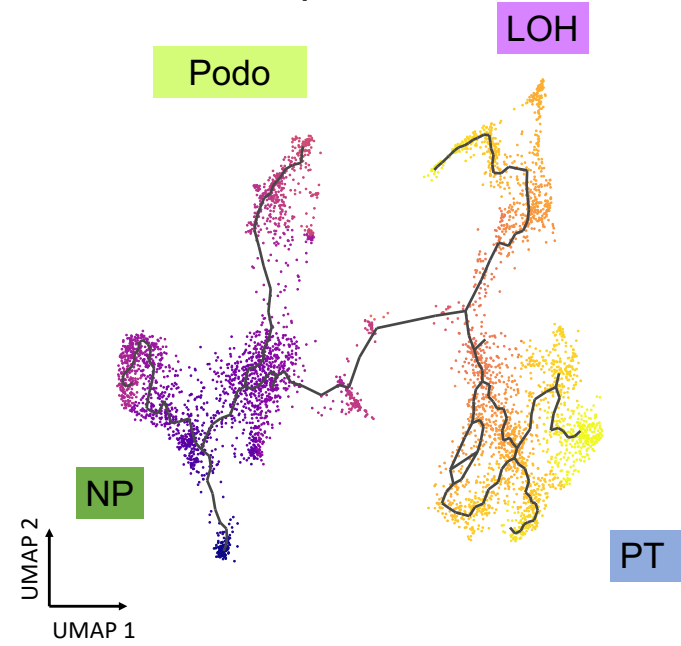**C** chromVAR TF enrichment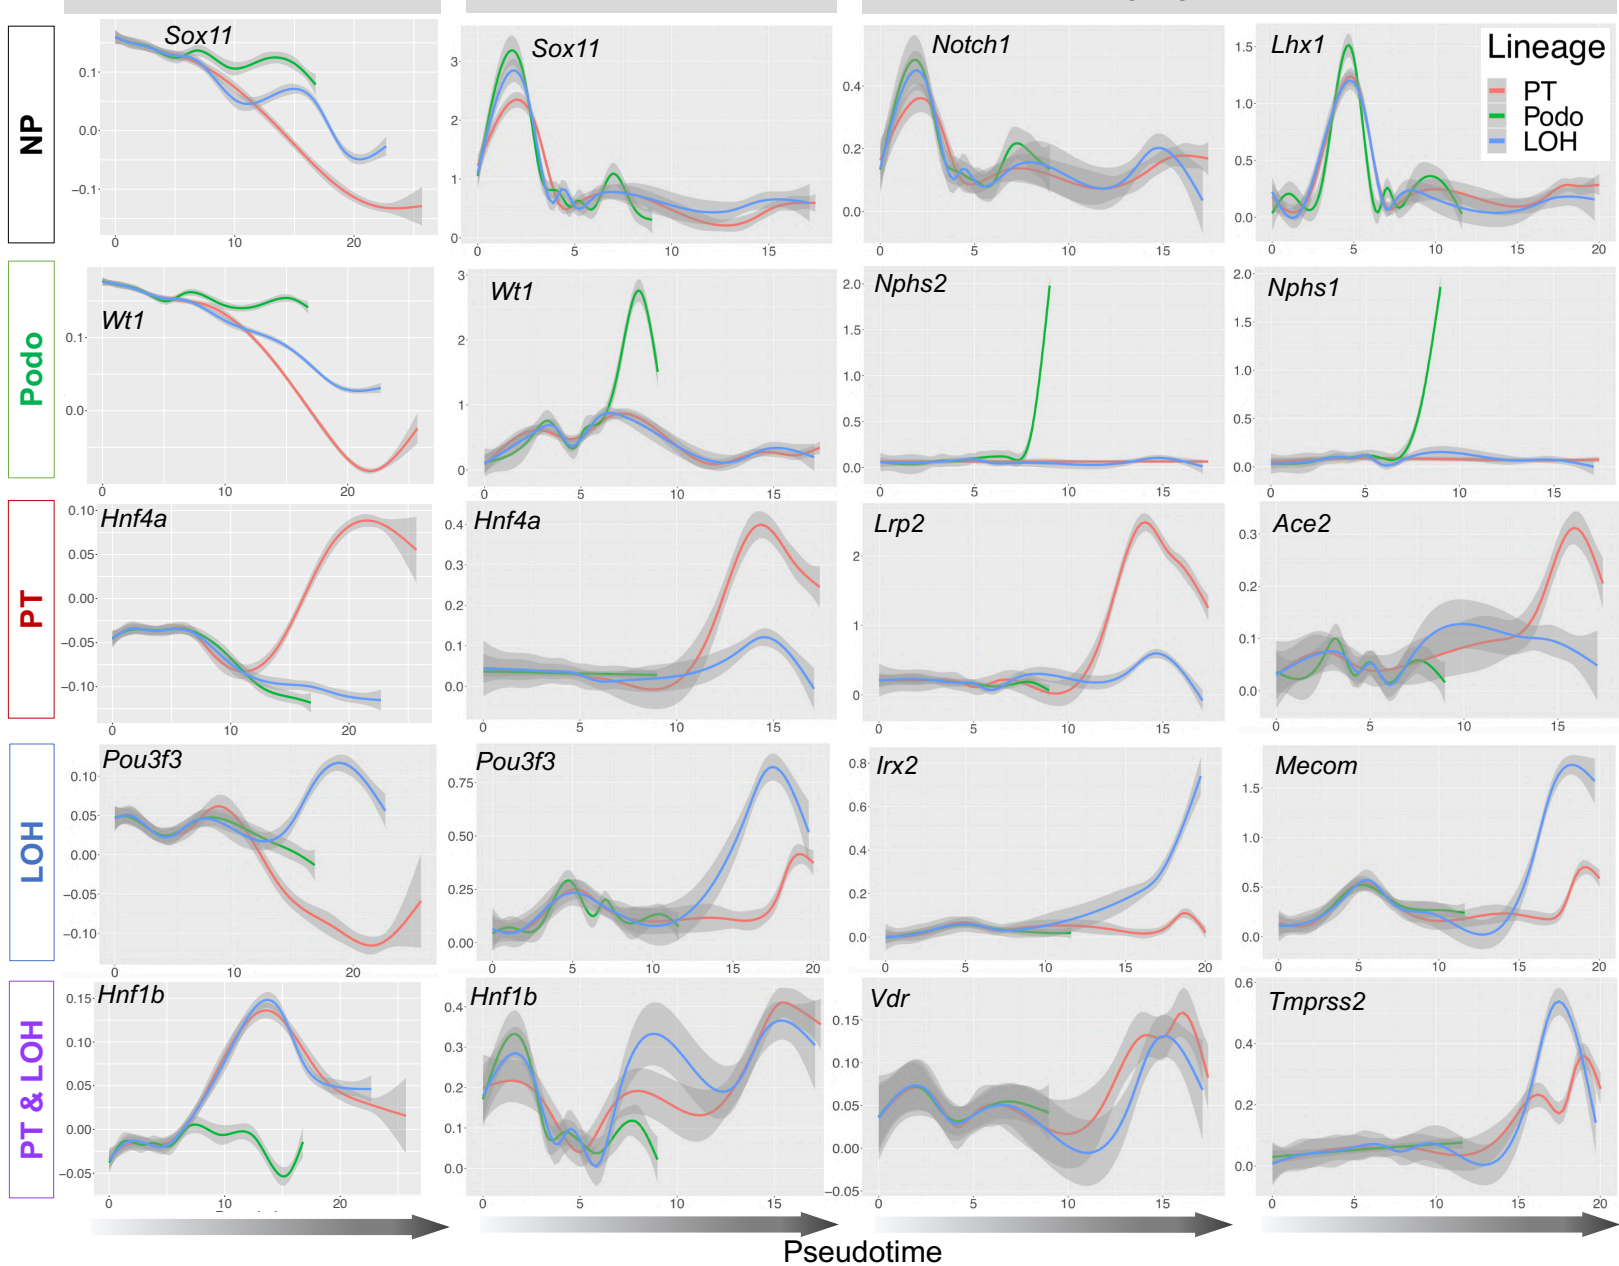

**Figure 4**

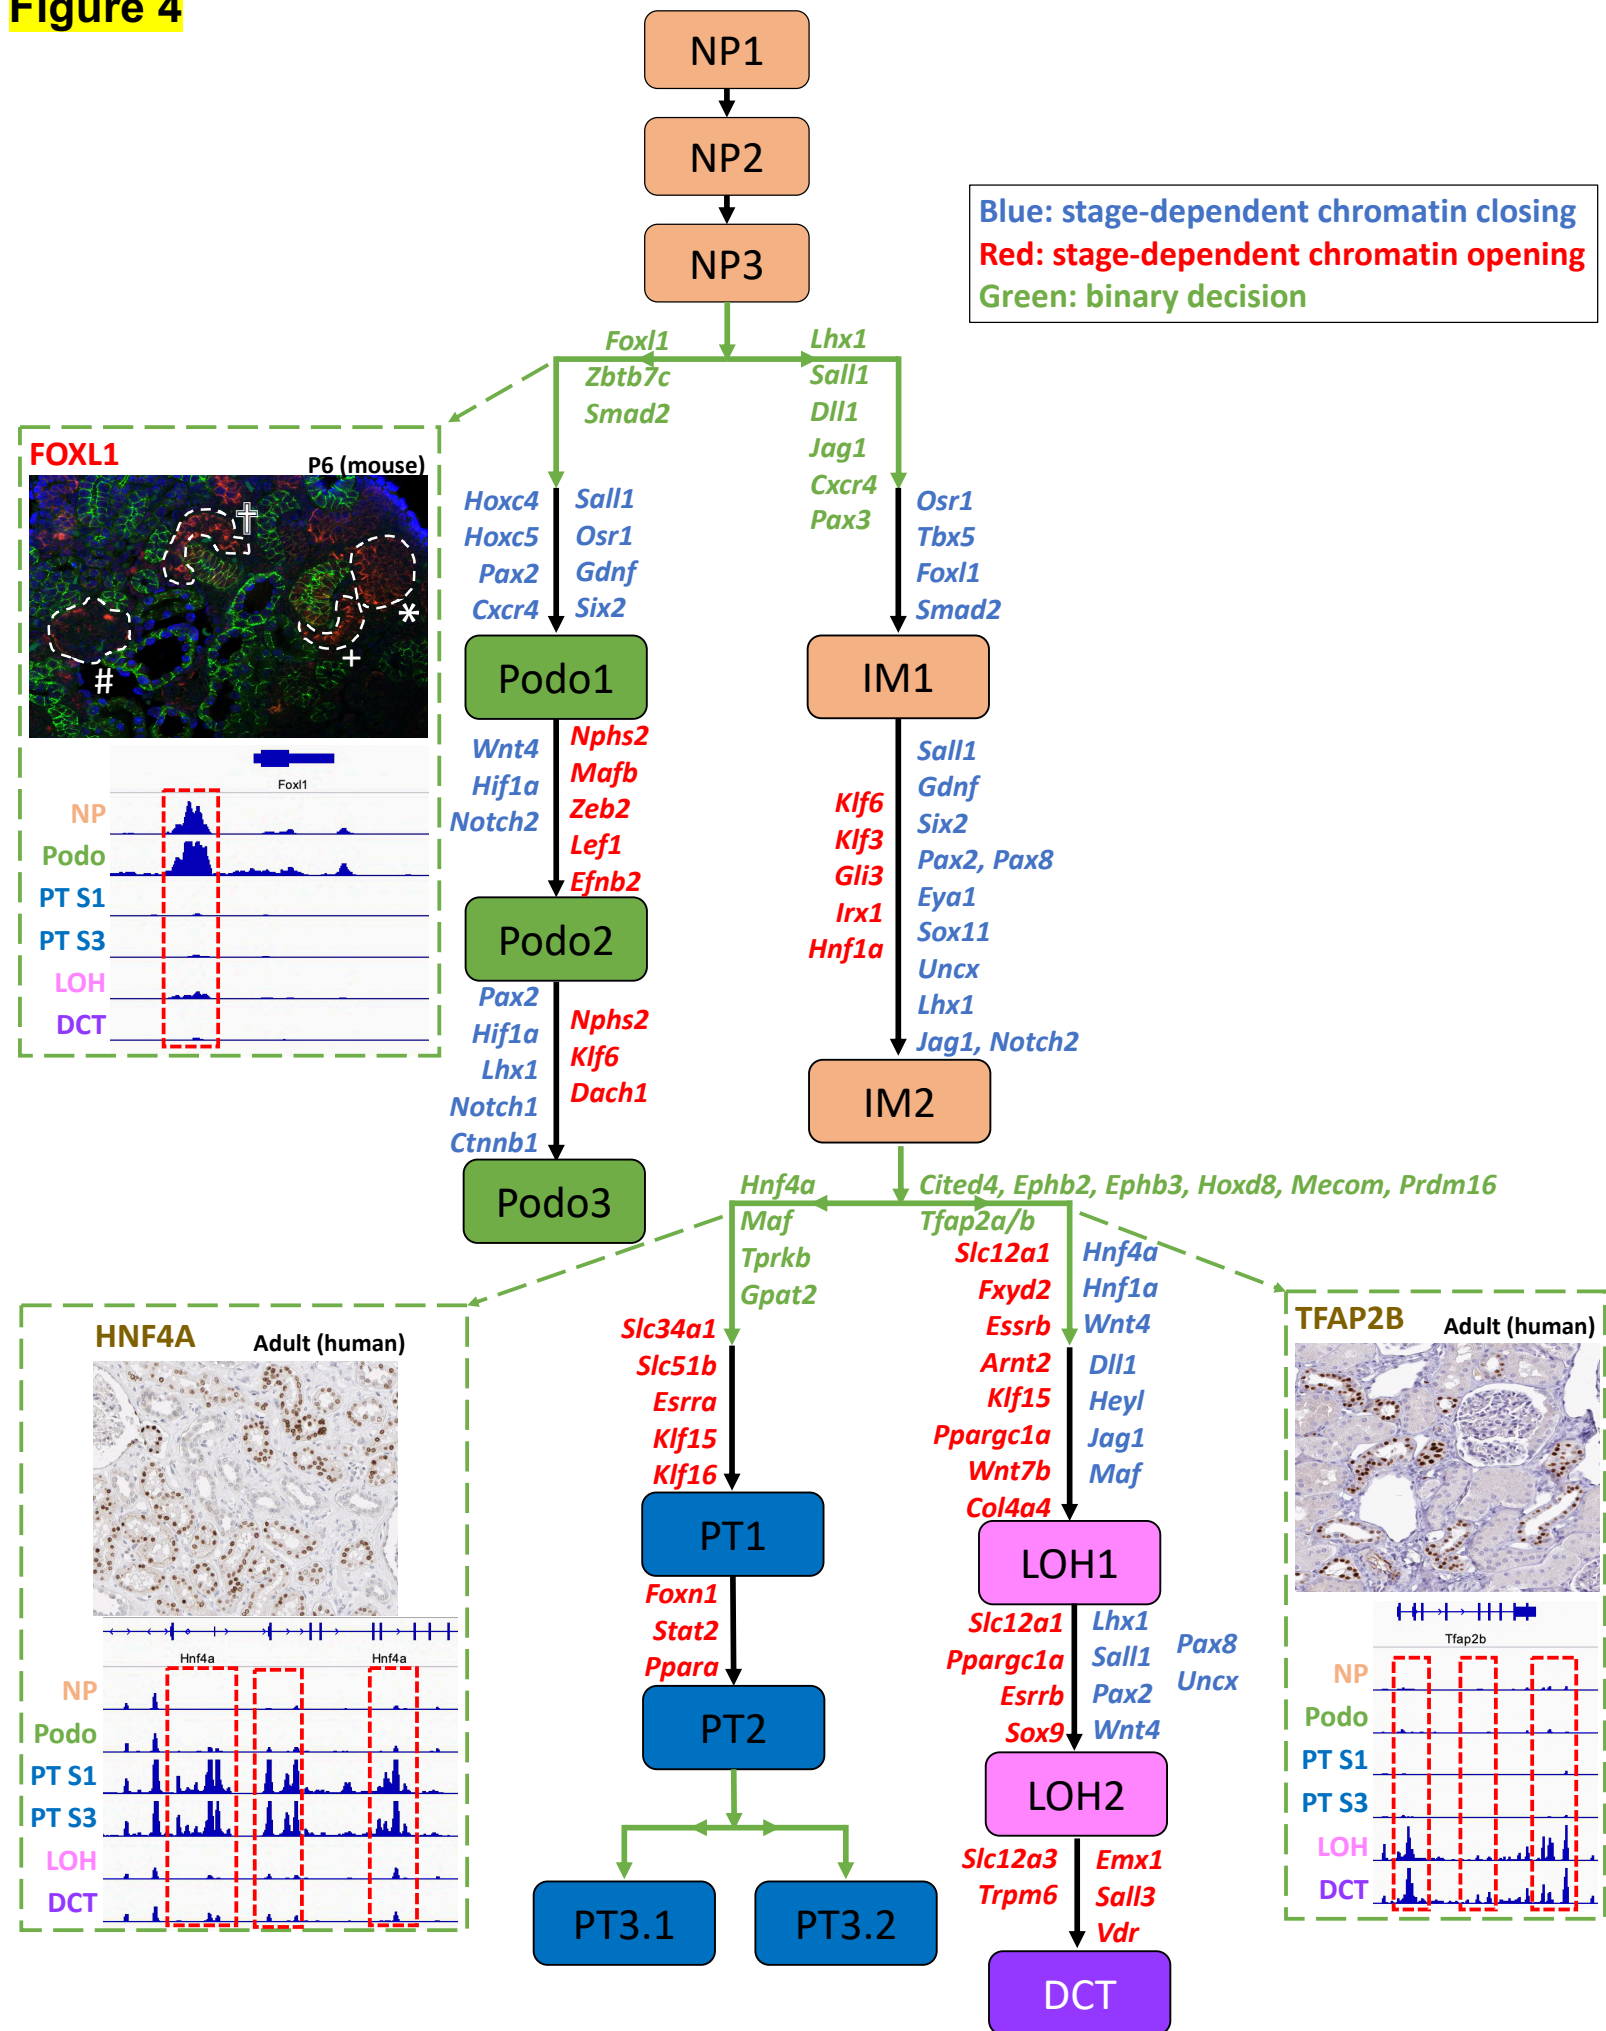



**Figure 5**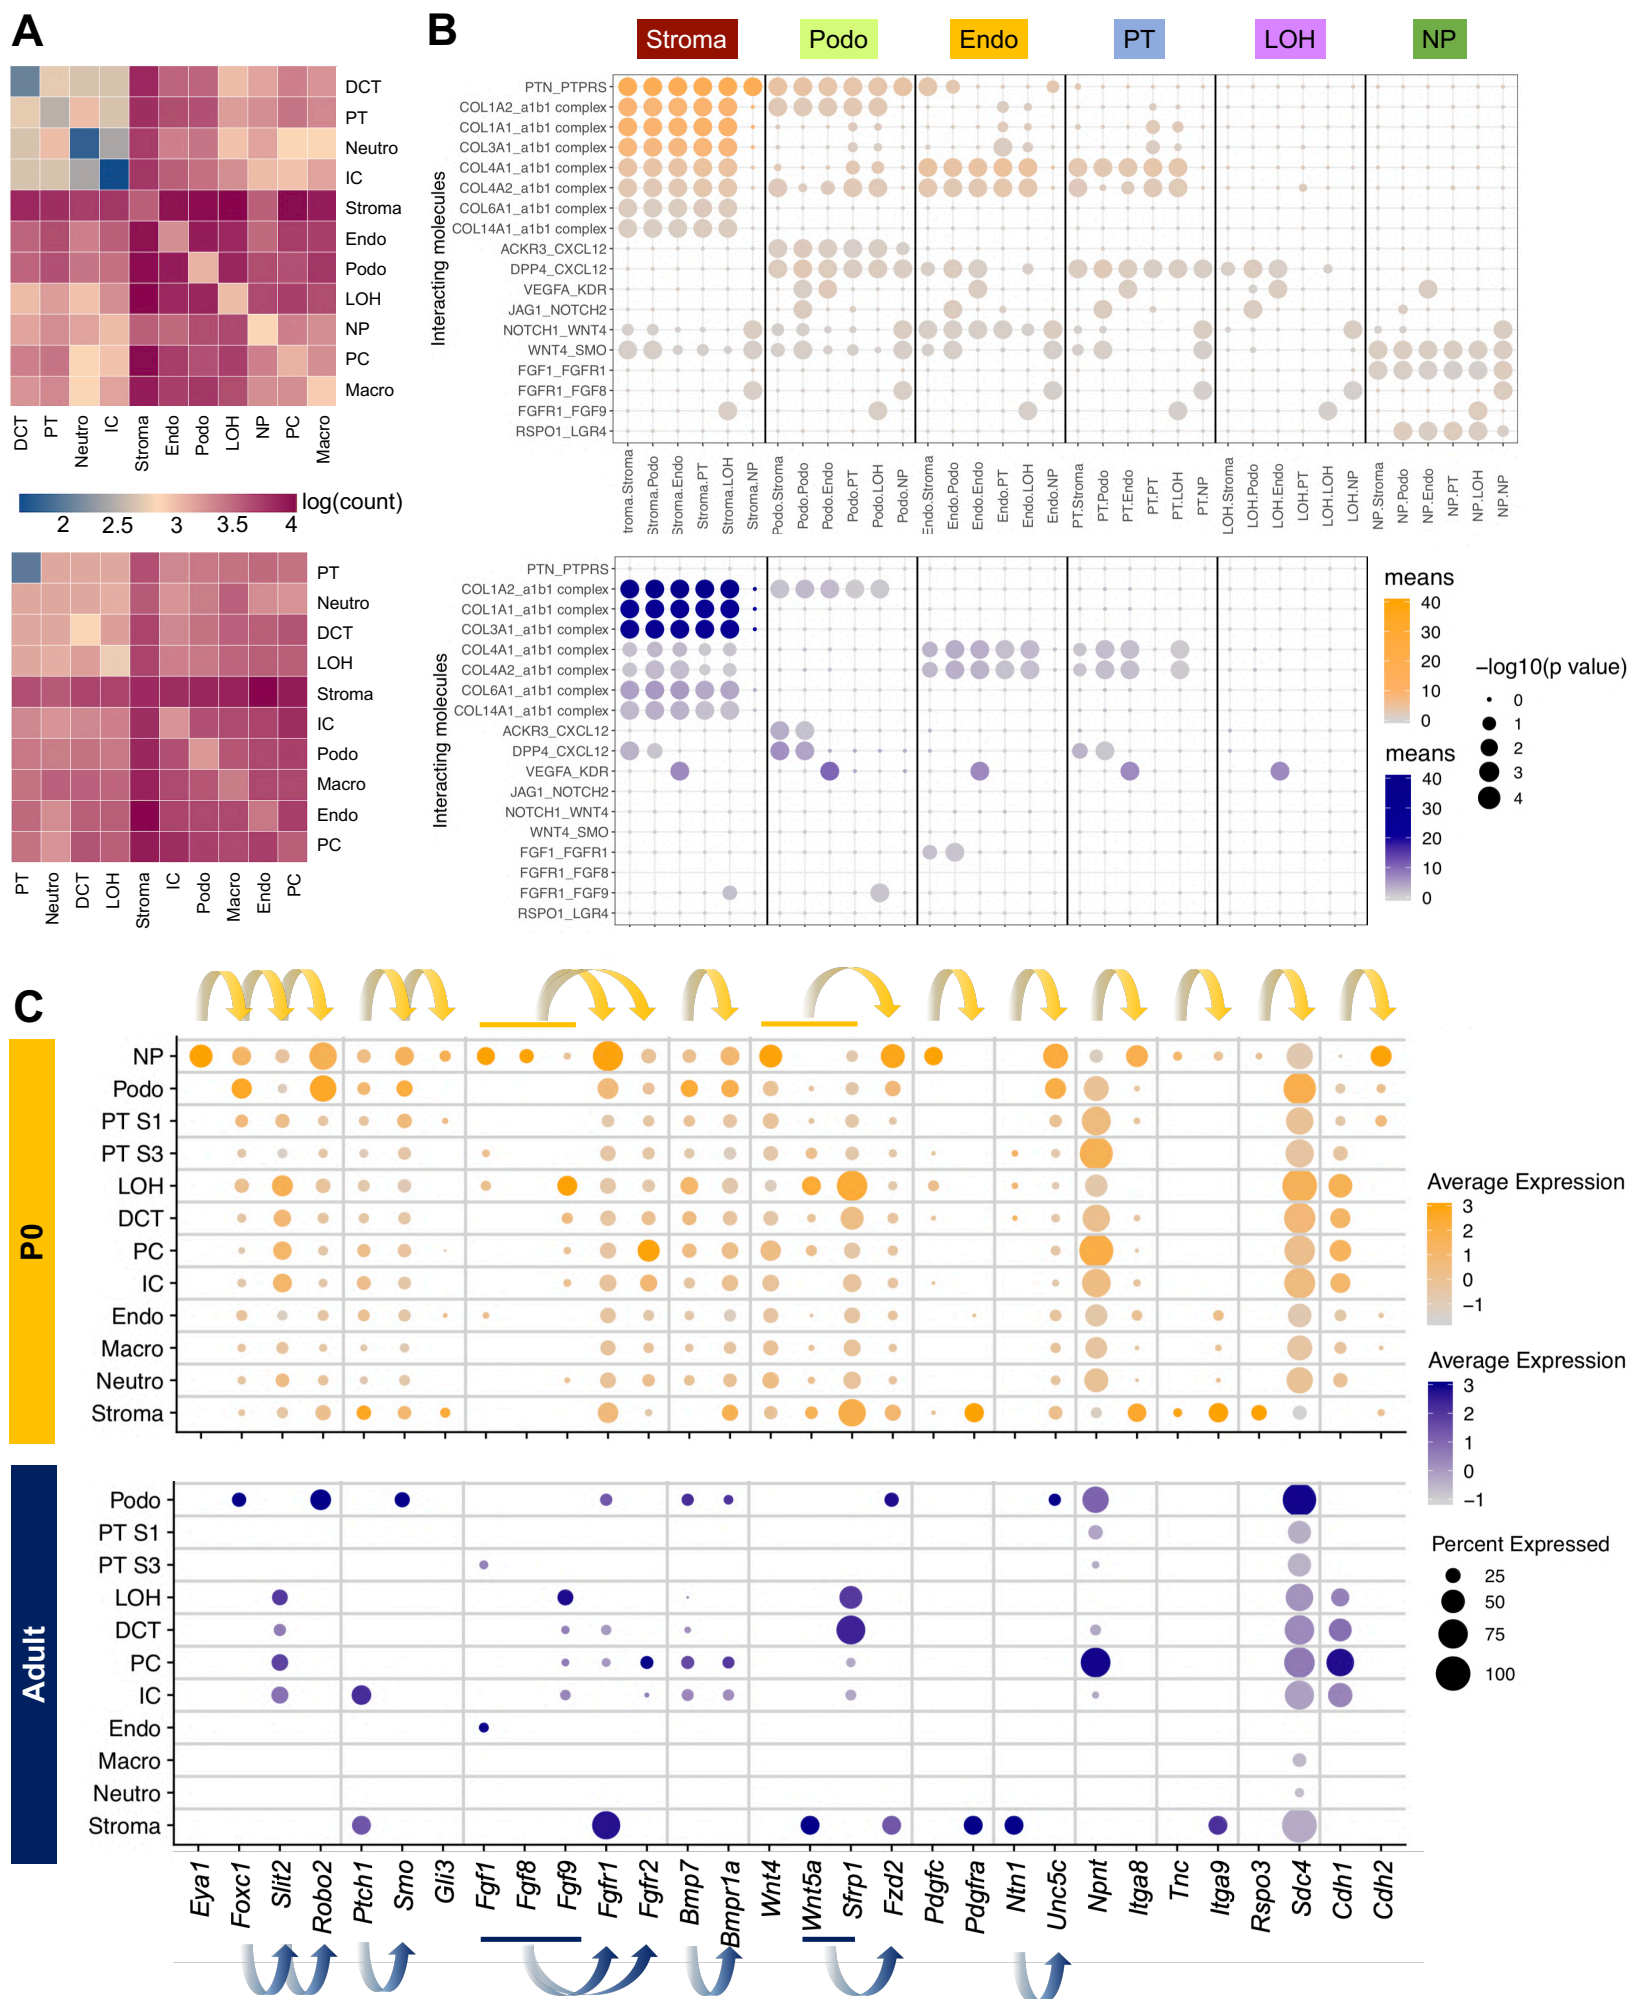

**Figure 6**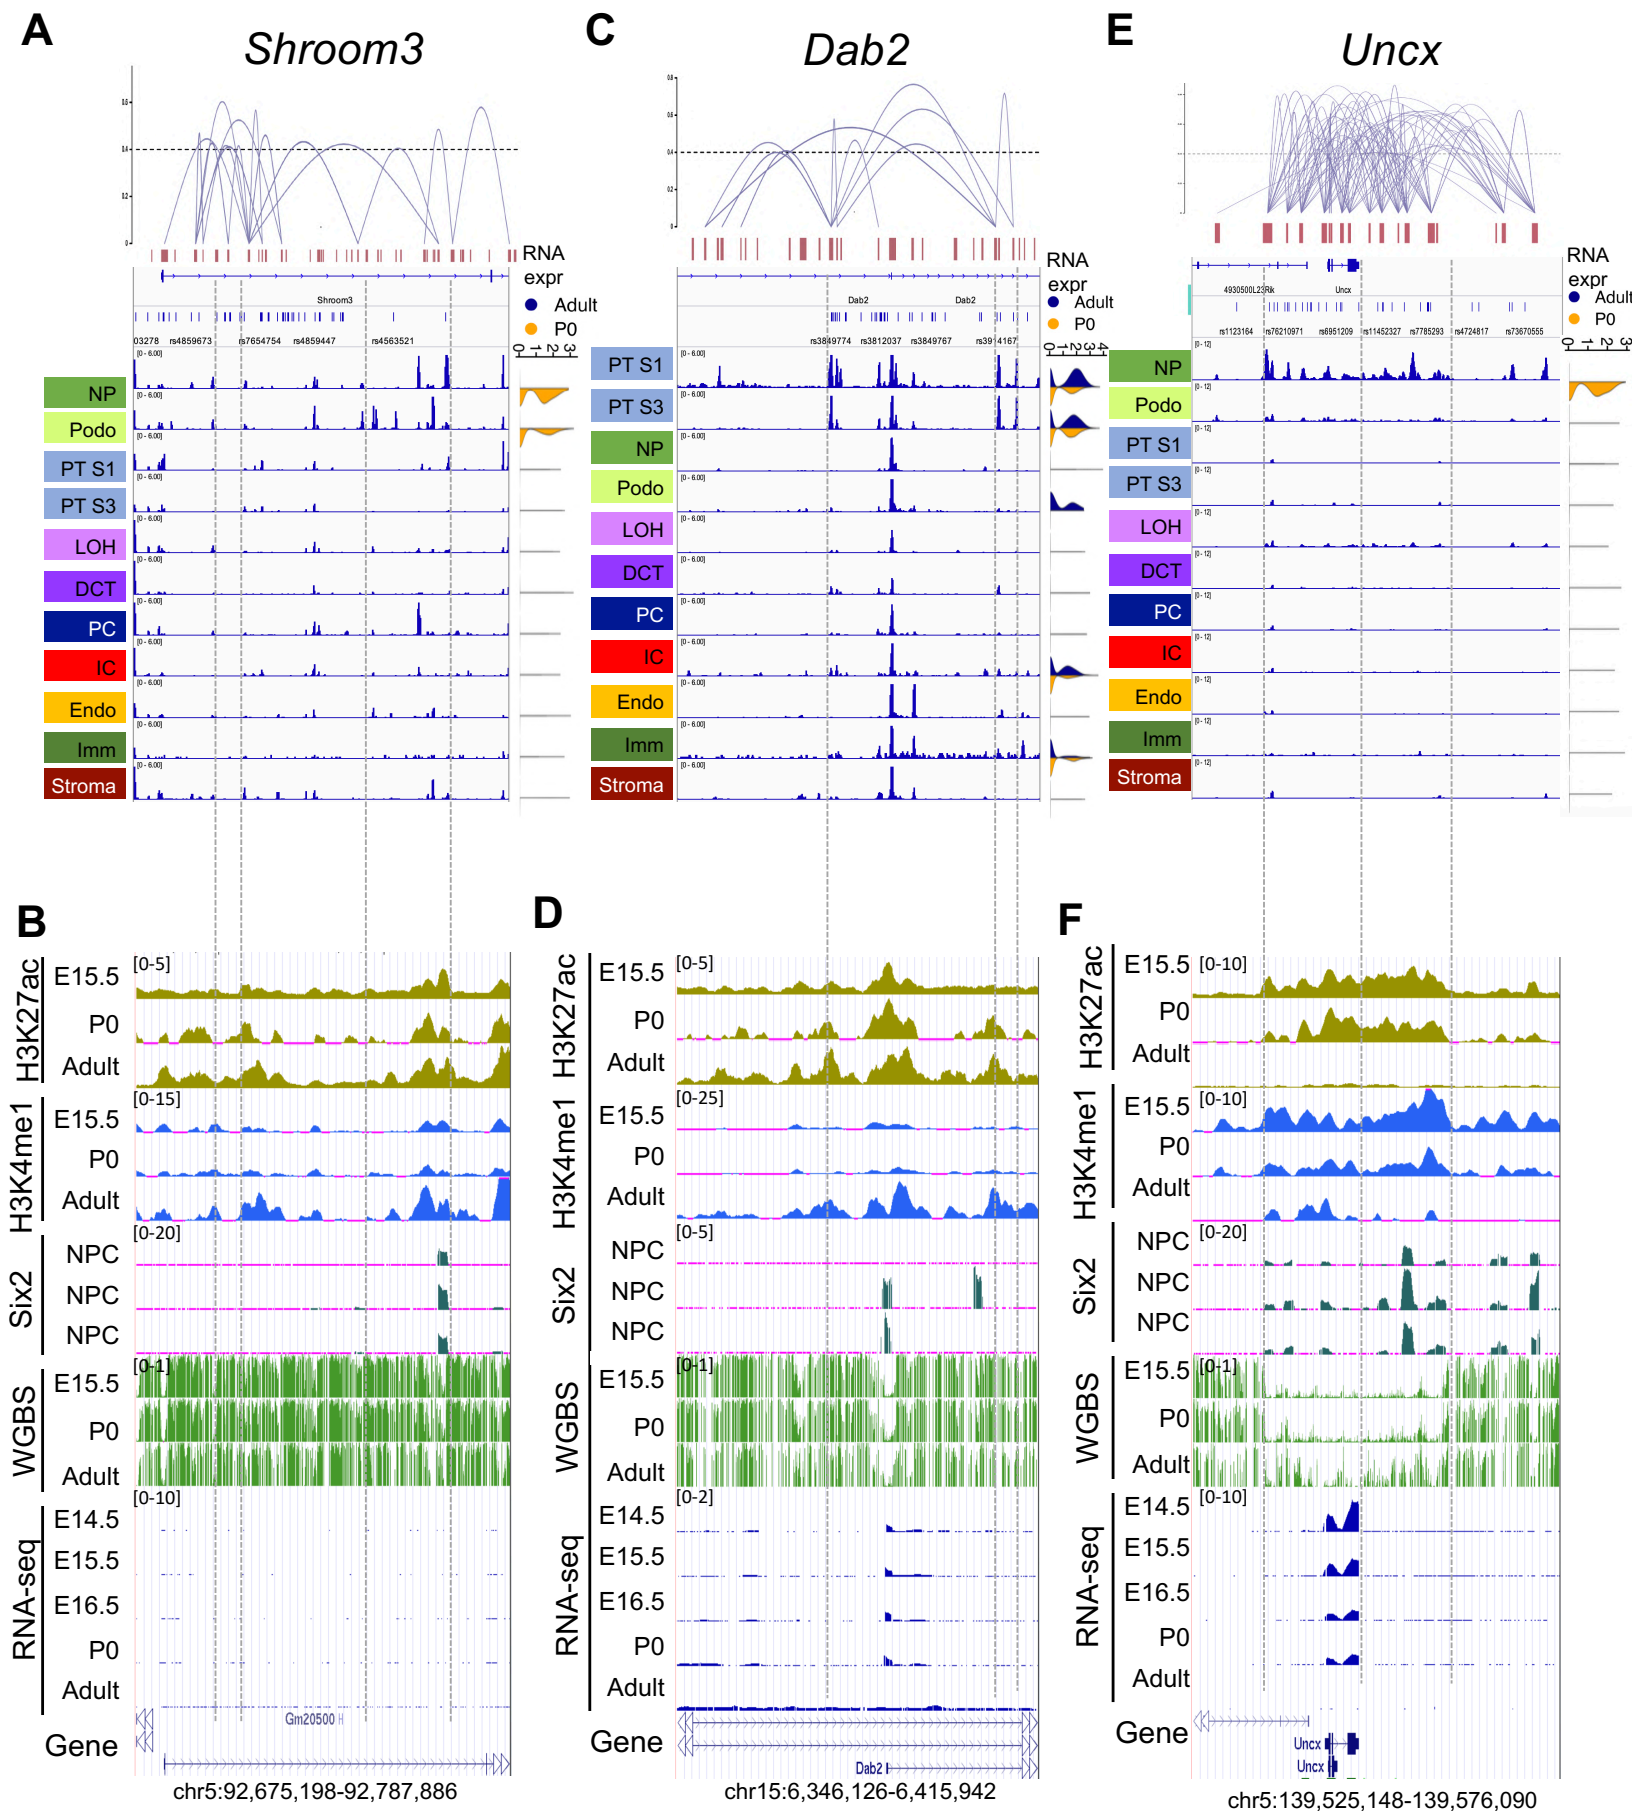

Source: http://biorxiv.org/content/10.1101/2020.05.24.113910v3.full.pdf
