1 **Single cell resolution regulatory landscape of the mouse kidney highlights cellular**  
2 **differentiation programs and renal disease targets**

3  
4 Zhen Miao<sup>1,2,3,\*</sup>, Michael S. Balzer<sup>1,2,\*</sup>, Ziyuan Ma<sup>1,2</sup>, Hongbo Liu<sup>1,2</sup>, Junnan Wu<sup>1,2</sup>, Rojesh  
5 Shrestha<sup>1,2</sup>, Tamas Aranyi<sup>1,2</sup>, Amy Kwan<sup>4</sup>, Ayano Kondo<sup>4</sup>, Marco Pontoglio<sup>5</sup>, Junhyong Kim<sup>6</sup>,  
6 Mingyao Li<sup>7</sup>, Klaus H. Kaestner<sup>2,4</sup> and Katalin Susztak<sup>1,2,4</sup>

7  
8  
9 <sup>1</sup>Renal, Electrolyte, and Hypertension Division, Department of Medicine, University of  
10 Pennsylvania, Perelman School of Medicine, Philadelphia, PA 19104, USA

11 <sup>2</sup>Institute for Diabetes, Obesity, and Metabolism, University of Pennsylvania, Perelman School of  
12 Medicine, Philadelphia, PA 19104, USA

13 <sup>3</sup>Graduate Group in Genomics and Computational Biology, University of Pennsylvania, Perelman  
14 School of Medicine, Philadelphia, PA 19104, USA

15 <sup>4</sup>Department of Genetics, University of Pennsylvania, Perelman School of Medicine,  
16 Philadelphia, PA 19104, USA

17 <sup>5</sup>Epigenetics and Development Laboratory, Université de Paris Inserm U1151/CNRS UMR  
18 8253, Institut Necker Enfants Malades, Paris, France

19 <sup>6</sup>Department of Biology, University of Pennsylvania, Philadelphia, PA 19104, USA

20 <sup>7</sup>Department of Epidemiology and Biostatistics, University of Pennsylvania, Perelman School of  
21 Medicine, Philadelphia, PA 19104, USA

22 #These two authors contributed equally to this work

23

24 **Correspondence:**

25 **Katalin Susztak, MD, PhD**

26 Professor of Medicine

27 University of Pennsylvania, Perelman School of Medicine

28 3400 Civic Center Blvd,

29 Smilow Translational building 12-123,

30 Philadelphia, PA 19104

31 Phone: (215) 898-2009

32 [ksusztak@pennmedicine.upenn.edu](mailto:ksusztak@pennmedicine.upenn.edu)

33 **Grant support:**

34 Work in the Susztak lab is supported by the NIH DK076077, DK087635, and DK105821. MSB is  
35 supported by a German Research Foundation grant (BA 6205/2-1).

36 **Abstract**

37 The kidney has a very limited capacity to repair. Defining cellular differentiation during  
38 development therefore could aid the understanding of homeostatic and maladaptive regeneration.

39  
40 Here, we profiled open chromatin and gene expression in developing and adult mouse kidneys at  
41 single cell resolution. We show critical reliance of gene expression on distal regulatory elements  
42 (enhancers). We define key cell type-specific transcription factors and major gene-regulatory  
43 circuits for kidney cells. Dynamic chromatin and expression changes during nephron progenitor  
44 differentiation demonstrated that podocyte commitment occurs early and is associated with  
45 sustained *Foxl1* expression. Renal tubule cells followed a more complex differentiation, where  
46 *Hfn4a* was associated with proximal and *Tfap2b* with distal fate. Mapping single nucleotide  
47 variants associated with human kidney disease identified critical cell types, developmental stages,  
48 genes, and regulatory mechanisms.

49  
50 We provide a global single cell resolution view of chromatin accessibility of kidney development.  
51 The dataset is available via an interactive public website.

52  
53  
54 **Keywords**

55 Kidney development; differentiation; single cell; chromatin accessibility; transcription factor;  
56 gene regulatory network; cis-regulatory elements; enhancer; kidney disease.

## 57 **Introduction**

58

59 The mammalian kidney maintains fluid, electrolyte, and metabolite balance of the body and plays  
60 an essential role in blood pressure regulation and red blood cell homeostasis. The human kidney  
61 makes roughly 180 liters of primary filtrate each day that is then reabsorbed and modified by a  
62 long tubule segment. To perform this highly choreographed and sophisticated function, the kidney  
63 contains close to 20 highly specialized epithelial cells. The renal glomerulus acts as a 60 kD size-  
64 selective filter. The proximal part of the tubules is responsible for reclaiming more than 70% of  
65 the primary filtrate, which is done via unregulated active and passive paracellular transport <sup>1</sup>, while  
66 the loop of Henle plays an important role in concentrating the urine. The distal convoluted tubule  
67 is critical for regulated electrogenic sodium reabsorption and potassium secretion. The last  
68 segment of kidney tubules is the collecting duct where the final concentration of the urine is  
69 determined via regulation of water channels as well as acid or base secretion. Understanding the  
70 development of these diverse cell types in the kidney is essential to understand kidney homeostasis,  
71 disease, and regeneration.

72

73 The mammalian kidney develops from the intermediate mesoderm via a complex interaction  
74 between the ureteric bud and the metanephric mesenchyme <sup>2</sup>. In the mouse kidney, *Six2* marks the  
75 self-renewing nephron progenitor population <sup>3</sup>. The nephron progenitors commit and undergo a  
76 mesenchymal-to-epithelial transformation giving rise to the renal vesicle <sup>3</sup>. The renal vesicle then  
77 undergoes segmentation and elongation, giving rise to epithelia from the podocytes to the distal  
78 convoluted tubules, while the ureteric bud becomes the collecting duct. Unbiased and hypothesis-  
79 driven studies have highlighted critical stages and drivers of early kidney development <sup>4</sup>, that have  
80 been essential for the development of *in vitro* kidney organoid differentiation protocols <sup>5-7</sup>.  
81 However, cells in organoids are still poorly differentiated, improving cellular differentiation and  
82 maturation of these structures remains a major challenge <sup>8</sup>. Thus, the understanding of late kidney  
83 development, especially the cell type-specific driver transcription factors (TFs) is of great  
84 importance <sup>9-11</sup>. Alteration in Wnt, Notch, Bmp, and Egf signaling significantly impacts cellular  
85 differentiation, but only a handful of TFs that directly drive the differentiation of distinct segments  
86 have been identified, such as *Pou3f3*, *Lhx1*, *Irx2*, *Foxc2* and *Mafb* <sup>12</sup>. Further understanding of the  
87 terminal differentiation program could aid the understanding of kidney disease development.

88

89 While single cell RNA sequencing (scRNA-seq) has improved our understanding of kidney  
90 development in mice and humans <sup>9,10,13,14</sup>, it provides limited information of TFs, which are usually  
91 lowly expressed. Equally difficult is to understand how genes are regulated from scRNA-seq data  
92 alone. Chromatin state profiles, on the other hand, provide valuable insight to gene regulation  
93 mechanisms during cell differentiation, since they show not only the accessibility of the gene  
94 transcription start site (TSS), but also of distal regulatory regions such as enhancers. It is believed  
95 that enhancers are critical for establishing the cell type-specific gene expression pattern, but it has  
96 not been shown conclusively on a single cell level. Together with gene expression, open chromatin  
97 profiles can define the gene regulatory logic, which is the fundamental element of cell identity.  
98 However, there is a scarcity of open chromatin information by Assay for Transposase-Accessible  
99 Chromatin using sequencing (ATAC-seq) or chromatin immunoprecipitation (ChIP) data by ChIP-  
100 seq related to kidney development. In addition, epigenetic changes observed in bulk analyses  
101 mostly represent changes in cell composition, rather than cell type-specific changes <sup>15</sup>, making it  
102 challenging to interpret bulk ATAC-seq data.

103

104 To this end, here we generated a single cell open chromatin and corresponding expression survey  
105 for the developing and adult mouse kidney, which will be available for the community via a  
106 searchable website ([http://susztaklab.com/VisCello\\_snATAC/](http://susztaklab.com/VisCello_snATAC/) and <http://susztaklab.com/igv/>).  
107 Using this atlas, we have produced a new epigenome-based classification of developing and  
108 mature cells and defined cell type-specific regulatory networks. We also investigated key TFs and  
109 cell-cell interactions associated with developmental cellular transitions. Finally, we used the single  
110 cell open chromatin information to pinpoint putative target genes and cell types of several chronic  
111 kidney disease noncoding genome-wide association study (GWAS) loci.

112 **Results**

113

114 **Single cell accessible chromatin landscape of the developing and adult mouse kidneys**

115

116 To characterize the accessible chromatin landscape of the developing and adult mouse kidneys at  
117 single cell resolution, we performed single nuclei ATAC-seq (snATAC-seq) on kidneys of mice  
118 on postnatal day 0 (P0) at 3 and 8 weeks of age (**Figure 1a, Methods**). In parallel, we also  
119 performed bulk (whole kidney) ATAC-seq analysis at matched developmental stages. Following  
120 sequencing, we aggregated all high-quality mapped reads in each sample irrespective of barcode.  
121 The combined snATAC-seq dataset from all samples showed the expected insert size periodicity  
122 (**Figure S1a**) with a strong enrichment of signal at TSSs (**Figure S1b**), indicating high data quality.  
123 The snATAC-seq data showed high concordance with the bulk ATAC data (Spearman correlation  
124 coefficient  $>0.84$ , **Methods, Figure S1c**).

125

126 We next revealed cell type annotations from the open chromatin information. After conducting  
127 stringent filtering of the number of barcodes, promoter ratio and mitochondria ratio (**Methods,**  
128 **Figure S1d**), we kept 28,316 cells across the samples (**Figures 1b, S1f-g**). Cells were then  
129 clustered using snapATAC<sup>16</sup>, which binned the whole genome into 5 kb regions and used diffusion  
130 map and principal component analysis for dimension reduction (**Methods**). Prior to clustering, we  
131 used Harmony<sup>17</sup>, an iterative batch correction method, to correct for variability across samples.  
132 Using batch-corrected low dimensional embeddings, we clustered all cells together and retained  
133 13 clusters, all of which had consistent representation across the number of peaks, samples and  
134 read depth profiles (**Figures 1b, S1e-g**). As expected, some clusters such as nephron progenitors  
135 and stromal cells were enriched in the developing kidney (P0).

136

137 In order to identify the cell type-specific open chromatin regions, we conducted peak calling using  
138 MACS2<sup>18</sup> on each cell type separately. The peaks were then merged to obtain a comprehensive  
139 open chromatin set. We found that the single nuclei open chromatin set showed good concordance  
140 with bulk ATAC-seq samples, with most of the peaks in bulk ATAC-seq data captured by the  
141 single nuclei data. On the other hand, single nuclei chromatin accessibility data showed roughly  
142 50% more accessible chromatin peaks (total of 300,693 peaks) than the bulk ATAC-seq data

143 (Figure 1e, Methods), indicating that the snATAC-seq data was particularly powerful in  
144 identifying open chromatin areas that are accessible in single cell types.

145  
146 To determine the cell types represented by each cluster, we examined chromatin accessibility  
147 around the TSS and gene body regions of the cognate known cell type-specific marker genes<sup>19</sup>.  
148 Based on the accessibility of the known marker genes, we identified clusters representing nephron  
149 progenitors, endothelial cells, podocytes, proximal tubule segment 1 and segment 3 cells, loop of  
150 Henle, distal convoluted tubule, connecting tubule, collecting duct principal cells, collecting duct  
151 intercalated cells, stromal and immune cells (Figure 1b). Figures 1d and S1h show chromatin  
152 accessibility information for key cell type marker genes, such as *Uncx* and *Cited1* for nephron  
153 progenitors, *Nphs1* and *Nphs2* for podocytes, *Akr1c21* for both segments of proximal tubules,  
154 *Slc34a1* and *Slc5a2* for segment 1 of proximal tubules, *Kap* for segment 3 of proximal tubules,  
155 *Slc12a1* and *Umod* for loop of Henle, *Scl12a3* and *Pvalb* for distal convoluted tubule, *Trpv5* for  
156 connecting tubule, *Aqp2* and *Fxyd4* for principal cells, *Atp6v1g3* and *Atp6v0d2* for intercalated  
157 cells, *Egfl7* for endothelial cells, *Clqb* for immune cells and *Col3a1* for different types of stromal  
158 cells, respectively<sup>19</sup>.

159  
160 To understand cell type-specific gene expression changes, we also generated a single cell RNA  
161 sequencing (scRNA-seq) atlas for mouse kidney samples at the same developmental stages. The  
162 single cell transcriptome profiles of P0 and adult mouse kidneys were derived and processed as  
163 described in Methods. Rigorous quality control yielded a set of 43,636 single cells (Figures 1b,  
164 S1i). Quality control metrics such as gene counts, UMI counts and mitochondrial gene percentage  
165 along with batch correction results are shown in Figures S1j-m. By unbiased clustering<sup>20</sup> we  
166 obtained 17 distinct cell populations in the combined P0 and adult mouse datasets (Figure S1i).  
167 On the basis of marker gene expression, we identified kidney epithelial, immune and endothelial  
168 cells (Figures 1f, S1n-o), closely resembling the clustering obtained from snATAC-seq analysis.  
169 We then conducted differential expression analysis on the clusters and identified key marker genes  
170 for each cell type (Supplemental Table 1).

171  
172 To compare the consistency between cluster assignment in the snATAC-seq data and the scRNA-  
173 seq data, we next derived a gene activity score for the top 3,000 highly variable genes in each

174 snATAC-seq cluster and computed the Pearson's correlation coefficient between each snATAC  
175 cluster and scRNA cluster (**Methods**). This analysis indicated good concordance between the two  
176 datasets (**Figures 1g, S1p**). While the correlation between gene expression and inferred gene  
177 activity score was high, we noted some differences in cell proportions, which was mostly related  
178 to the sample preparation-induced cell drop-out (**Figures S1g, i**). Consistent with previous  
179 observations that single cell preparations better capture immune cells than single nuclear  
180 preparations <sup>21</sup>, we noted that the immune cell repertoire was limited in the snATAC-seq dataset;  
181 on the other hand, stromal cells were better captured by the nuclear preparation.

182  
183 Finally, to allow the interactive use of this dataset by the community, we not only made the raw  
184 data available but also the processed dataset via our searchable website  
185 ([http://susztaklab.com/VisCello\\_snATAC/](http://susztaklab.com/VisCello_snATAC/) and <http://susztaklab.com/igv/>). For example, here  
186 we show the chromatin accessibility landscape of *Ace2*, which is of major interest currently due to  
187 the COVID19 epidemic. We can observe an open chromatin region around the transcription start  
188 site of *Ace2* only in proximal tubules, which is consistent with its expression in proximal tubules  
189 (**Figure S1q**).

190

### 191 **Characterization of the cell type-specific regulatory landscape**

192

193 To characterize different genomic elements captured by snATAC-seq data, we first stratified the  
194 genome into promoters, exons, 5' and 3' untranslated regions, introns, and distal regions using the  
195 GENCODE annotation <sup>22</sup> (**Methods**). We noticed that consistent with bulk ATAC-seq data, most  
196 peaks in snATAC-seq data were in regions characterized as distal elements or introns, (**Figure**  
197 **S2a**) and relatively small portions (<10%) were in promoter or 5' untranslated regions. The  
198 genomic elements proportion was stable across developmental stages. In addition, almost half of  
199 the open chromatin peaks overlapped with P0 or adult H3K27Ac ChIP-seq signals (**Figure S2b**),  
200 indicating the contribution of enhancer regions to accessible chromatin.

201

202 To study the open chromatin heterogeneity in different cell types, we derived a cell type-specific  
203 accessible chromatin landscape by conducting pairwise Fisher's exact test for each peak between  
204 every cluster (Benjamini-Hochberg adjusted  $q$  value  $\leq 0.05$ , **Methods**). In total, we identified

205 60,684 differentially accessible open chromatin peaks (DAPs) across the 13 cell types  
206 (**Supplemental Table 2, Figure 2a**). Among these peaks, most showed high specificity for a single  
207 cluster. However, we noticed overlaps between the S1 and S3 proximal tubule segments-specific  
208 peaks, as well as between the loop of Henle and distal convoluted tubule segments, which is  
209 consistent with their biological similarities. In addition to the cell type-specific peaks, we also  
210 found some cell-type independent open chromatin areas (present across nephron progenitors,  
211 podocytes, proximal tubule and loop of Henle cells), likely consistent with basal housekeeping  
212 genes and regulatory elements. (**Figures 2a, S2c**).

213  
214 We noticed that many genes had strong cell type-specific DAPs at their TSS. Other genes, however,  
215 had accessible chromatin at their TSS in multiple cell types. For example, *Umod*, the loop of  
216 Henle-specific marker gene, showed accessible chromatin at its TSS at multiple tubule cell types  
217 (**Figure S2d, S1h**). Rather than with its TSS, cell type-specific chromatin accessibility of *Umod*  
218 strongly correlated with an upstream open chromatin peak, which is likely an enhancer region,  
219 indicated by the H3K27Ac ChIP-seq signal (**Figure S2d**). Consistently, we noticed the enrichment  
220 of intronic regions and distal elements (**Figures S2e-f**) in cell type-specific DAPs, indicating their  
221 role in cell type-specific gene regulation.

222  
223 These observations motivated us to study cis-regulatory elements using the snATAC-seq data and  
224 scRNA-seq data. We reasoned that a subset of the cell type-specific cis-regulatory elements should  
225 regulate cell type-specific gene expression in cis. Inspired by <sup>23</sup>, we aligned DAPs and  
226 differentially expressed genes from our snATAC-seq and scRNA-seq datasets, and inferred the  
227 putative regulatory peaks by their proximity (**Methods**). Such cis-regulatory elements predictions  
228 were confirmed by comparing with cis-regulatory elements inferred previously <sup>24</sup>, as we  
229 recapitulated roughly 20% of elements from their analysis. In addition, our analysis was able to  
230 identify several known enhancers such as for *Six2* and *Slc6a18* <sup>24,25</sup> (**Figure S2g**). To quantify the  
231 contribution of cis-regulatory elements, we analyzed peak co-accessibility patterns using Cicero  
232 <sup>26</sup>. By using a heuristic co-accessible score 0.4 as a cutoff, we identified 1,214,638 and 926,288  
233 cis-regulatory element links in the P0 and adult data, respectively. Some of these are likely  
234 promoter-enhancer regulatory units. Among these co-accessible elements, only 149,389 were  
235 common in P0 and adult kidneys, while most were developmental stage-dependent. While this



236 observation needs further experimental validation, it highlights dynamic changes in gene  
237 regulation during development, which includes both chromatin opening and looping.

238  
239 Given the large contribution of distal regulatory elements to chromatin accessibility, we next  
240 looked into identifying key TFs that occupy the cell type-specific open chromatin regions. Until  
241 now, information on cell type-specific TFs in the kidney has been scarce. Therefore, we performed  
242 motif enrichment analysis on the cell type-specific open chromatin regions using HOMER <sup>27</sup>.  
243 HOMER was designed as a differential motif discovery algorithm that scores motifs by computing  
244 enrichment of motif sequences in target compared to a reference set. To reduce false discovery,  
245 we focused on the known motifs. The full list of cell type-specific TF binding motifs is shown in  
246 **Supplemental Table 3**. Since several TFs have identical or similar binding sequences, we next  
247 correlated motif enrichment with scRNA-seq TF expression. Using this combined motif  
248 enrichment and gene expression approach, we have defined the mouse kidney cell type-specific  
249 TF landscape. Examples include *Six2* and *Hoxc9* in nephron progenitors, *Wt1* and *Mafb* in  
250 podocytes, *Hnf4a*, *Ppara*, and *Bhle41* in proximal tubules, *Esrrb* and *Foxa1* in loop of Henle, *Vdr*  
251 in distal convoluted tubule, *Elf5* in principal cells, *Tcfcp2l1* in intercalated cells, *Erg* and *Sox17* in  
252 endothelial cells, *Spi1* and *Batf* in immune cells, and *Twist1* and *Nr2f2* in stromal cells (**Figures**  
253 **2a, S2h**).

254  
255 In order to study the putative target genes of TFs, we examined TF regulon activity using Single-  
256 Cell rEgulatory Network Inference and Clustering (SCENIC) <sup>28</sup>. SCENIC was designed to reveal  
257 TF-centered gene co-expression networks. By inferring a gene correlation network followed by  
258 motif-based filtration, SCENIC keeps only potential direct targets of each TF as modules  
259 (regulons). The activity of each regulon in each cell was quantified and then binarized to “on” or  
260 “off” based on activity distribution across cells (**Methods**). SCENIC was also able to conduct  
261 clustering based on the regulon states of each cell. SCENIC results (**Figure 2b**) indicated strong  
262 enrichment in *Trps1*, *Hnf1b*, *Maf*, *Hnf1a*, and *Hnf4a* regulon activity in proximal tubules, *Hmga2*,  
263 *Hoxc6*, *Hoxd11*, *Meox1*, *Six2*, *Tcf4*, and *Uncx* in nephron progenitors, *Esrrg*, and *Ppargc1a* in loop  
264 of Henle, *Hmgb3* in proliferating cells and *Foxc1*, *Foxc2*, *Foxd1*, *Lef1*, and *Mafb* in podocytes,  
265 respectively. While the expression of several of these TFs was relatively low and was further  
266 exacerbated by transcript drop-outs, many TFs did not show strong cell type enrichment. The

267 regulon-based analysis, however, showed a very clear enrichment. SCENIC also successfully  
268 reported multiple downstream target genes. The full list of regulons and their respective target  
269 genes can be found in **Supplemental Table 4**, scaled and binarized regulon activity is also  
270 available in **Supplemental Table 5**. Examples of regulon activity, corresponding TF expression,  
271 and target gene expression are depicted in **Figures 2c, S2i**. For example, TFs such as *Eya1*, *Hoxc8*,  
272 *Hoxc9*, *Pax2*, *Spock2* and *Wnt4* are important downstream targets within the regulon of nephron  
273 progenitor-specific TF *Uncx*, indicating an important transcriptional hierarchy of nephron  
274 development <sup>29</sup>.

275  
276 In summary, we generated a comprehensive atlas for the cell type-specific regulatory elements and  
277 TF-centered regulatory network.

278

### 279 **The regulatory trajectory of nephron progenitor differentiation**

280

281 All cells in the body differentiate from the same genetic template. Cell type-specific chromatin  
282 opening and closing events associated with TF binding changes set up the cell type-specific  
283 regulatory landscape resulting in cell type specification and development. We found that closing  
284 of open chromatin regions was the predominant event during the nephron progenitor  
285 differentiation (**Figure S2a**). We then evaluated the cellular differentiation trajectory in the  
286 snATAC-seq and scRNA-seq datasets (**Methods**). We identified multiple nephron progenitor sub-  
287 groups (**Figures 3a-b**), which will need to be carefully mapped to prior gene expression- and  
288 anatomical location-driven nephron progenitor sub-classification. Consistently, across both data  
289 modalities, we identified that the podocyte precursors differentiated early from the nephron  
290 progenitor pool (**Figures 3a-b**). The tubule cell trajectory was more complex with a shared  
291 intermediate stage and later differentiation into proximal tubules and distal tubules/loop of Henle  
292 (**Figures 3a-b, S3a-c**). We also integrated snATAC-seq and scRNA-seq data to obtain a single  
293 trajectory (**Methods**). The cell types in this dataset were correctly mapped and the trajectory  
294 resembled the path observed in individual analyses of the scRNA and snATAC datasets (**Figures**  
295 **S3e-g**). The robustness of developmental trajectories was further supported by obtaining similar  
296 results when performing RNA velocity analysis using Velocityto <sup>30</sup> (**Figure S3d**) and by comparing  
297 with previous human and mouse kidney developmental studies <sup>9,13,14</sup>.

298

299 Building on both the SCENIC-generated gene regulatory network and the robust differentiation  
300 trajectories of the snATAC-seq and scRNA-seq datasets, we next aimed to understand chromatin  
301 dynamics, identify TFs and driver pathways for cell type specification and differentiation. To this  
302 end, we first determined variation in chromatin accessibility along the 3 differentiation trajectories  
303 using ChromVAR <sup>31</sup>. ChromVAR estimates the accessibility dynamics of motifs in snATAC-seq  
304 data (**Methods**). We observed three different patterns when analyzing genes of interest (**Figure**  
305 **3c**): 1) *Decrease of TF motif accessibility in all lineages*. For example, *Sox11* motif enrichment  
306 score was high in nephron progenitor cells at the beginning of all 3 trajectories. It then decreased  
307 in all 3 lineages in parallel, underlining the role of *Sox11* in early kidney development. Several  
308 other TFs followed this pattern such as *Six2* and *Sox9*. 2) *Cell type-specific maintenance of*  
309 *chromatin accessibility with advancing differentiation*. We observed that chromatin accessibility  
310 for the *Wt1* motif was high initially, but declined in proximal tubule and loop of Henle lineages,  
311 while its expression increased in the podocyte lineage. This is consistent with the important role  
312 of *Wt1* in nephron progenitors and podocytes <sup>32,33</sup>. Other TFs that followed this pattern include  
313 *Foxc2* and *Foxl1*. 3) *A de novo increase in chromatin accessibility with cell type commitment and*  
314 *advancing differentiation*. For example, the chromatin accessibility of *Hnf4a* and *Pou3f3* motif  
315 increased in proximal tubule and loop of Henle trajectories, respectively, coinciding with the  
316 cellular differentiation program <sup>34</sup>. A large number of TFs followed this pattern such as *Mafb* (in  
317 podocytes), *Hnf4a* and *Hnf1a* (in proximal tubule), *Hnf1b* (in both proximal tubule and loop of  
318 Henle) as well as *Esrrb* and *Tfap2b* (in loop of Henle).

319

320 Next, we correlated changes in chromatin accessibility-based TF motif enrichment with TF  
321 expression and their respective target genes along Monocle-generated trajectories. To this end, we  
322 used the scRNA-seq differentiation trajectories to find TFs and target genes differentially  
323 expressed over pseudotime (**Supplemental Table 6**). We also noticed a good concordance of time-  
324 dependent changes of TF and target gene expression along with TF motif enrichment, including  
325 the lineages for podocytes (e.g., *Foxc2*, *Foxl1*, *Mafb*, *Magi2*, *Nphs1*, *Nphs2*, *Plat*, *Synpo*, *Thsd7a*,  
326 *Wt1*, and *Zbtb7c*), proximal tubule (e.g., *Ace2*, *Atp1a1*, *Dab2*, *Hnf1a*, *Hnf4a*, *Hsd17b2*, *Lrp2*, *Maf*,  
327 *Slc12a3*, *Slc22a12*, *Slc34a1*, and *Wnt9b*), loop of Henle (e.g., *Cyfip2*, *Cytip*, *Esrrb*, *Esrrg*, *Irx1*,  
328 *Irx2*, *Mecom*, *Pla2g4a*, *Pou3f3*, *Ppargc1a*, *Stat3*, *Sytl2*, *Tfap2b*, *Thsd4*, and *Umod*), as well as for

329 both proximal tubule and loop of Henle (e.g., *Bhlhe40*, *Hnf1b*, and *Tmprss2*), respectively (**Figures**  
330 **3c, S3i**). Most interestingly, we noticed two distinct patterns of how gene expression was related  
331 to chromatin accessibility. While gene expression of TFs increased over pseudotime, its  
332 corresponding motif accessibility either increased in parallel (such as *Hnf4a* and *Pou3f3*) or  
333 maintained in a lineage-specific manner (such as *Wt1*). This might indicate different regulatory  
334 mechanisms during differentiation.

335  
336 We next aimed to interrogate the stage-dependent chromatin dynamics along the identified  
337 differentiation trajectory. The differentiation trajectory was binned into 15 developmental steps  
338 based on the lineage specification (**Figures S3b-c**). These stages were labeled as NP (nephron  
339 progenitor), IM (intermediate cells), Podo (podocytes), PT (proximal tubule), LOH (loop of Henle),  
340 and DCT (distal convoluted tubule), however, this designation will need to be matched with prior  
341 cell marker-based annotations. To study the chromatin opening and closing, we conducted  
342 differential chromatin accessibility analysis between subsequent stages. To understand the  
343 biological processes controlled by the epigenetic changes, we examined the nearest genes and  
344 performed functional annotation (**Methods**). We found that open chromatin profiles were  
345 relatively stable in the early precursor stages such as NP1 to NP3, with fewer than 70 DAPs  
346 identified (**Supplemental Table 7, Figure S4a**). The podocyte differentiation branch was  
347 associated with marked increase in the number of DAPs, (796 DAPs between NP3 and Podo1).  
348 This mainly represented the closing of chromatin areas around nephron progenitor-specific genes  
349 such as *Osr1*, *Gdnf*, *Sall1*, *Pax2* and opening of areas around podocyte-specific genes and key TFs  
350 such as *Foxc2* and *Efnb2*, both of which are validated to be important for early podocyte  
351 differentiation<sup>35,36</sup>. At later stages, there was a strong increase in expression of actin filament-  
352 based processes and a significant decrease in *Notch* and *Ctnnb1* in the podocyte lineages  
353 (**Supplemental Table 8**). Fewer chromatin closing events were observed (234 DAPs) between  
354 NP3 and intermediate cells 1 (IM1), mainly associated with closing of the chromatin around *Osr1*  
355 and opening around tubule cell-specific TFs such as *Lhx1* and *Pax3* (**Figure 4**). The decrease in  
356 *Six2* expression only occurred at the IM2 stage, at which we also observed an increase in tubule  
357 specification genes such as *Hnf1a*. Gene ontology results from the 820 up-regulated peaks between  
358 PT1 and IM2 showed enrichment associated with typical proximal tubule functions including  
359 sodium-dependent phosphate transport, maintenance of osmotic response in the loop of Henle and

360 active sodium transport in the distal convoluted tubule (**Figure S4a**, the full list can be found in  
361 **Supplemental Tables 7, 8 and 9**).

362  
363 In addition to analyzing changes along the trajectory, we also specifically examined cell-fate  
364 decision events. We studied the chromatin opening and closing during the first cell commitment  
365 event. We found that podocyte specification from nephron progenitors was associated with  
366 differential opening of *Foxl1*, *Zbt7c*, and *Smad2* in the podocyte lineage and *Lhx1*, *Sall1*, *Dll1*,  
367 *Jag1*, *Cxcr3* and *Pax3* in the other lineage, respectively. While the role of several TFs has been  
368 established for podocyte specification, the expression of *Foxl1* has not been described in the kidney  
369 until now (**Figure 4**). Our analysis pinpointed that four peaks in the vicinity of *Foxl1* were  
370 accessible only in podocyte lineage, which locate in +53,381 bp, +152,832 bp, +237,019 bp, and  
371 +268,550 bp of the *Foxl1* TSS, respectively. To confirm the expression of *Foxl1* in nephron  
372 progenitors and podocytes, we performed immunofluorescence studies on developing kidneys  
373 (E13.5, P0 and P6). Consistent with the computational analysis, we found strong expression of  
374 FOXL1 in nephron progenitors (E13.5). At later stages, it was present in comma and S shape body  
375 and finally in the glomerular podocytes (**Figure S4b**). Consistently, while there was no expression  
376 within cells destined to become proximal tubule or loop of Henle cells, gene expression of *Foxl1*  
377 increased in cells along the podocyte trajectory (**Figure S4c**). While further experimental  
378 validation will be important, our study has illustrated the critical role of open chromatin state  
379 information and dynamics in cellular differentiation.

380  
381 The intermediate cells (IM) gave rise to proximal and distal branches, representing the proximal  
382 tubules and the loop of Henle as well as distal convoluted tubule segments. The proximal tubule  
383 region was characterized by chromatin opening around *Hnf4a*, *Maf*, *Tprkb*, and *Gpat2*. The loop  
384 of Henle and distal convoluted tubule segments were remarkable for multiple DAPs in the vicinity  
385 of *Tfap2a*, *Tfap2b*, *Cited4*, *Ephb2*, *Ephb3*, *Hoxd8*, *Mecom*, and *Prmd16*, indicating a critical novel  
386 role for these TFs in distal tubule differentiation (**Figures 3c, 4, S4c**). Consistently, we saw a  
387 reduction in chromatin accessibility of *Six2* promoter and enhancers along all three trajectories  
388 (podocyte, proximal tubule and loop of Henle) (**Figure S4d**). There was also a decrease in  
389 expression of *Jag1* and *Heyl* in the distal loop of Henle segment, consistent with the putative role  
390 of Notch driving the proximal tubule fate <sup>37</sup> (**Supplemental Table 11**). Another striking

391 observation was that tubule segmentation and specification occurred early by an increase in  
392 chromatin accessibility around *Lhx1*, *Hnf1a* and *Hnf4a* and *Maf* for proximal tubule and *Tfap2b*  
393 for loop of Henle. Terminal differentiation of proximal tubule and loop of Henle cells was strongly  
394 linked to nuclear receptors that regulate metabolism, such as *Esrra* and *Ppara* in proximal tubules  
395 and *Esrra* and *Ppargc1a* in the loop of Henle segment, once more indicating the critical role of  
396 metabolism of driving gene expression and differentiation <sup>38</sup>.

397  
398 In summary, we reconstructed the developmental and differentiation trajectories of podocytes,  
399 proximal tubule and loop of Henle cells. We defined chromatin and gene expression dynamics and  
400 identified numerous putative TFs for kidney cell specification and differentiation.

### 401 402 **Stromal-to-epithelial communication is critical in the developing and adult kidneys**

403  
404 Previous studies indicated that the survival, renewal, and differentiation of nephron progenitors is  
405 largely regulated through its cross-talk with the adjacent ureteric bud <sup>39</sup>. To investigate the complex  
406 cellular communication network, we used CellPhoneDB <sup>40</sup> to systematically infer potential cell-  
407 cell communication in the developing and adult kidney. CellPhoneDB provides a comprehensive  
408 database and a statistical method for the identification of ligand-receptor interactions in scRNA-  
409 seq data. Analysis of our scRNA-seq dataset indicated that the number of cell-cell interaction pairs  
410 was larger in developing kidney compared to the adult kidney (**Figure 5a**). In the developing  
411 kidney, the stroma showed the greatest number of interactions among all cell types. This is  
412 consistent with the well-known role of epithelial-stromal interactions in driving kidney  
413 development. Of the identified interactions, many were related to stroma-secreted molecules such  
414 as collagen 1, 3, 4, 6, and 14 (**Figure 5b**). Furthermore, the stroma seemed to interact with most  
415 cell types, such as podocytes and different tubule cells. Interestingly, the nephron progenitor  
416 cluster showed important ligand-receptor interaction between *Fgf1*, *Fgf8* as well as *Fgf9* and the  
417 corresponding receptor *Fgfr1*, which is consistent with the well-known role of FGF signaling in  
418 kidney development <sup>41</sup>. Of the manifold identified interactions in the fetal kidney, stromal  
419 interaction and the VEGF-involving interaction remained significant in the adult data set,  
420 underscoring the importance of endothelial-to-epithelial communication.

421

422 We next individually examined the expression of several key pathways known to play important  
423 roles in kidney development, such as Gdnf-Ret, sonic hedgehog, FGF, Bmp, Wnt and others 9.  
424 Expression of these key ligand-receptor pairs showed strong cell type specificity (**Figure 5c**). For  
425 example, *Robo2* of the Gdnf-Ret pathway was expressed in nephron progenitors and in podocytes  
426 of P0 and adult kidney. Gdnf signaling through the Ret receptor is required for normal growth of  
427 the ureteric bud during kidney development 42 and the Slit2/Robo2 pathway is implicated with  
428 congenital kidney anomalies (Hwang et al., Hum Genet 2015) and important for maintenance of  
429 podocyte foot process integrity 43. *Eya1*, however, is genetically upstream of *Gdnf* and acts as a  
430 positive regulator for its activation 44. Consistently, we noted distinct cell type specificity of *Eya1*  
431 expression only in nephron progenitors, which was also true for other important signaling  
432 molecules such as *Ptch1*, *Smo* and *Gli3* of the sonic hedgehog pathway. *Fgfr1* showed the highest  
433 expression in nephron progenitors as well as in fetal and adult stroma, underscoring the importance  
434 of FGF signaling for cell-cell interactions in both the developing and developed kidney. Most  
435 interestingly, some cell-cell interactions between specific cell types that were observed in fetal  
436 kidney were abrogated in adult kidney because of the loss of expression of either ligand or receptor,  
437 such as *Pdgfc* in nephron progenitor signaling to its receptor *Pdgfra* in stroma, *Npnt* from several  
438 epithelial cells signaling to *Itga8* in nephron progenitors, *Tnc-Itga9* signaling from nephron  
439 progenitors to stroma and *Rspo3* in stroma signaling to *Sdc4* in several epithelial cells. Because  
440 not much is known about some of these markers, the significance of these putative interactions  
441 requires further investigation. For example, *Rspo3* has been implicated in nephron progenitor-  
442 associated interactions during nephrogenesis 10. Mutations in the *Itga8* gene are known to cause  
443 isolated congenital anomalies of kidney and urinary tract in humans 45 and *Pdgfra* has been  
444 regarded as a commitment marker in kidney differentiation 10.

445

446 In summary, we inferred cell-cell interactions in the developing and adult kidneys and found the  
447 critical role of stromal-epithelial interactions in the developing kidney.

448

449 **Single cell chromatin accessibility identified human kidney GWAS target regulatory regions,**  
450 **genes and cell types**

451  
452 Finally, we examined whether single cell level chromatin accessibility data can help identify cell  
453 and gene targets for human kidney disease development. GWAS have been exceedingly successful  
454 in identifying nucleotide variations associated with specific diseases or traits. However, more than  
455 90% of the identified genetic variants are in the non-coding region of the genome. Initial  
456 epigenome annotation studies indicated that GWAS hits are enriched in tissue-specific enhancer  
457 regions. As there are many different cell types in the kidney with differing function, understanding  
458 the true cell type specificity of these enhancers is critically important. Here, we reasoned that  
459 single cell accessible chromatin information could be extremely useful to identify the cell type-  
460 specific enhancer regions and thereby the target cell type for the GWAS hits, however, such maps  
461 have not been generated for the human kidney. We combined three recent kidney disease GWAS  
462 <sup>46-48</sup>, and obtained 26,637 single nucleotide polymorphisms (SNPs) that passed genome-wide  
463 significance level of which we retained 7,923 after lift-over from human to mouse.

464  
465 Specifically, we examined loci where functional validation studies reported conflicting results on  
466 target cell types and target genes (**Figure 6**). The *SHROOM3* locus has shown a reproducible  
467 association with kidney function in multiple GWAS <sup>48</sup>. However, previous functional follow-up  
468 studies have reported confusing and somewhat contradictory results. While one study indicated  
469 that the genetic variants were associated with an increase in SHROOM3 levels in tubule cells  
470 inducing kidney fibrosis <sup>49</sup>, the other suggested that the variant was associated with lower  
471 SHROOM3 levels in podocytes resulting in chronic kidney disease development <sup>50</sup>. We found an  
472 open chromatin (likely promoter) area in multiple cell types such as nephron progenitors,  
473 podocytes, loop of Henle, distal convoluted tubule, principal cells and intercalated cells (**Figure**  
474 **6a**). We also identified intronic open chromatin areas only in nephron progenitors and podocytes  
475 that overlapped with the GWAS significant variants (**Figure 6a**). Consistent with the cis-  
476 regulatory open chromatin, the strongest expression of *Shroom3* was observed in podocytes and  
477 nephron progenitor cells. Expression of *Shroom3* in the adult bulk kidney was below our detection  
478 limit. To further understand the regulatory dynamics of this locus in the developing mouse kidneys,  
479 we examined gene expression and epigenome annotation data generated from bulk mouse kidney



480 samples at different stages of development for H3K27ac and H3K4me1 in adult and fetal samples  
481 (**Figure 6b**). Interesting to note that the GWAS-significant SNP that showed strong nephron  
482 progenitor-specific enrichment also coincided with the *Six2* binding area. Finally, the Cicero-based  
483 co-accessible analysis connected the GWAS top variants, which located in an intronic enhancer  
484 region of *Shroom3*, with *Shroom3* exons, indicating that *Shroom3* is the likely target gene of the  
485 variant (**Figure 6a**).

486  
487 Next, we analyzed the chromosome 15 GWAS region, where we identified some open chromatin  
488 regions that were uniformly open in all examined cell types. *Dab2* expression, on the other hand,  
489 strongly correlated with open distal enhancer regions in proximal tubule cells (**Figure 6c**). This is  
490 consistent with earlier publications indicating the role of proximal tubule-specific DAB2 playing  
491 a role in kidney disease development<sup>51</sup>. Interestingly, while single cell analysis indicated an  
492 additional distal enhancer in intercalated cells, the GWAS-significant region coincided with the  
493 proximal tubule-specific enhancer region and showed strong coregulation (**Figure 6d**). Regulatory  
494 annotation of the developing kidney indicated strong enhancer marks in the adult but not in the  
495 fetal kidney.

496  
497 Lastly, we examined the region around *Uncx*, for which reproducible association with kidney  
498 function was shown in multiple GWAS<sup>46,47</sup>. Interestingly, the GWAS locus demonstrated a strong  
499 open chromatin region in nephron progenitors but not in any other differentiated cell types (**Figure**  
500 **6e**). Consistently, in bulk chromatin accessibility data we only observed regulatory activity such  
501 as H3K27ac, H3Kme1 and we show *Six2*-binding at this locus in fetal kidneys. The locus did not  
502 show H3K27ac enrichment in the adult kidney, while H3K4me1 remained positive (**Figure 6f**).  
503 *Uncx* expression was strong in the fetal kidney samples, but we could not detect its expression in  
504 the adult kidney (**Figure 6e**). A closer view of these loci is shown in **Figure S6**.

505  
506 These results indicate that variants associated with kidney disease development are located in  
507 regions with cell type- and developmental stage-specific regulatory activity and illustrate the  
508 critical role of snATAC-seq in defining target genes and target cell types for GWAS variants.

## 509 **Discussion**

510

511 In summary, here we present the first cellular resolution open chromatin map for the developing  
512 and adult mouse kidney. Using this dataset, we identified key cell type-specific regulatory  
513 networks for kidney cells, defined the cellular differentiation trajectory, characterized regulatory  
514 dynamics and identified key driving TFs for nephron development, especially for the terminal  
515 differentiation of epithelial cells. Furthermore, our results shed light on the cell types and target  
516 genes for genetic variants associated with kidney disease development.

517

518 By performing massively parallel single cell profiling of chromatin state, we were able to define  
519 the key regulatory logic for each kidney cell type by investigating cis-regulatory elements and TF-  
520 target gene interaction. We found that most cell type-specific open chromatin regions are within  
521 distal regulatory elements and intronic regions. Our studies identified a massive amount of highly  
522 dynamic co-regulated peaks indicating the important correlation between distal regulatory  
523 elements and gene expression. Future studies will examine the relative contribution of promoters  
524 and enhancer openness in gene expression regulation. However, these studies highlight that both  
525 chromatin opening and looping are critical for gene regulation.

526

527 We also observed that the single cell open chromatin atlas was able to define more distinct cell  
528 types even in the developing kidney compared to scRNA-seq analysis. Given the continuous nature  
529 of RNA expression, it has been exceedingly difficult to dissect specific cell types in the developing  
530 kidney<sup>9,10,13</sup>. In addition, it has been difficult to resolve the cell type origin of lowly expressed  
531 transcripts in scRNA-seq data. However, this is not the case for snATAC-seq data, which were  
532 able to capture the chromatin state irrespective of gene expression magnitude. There were several  
533 examples where accessible peaks were identified in specific cell types even for lowly expressed  
534 genes such as *Shroom3*.

535

536 We identified critical cell type-specific TFs by integrating multiple computational analyses. TF  
537 identification is challenging in scRNA-seq data since the expression of several cell type-specific  
538 TFs is low and some of them do not show a high degree of cell type-specificity. By extracting  
539 motif information, snATAC-seq data provides additional information for TF identification.

540 Together with regulon analysis, as implemented in SCENIC, we have identified several TFs as  
541 well as their target genes that are important for kidney development. Leveraging this newly  
542 identified cell type-specific regulatory network will be essential for future studies of cellular  
543 reprogramming of precursors into specific kidney cell types and for better understanding  
544 homeostatic and maladaptive regeneration.

545  
546 Our studies revealed dynamic chromatin accessibility that tracks with renal cell differentiation.  
547 These states may reveal mechanisms governing the establishment of cell fate during development,  
548 in particular those underlying the emergence of specific cell types. We found a consistent and  
549 coherent pattern between gene expression and open chromatin information, where the nephron  
550 progenitors differentiated into two branches representing podocytes and tubule cells <sup>52</sup>. We found  
551 that podocyte commitment occurred earlier, while tubule differentiation and segmentation  
552 appeared to be more complex. This podocyte specification correlated with the maintenance of  
553 expression of *Foxc2* and *Foxl1* expression in podocytes. While *Foxc2* has been known to play a  
554 role in nephron progenitors and podocytes, this is the first description of *Foxl1* in kidney and  
555 podocyte development. Our studies are consistent with recent observations from organoid models  
556 that recapitulated podocyte differentiation better than tubule cell differentiation <sup>53</sup>. Our study also  
557 sheds light on tubule differentiation and segmentation. We confirmed the key role of *Hnf4a* in  
558 proximal tubules. We have identified a large number of new transcriptional regulators such as  
559 *Tfap2a* that seem to be critical for the distal portion of the nephron. Our data indicate that distal  
560 tubule differentiation is linked to the loop of Henle, a critically important observation needing  
561 further confirmation. Furthermore, the terminal differentiation of proximal tubule cells correlated  
562 with the increase in *Ppara* and *Esrra* expression, both of which are known regulators of oxidative  
563 phosphorylation and fatty acid oxidation <sup>38</sup>. Loop of Henle differentiation strongly correlated with  
564 *Essrb* and *Ppargc1a* expression. These studies potentially indicate that cell specification events  
565 occur early and metabolism controls terminal differentiation of tubule cells <sup>54</sup>. Impaired metabolic  
566 fitness of proximal tubules has been a key contributor to kidney dysfunction, explaining the critical  
567 association with tubule metabolism and function.

568  
569 Furthermore, we show that single cell and stage level epigenome annotation is critical for the  
570 annotation of human GWAS. Most identified GWAS signals are in the non-coding region of the

571 genome. Due to the linkage disequilibrium structure of the human genome, each GWAS locus  
572 contains a large number of variants, each passing genome-wide significance level <sup>55</sup>. Furthermore,  
573 as these signals are often non-coding, the target gene and the target cell type remain unknown.  
574 While molecular quantitative trait locus studies and bulk epigenome annotation experiments have  
575 been important to define the molecular pathways leading to disease development from the  
576 identified signals, these methods have limited resolution, as cell type-specific enhancer regions  
577 cannot be identified by bulk analysis <sup>56</sup>. Additionally, bulk molecular quantitative trait locus  
578 studies suffer from the same linkage disequilibrium problems as GWAS analyses <sup>57</sup>. Our results  
579 indicate that multiple GWAS regions are conserved between mice and humans. Single cell open  
580 chromatin information enables not only the identification of affected cell types, but also the  
581 understanding of co-regulation of the open chromatin area. It is also able to highlight critical target  
582 genes. Performing single cell open chromatin analysis on human kidney tissue samples will be  
583 essential to further understand molecular pathways altered by genetic variants. Here we showed  
584 three important examples. We confirmed the role of *Dab2* and its specific expression in the  
585 proximal tubule during kidney disease development, as its implication therein has been shown in  
586 previous expression quantitative trait locus and bulk epigenome analysis experiments <sup>51</sup>.  
587 Furthermore, we showed that the GWAS variants map only to those regions where chromatin is  
588 open exclusively in nephron progenitors, whereas chromatin becomes inaccessible as  
589 differentiation progresses during later stages, such as *Shroom3* and *Uncx*. This is an interesting  
590 and important novel mechanism, indicating that the altered expression of this gene might play a  
591 role in the development rewiring of the kidney. This mechanism is similar to genes associated with  
592 autism that are known to be expressed in the fetal but not in the adult stages <sup>58</sup> and highlights the  
593 critical role of understanding chromatin accessibility at multiple stages of differentiation.

594  
595 While we have generated a large amount of high-quality data, this information will need further  
596 experimental validation, which is beyond the scope of the current manuscript. In addition, one  
597 needs to be aware of the limitations when interpreting different computational analyses, for  
598 example, the motif enrichment analyses such as implemented by HOMER, SCENIC, and  
599 chromVAR, are not able to distinguish between TFs with similar binding sites. Future high-  
600 throughput studies that analyze open chromatin and gene expression information from the same

601 cells will be exceedingly helpful to correlate open chromatin and gene expression information  
602 along the differentiation trajectory <sup>24,59,60</sup>.

603

604 In summary, our dataset provides critical novel insight into the cell type-specific gene regulatory  
605 network, cell differentiation program, and disease development.

## 606 **Materials and Methods**

607

### 608 **Single cell RNA sequencing of P0 mice**

609 1-day-old mouse neonate was decapitated with surgical scissors, 2 kidneys were harvested and  
610 minced into 1 mm<sup>3</sup> pieces and incubated with digestion solution containing Enzyme D, Enzyme R  
611 and Enzyme A from Multi Tissue Dissociation Kit (Miltenyi, 130-110-201) at 37 °C for 15 min  
612 with agitation. Reaction was deactivated by adding 10% FBS, then solution was passed through a  
613 40 µm cell strainer. After centrifugation at 1,000 RPM for 5 min, cell pellet was incubated with  
614 500 µL of RBC lysis buffer on ice for 3 min. We centrifuged the cells at 1,000 RPM for 5 min at  
615 4 °C and resuspended the cells in the buffer for further steps. Cell number and viability were  
616 analyzed using Countess AutoCounter (Invitrogen, C10227). The cell concentration was 2.2  
617 million cells/mL with 92% viability. 10,000 cells were loaded into the Chromium Controller (10X  
618 Genomics, PN-120223) on a Chromium Single Cell B Chip (10X Genomics, PN-120262) and  
619 processed to generate single cell gel beads in the emulsion (GEM) according to the manufacturer's  
620 protocol (10X Genomics, CG000183). The library was generated using the Chromium Single Cell  
621 3' Reagent Kits v3 (10X Genomics, PN-1000092) and Chromium i7 Multiplex Kit (10X Genomics,  
622 PN-120262) according to the manufacturer's manual. Quality control for constructed library was  
623 performed by Agilent Bioanalyzer High Sensitivity DNA kit (Agilent Technologies, 5067-4626)  
624 for qualitative analysis. Quantification analysis was performed by Illumina Library Quantification  
625 Kit (KAPA Biosystems, KK4824). The library was sequenced on an Illumina HiSeq or NextSeq  
626 2x150 paired-end kits using the following read length: 28 bp Read1 for cell barcode and UMI, 8  
627 bp I7 index for sample index and 91 bp Read2 for transcript.

628

### 629 **Single cell ATAC sequencing**

630 3-week-old and 8-week-old mice were euthanized and perfused with chilled 1x PBS via left  
631 ventricle. Kidneys (0.25 g) were harvested, minced and lysed in 5 mL lysis buffer for 15 min. 1-  
632 day-old mice were decapitated with surgical scissors, and both kidneys were harvested. Kidneys  
633 were minced and lysed in 2 mL lysis buffer for 15 min. Tissue lysis reaction was then blocked by  
634 adding 10 mL 1x PBS into each tube, and solution was passed through a 40 µm cell strainer. Cell  
635 debris and cytoplasmic contaminants were removed by Nuclei PURE Prep Nuclei Isolation Kit  
636 (Sigma, NUC-201) after centrifugation at 13,000 RPM for 45 min. Nuclei concentration was

637 calculated with Countess AutoCounter (Invitrogen, C10227). Diluted nuclei suspension was  
638 loaded and incubated in transposition mix from Chromium Single Cell ATAC Library & Gel Bead  
639 Kit (10X Genomics, PN-1000110) by targeting 10,000 nuclei recovery. GEMs were then captured  
640 on the Chromium Chip E (10x Genomics, PN-1000082) in the Chromium Controller according to  
641 the manufacturer's protocol (10X Genomics, CG000168). Libraries were generated using the  
642 Chromium Single Cell ATAC Library & Gel Bead Kit and Chromium i7 Multiplex Kit N (10X  
643 Genomics, PN-1000084) according to the manufacturer's manual. Quality control for constructed  
644 library was performed by Agilent Bioanalyzer High Sensitivity DNA kit. The library was sequenced  
645 on an Illumina HiSeq 2x50 paired-end kits using the following read length: 50 bp Read1 for DNA  
646 fragments, 8 bp i7 index for sample index, 16 bp i5 index for cell barcodes and 50 bp Read2 for  
647 DNA fragments.

648

#### 649 **Bulk ATAC sequencing**

650 Bulk ATAC-seq was performed as described earlier <sup>61,62</sup>. Briefly, 50,000 nuclei/sample were  
651 tagged with Tn5 transposase (Illumina) in 50 µl reaction volume including Tween-20 (0.1%)  
652 (Sigma) and digitonin (0.01%) (Promega). The reaction was carried out at 37 °C for 30 min in a  
653 thermomixer at 1,000 RPM. After purification of DNA with Qiagen Minelute Reaction Cleanup  
654 kit (Qiagen), samples were subjected to library amplification (8-10 cycles). Libraries were purified  
655 with AmpureXP beads (Beckman Coulter) and their quality was assessed by Agilent High  
656 sensitivity DNA Bioanalysis chip (Agilent). Libraries were submitted to 150 bp PE sequencing.

657

#### 658 **snATAC-seq data analysis**

##### 659 *Data processing and quality control*

660 Raw fastq files were aligned to the mm10 (GRCm38) reference genome and quantified using Cell  
661 Ranger ATAC (v. 1.1.0). We only kept valid barcodes with number of fragments ranging from  
662 1,000 to 40,000 and mitochondria ratio less than 10%. One of the important indicators for ATAC-  
663 seq data quality is the fraction of peaks in promoter regions, so we did further filtration based on  
664 promoter ratio. We noticed the promoter ratio seemed to follow a binary distribution, with most of  
665 cells either having a promoter ratio around 5% (background) or more than 20% (valid cells)  
666 (**Figure S1d**). We therefore filtered out cells with a promoter ratio <20%. After this stringent  
667 quality control, we obtained 11,429 P0 single cells (5,993 in P0\_batch\_1 and 5,436 in P0\_batch\_2)

668 and 16,887 adult single cells (7,129 in P56\_batch\_3, 6,397 in P56\_batch\_4, and 3,361 in  
669 P21\_batch\_5).

670

### 671 *Preprocessing*

672 Since snATAC-seq data are very sparse, previous methods either conducted peak calling or  
673 binarization before clustering. Here, we chose to do binarization instead of peak calling for two  
674 reasons: 1) Peak calling is time consuming; 2) Many peaks are cell type-specific, open chromatin  
675 regions in rare populations are more likely to be treated as background. After binarizing fragments  
676 into 5 kb bins and removing the fragments not matched to chromosomes or aligned to the  
677 mitochondria, we binarized the cell-bin matrix. In order to only keep bins that were informative  
678 for clustering, we removed the top 5% most accessible bins and bins overlapping with ENCODE  
679 blacklist. The 484,606 remaining bins were used as input for clustering.

680

### 681 *Dimension reduction, batch effect correction and clustering*

682 Clustering was conducted using snapATAC<sup>16</sup>, a single-cell ATAC-seq algorithm scalable to large  
683 dataset. Previous benchmarking evaluation has shown that snapATAC was one of the best-  
684 performing methods for snATAC-seq clustering<sup>63</sup>. Diffusion map was applied as a dimension  
685 reduction method using function *runDiffusionMaps*. To remove batch effect, we used Harmony<sup>17</sup>,  
686 in which the low dimensional embeddings obtained from the diffusion map were used as input.  
687 Harmony iteratively pulled batch-specific centroid to cluster centroid until convergence to remove  
688 the variability across batches. After batch correction, a graph was constructed using k Nearest  
689 Neighbor (kNN) algorithm with k=15, which was then used as input for Louvain clustering. We  
690 used the first 20 dimensions for the Louvain algorithm. The number of dimensions was chosen  
691 using a method recommended by snapATAC, although we noticed that the clustering results were  
692 similar among a series of dimensions from 18 to 30.

693

### 694 *Cell type annotation*

695 We used a published list of marker genes<sup>9,19</sup> to annotate kidney cell types. In order to infer gene  
696 expression of each cell type, we built a cell-gene activity score matrix by integrating all fragments  
697 that overlapped with gene transcript. We used GENCODE Mouse release VM16<sup>22</sup> as reference  
698 annotation.



699

### 700 *Peak calling and visualization*

701 Peak calling was conducted for each cell type separately using MACS2 <sup>18</sup>. We aggregated all  
702 fragments obtained from the same cell types to build a pseudo-bulk ATAC data and conducted  
703 peak calling with parameters “--nomodel --keep-dup all --shift 100 --ext 200 --qval 1e-2 -B --  
704 SPMR --call-summits”. By specifying “--SPMR”, MACS2 generated “fragment pileup per million  
705 reads” pileup files, which were converted to bigwig format for visualization using UCSC  
706 bedGraphToBigWig tool.

707

708 We also visualized public chromatin ChIP-seq data and RNA-seq data obtained from ENCODE  
709 Encyclopedia (<https://www.encodeproject.org/>) with the following identifiers: ENCFF338WZP,  
710 ENCFF872MVE, ENCFF455HPY, ENCFF049LRQ, ENCFF179NTO, ENCFF071PID,  
711 ENCFF746MFH, ENCFF563LOO, ENCFF184AYF, ENCFF107NQP, ENCFF465THI,  
712 ENCFF769XWI, ENCFF591DAX. The Six2 ChIP-seq data were obtained from <sup>64</sup> and the WGBS  
713 data were obtained from <sup>65</sup>.

714

### 715 *Genomic elements stratification*

716 Mouse mm10 genome annotation files were download from UCSC Table Browser  
717 (<https://genome.ucsc.edu/cgi-bin/hgTables>) using GENCODE VM23. TSS upstream 5 kb regions  
718 were included as promoter regions, but the results were similar when using 2 kb upstream regions  
719 as promoters. We then studied the number of overlapped regions between open chromatin regions  
720 identified from the snATAC-seq and bulk ATAC-seq dataset and genome annotations. Since one  
721 open chromatin region could overlap with multiple genomic elements, we defined an order of  
722 genomic elements as exon > 5'-UTR > 3'-UTR > intron > promoter > distal elements. To be more  
723 specific, if one peak overlapped with both exon and 5'-UTR, the algorithm would count it as an  
724 exon-region peak.

725

### 726 *Identification of differentially accessible regions*

727 Peaks identified in each cell type were combined to build a union peak set. Overlapping peaks  
728 were then merged to one peak using *reduce* function from the GenomicRanges package. This  
729 resulted in 300,755 peaks, which were used to build binarized cell-by-peak matrix. Differentially

730 accessible peaks (DAPs) for each cell type were identified by pairwise peak comparison.  
731 Specifically, for each peak, we conducted a Fisher's exact test between a cell type and each of the  
732 other cell types. To address multiple testing problem, we used the Benjamini-Hochberg approach  
733 (BH correction) to correct p values. Peaks with corrected p values below significance level (0.05)  
734 in all pairwise tests were defined as DAPs. In total, we obtained 60,683 DAPs, which were used  
735 for motif enrichment analysis.

736

#### 737 *Motif enrichment analysis*

738 Motif enrichment analysis was conducted using DAPs by HOMER v4.10.4 <sup>27</sup> with parameters  
739 background="automatic" and scan.size=300. We noticed that *de novo* motif identification only  
740 generated few significant results, so we focused on known motifs for our following study. We used  
741 the significance level of 0.05 for BH corrected p value to determine the enriched results. The motif  
742 enrichment results are provided in **Supplemental Table 3**.

743

#### 744 *Peak-peak correlation analysis*

745 Peak-peak correlation analysis was conducted using Cicero <sup>26</sup>. In order to find developmental  
746 stage-specific peak-peak correlations, the analysis was conducted for P0 and adult separately.  
747 Cicero uses Graphic Lasso with distance penalty to assess the co-accessibility between different  
748 peaks. Cicero analysis was conducted using the *run\_cicero* function with default parameters. A  
749 heuristic cutoff of 0.25 score of co-accessibility was used to determine the connections between  
750 two peaks.

751

#### 752 *snATAC-seq trajectory analysis*

753 snATAC-seq trajectory was conducted using Cicero, which extended Monocle3 to the snATAC-  
754 seq analysis. We obtained the preprocessed P0 snATAC-seq cell-peak matrix from snapATAC as  
755 input for Cicero and conducted dimension reduction using Latent Semantic Indexing (LSI) and  
756 visualized using UMAP. Trajectory graph was built using the function *learn\_graph*. Batch effect  
757 was not observed between the two P0 batches, and the trajectory graph was consistent with cell  
758 type assignment with clustering analysis (**Figures S3 a-b**).

759

760 In order to study how open chromatin changes are associated with the cell fate decision, we first  
761 binned the cells into 15 groups based on their pseudotime and cell type assignment. Next, we  
762 studied the DAPs between each group and its ancestral group using the same methods described  
763 above. The number of newly open and closed chromatin were reported using pie charts. The exact  
764 peak locations are provided in the **Supplemental Table 7**.

765

#### 766 *Genes and gene ontology terms associated with snATAC-seq trajectory*

767 Based on the binned trajectory graphs and DAPs between each group and its ancestral group, we  
768 next used GREAT tool <sup>66</sup> to study the enrichment of associated genes and gene ontology (GO)  
769 terms along the trajectory. We used the newly open or closed peaks as test regions and all the peaks  
770 from peak-calling output as the background regions for the analysis. The output can be found in  
771 the **Supplemental Table 8 and 9**.

772

#### 773 *Predict cis-regulatory elements*

774 We implemented two methods to study cis-regulatory elements in the snATAC-seq data. The first  
775 method was inspired by <sup>23</sup>, which was based on the observation that there was co-enrichment in  
776 the genome between the snATAC-seq cell type-specific peaks and scRNA-seq cell type-specific  
777 genes. This method links a gene with a peak if 1) they were both specific in the same cell type, 2)  
778 they were in *cis*, meaning that the peak is in  $\pm 100$  kb region of the TSS of the corresponding gene,  
779 and 3) the peak did not directly overlap with the TSS of the gene. This method successfully inferred  
780 several known distal elements such as for *Six2* and *Slc6a18* (**Figure S2g**).

781

782 Alternatively, we assessed the co-accessibility of two peaks. We implemented Cicero <sup>26</sup>, which  
783 aggregates similar cells to obtain a set of “meta-cells” and address the issue with sparsity in the  
784 snATAC-seq data. We used *run\_cicero* function with default parameters to predict cis-regulatory  
785 elements (CREs). Although it is recommended to use 0.25 as a cutoff for co-accessibility score,  
786 we noticed that this resulted in a great amount of CREs, which could contain many false positives.  
787 Thus, we used a more stringent score of 0.4 for the cutoff and retained 1,214,638 and 926,288  
788 CRE links in the P0 and adult data, respectively.

789

## 790 **Bulk ATAC sequencing analysis**

791 Bulk ATAC-seq raw fastq files were processed using the end-to-end tool ENCODE ATAC-seq  
792 pipeline (**Software and Algorithms**). This tool provided a standard workflow for ATAC-seq data  
793 quality control, adaptor removal, alignment, and peak calling. To obtain high quality ATAC-seq  
794 peaks, peak calling results from two biological replicates were compared and only those peaks that  
795 were present in both replicates were kept, which were further used to compare with snATAC-seq  
796 peaks.

797

## 798 **Correlation of bulk and single nuclei ATAC sequencing data**

799 snATAC-seq reads were aggregated to a pseudo-bulk data for the comparison purpose. To prevent  
800 the effect of sex chromosome and mitochondria chromosome, reads from chromosome X, Y and  
801 M were excluded from our analysis. We used multiBigwigSummary tool from deeptools <sup>67</sup> to study  
802 the correlation between different samples. Specifically, the whole genome was binned into equally  
803 sized (10 kb) windows, and the reads in each bin were aggregated, generating a bin-read count  
804 vector for each of the sample. The correlation of these vectors was computed as a measure of  
805 pairwise similarity between samples.

806

807 To compare the number of peaks in these two datasets, we used as input the narrowpeak files from  
808 the snATAC-seq and bulk ATAC-seq analysis. We filtered out bulk ATAC-seq peaks with q value >  
809 0.01 to be consistent with the snATAC-seq setting. Since the snATAC peaks were called after  
810 merging different time points, we also took the union set of bulk ATAC-seq peaks from different  
811 time points. We then used *findoverlap* function in GenomicRanges package <sup>68</sup> to find and report  
812 overlapped peaks.

813

## 814 **Comparison between single nuclei ATAC sequencing data and single cell RNA sequencing** 815 **data**

816 In order to compare the cluster assignment between snATAC-seq data and scRNA-seq data, we  
817 obtained the average gene expression values and peak accessibility in each cluster for P0 and adult  
818 samples separately. We next transformed snATAC-seq data by summing up the reads within gene  
819 body and 2 kb upstream regions to build gene activity score matrix, as suggested in Seurat <sup>20</sup>. Then,  
820 we normalized the data and computed the mean expression and mean gene activity scores in each

821 cell type, and calculated z scores of each gene. Pearson's correlation coefficient was then  
822 calculated among top 3,000 highly variable genes between snATAC-seq data and scRNA-seq data.  
823 We found high concordance between these two datasets in terms of cell type assignment (**Figure**  
824 **S4**).

825

## 826 **Single cell RNA sequencing data analysis**

### 827 *Alignment and quality control*

828 Raw fastq files were aligned to the mm10 (Ensembl GRCm38.93) reference genome and  
829 quantified using Cell Ranger v3.1.0 (<http://10xgenomics.com>). Seurat R package v3.0<sup>69</sup> was used  
830 for data quality control, preprocessing and dimensional reduction analysis. After gene-cell data  
831 matrix generation of both P0 and adult datasets, matrices were merged and poor-quality cells with  
832 <200 or >3,000 expressed genes and mitochondrial gene percentages >50 were excluded, leaving  
833 25,138 P0 and 18,498 adult cells for further analytical processing, respectively (**Figures S1j-k**).

834

### 835 *Pre-processing, batch effect correction and dimension reduction*

836 Data were normalized by RPM following log transformation and 3,000 highly variable genes were  
837 selected for scaling and principal component analysis (PCA). Harmony R package v1.0<sup>17</sup> was  
838 used to correct batch effects. The top 20 dimensions of Harmony embeddings were used for  
839 downstream uniform manifold approximation and projection (UMAP) visualization and clustering  
840 (**Figures S1l-m**).

841

### 842 *Cell clustering, identification of marker genes and differentially expressed genes*

843 Louvain algorithm with resolution 0.4 was used to cluster cells, which resulted in 18 distinct cell  
844 clusters. A gene was considered to be differentially expressed if it was detected in at least 25% of  
845 one group and with at least 0.25 log fold change between two groups and the significant level of  
846 BH-adjusted p value <0.05 in Wilcoxon rank sum test was used. We used a list of marker genes  
847 9,19 to manually annotate cell types. 2 distal convoluted tubule clusters were merged based on the  
848 marker gene expression, resulting in a total of 17 clusters (**Figures S1i, n, o**).

849

850 *scRNA-seq trajectory analysis*

851 Monocle3

852 To construct single cell pseudotime trajectory and to identify genes whose expression changed as  
853 the cells underwent transition, Monocle3 v0.1.3 <sup>70</sup> was applied to P0 cells of the following Seurat  
854 cell clusters: nephron progenitors (NP), proliferating cells, stroma-like cells, podocytes, loop of  
855 Henle (LOH), early proximal tubule (PT), proximal tubule S1, proximal tubule S3 cells.

856

857 To show cell trajectories from both small (nephron progenitors) and large cell populations  
858 (proximal tubule), an equal number of 450 cells per cluster was randomly subsampled. Cells were  
859 re-clustered by Monocle3 using a resolution of 0.0005 with k-nearest neighbor (kNN) k=29.  
860 Highly variable genes along pseudotime were identified using differential *GeneTest* function and  
861 cells were ordered along pseudotime trajectory. NP cluster was defined as earliest principal node.  
862 In order to find genes differentially expressed along pseudotime, trajectories for podocytes, loop  
863 of Henle, and proximal tubule clusters were analyzed separately with the *fit\_models* function of  
864 Monocle3. Genes with a q value <0.05 in the differential *GeneTest* analysis were kept. In an  
865 alternate approach, *graph\_test* function of Monocle3 was used and trajectory-variable genes were  
866 collected into modules at a resolution of 0.01.

867

868 RNA velocity

869 To calculate RNA velocity, Python-based Velocityto command-line tool as well as Velocityto.R  
870 package were used as instructed <sup>30</sup>. We used Velocityto to calculate the single-cell  
871 trajectory/directionality using spliced and unspliced reads. From loom files produced by the  
872 command-line tool, we subset the exact same cells that were previously selected randomly for  
873 Monocle trajectory analysis. This subset was loaded into R using the SeuratWrappers v0.1.0  
874 package. RNA velocity was estimated using gene-relative model with k-nearest neighbor (kNN)  
875 cell pooling (k = 25). The parameter n was set at 200, when visualizing RNA velocity on the  
876 UMAP embedding.

877

878 *Gene regulatory network inference*

879 In order to identify TFs and characterize cell states, we employed *cis*-regulatory analysis using the  
880 R package SCENIC v1.1.2.2 <sup>71</sup>, which infers the gene regulatory network based on co-expression

881 and DNA motif analysis. The network activity is then analyzed in each cell to identify recurrent  
882 cellular states. In short, TFs were identified using GENIE3 and compiled into modules (regulons),  
883 which were subsequently subjected to *cis*-regulatory motif analysis using RcisTarget with two  
884 gene-motif rankings: 10 kb around the TSS and 500 bp upstream. Regulon activity in every cell  
885 was then scored using AUCell. Finally, binarized regulon activity was projected onto Monocle3-  
886 created UMAP trajectories.

887

### 888 *Ligand-receptor interactions*

889 To assess cellular crosstalk between different cell types, we used the CellPhoneDB repository to  
890 infer cell-cell communication networks from single cell transcriptome data <sup>40</sup>. We used the Python  
891 package CellPhoneDB v2.1.2 together with the database v2.0.0 to predict cell type-specific ligand-  
892 receptor complexes as per the authors' instructions. Only receptors and ligands expressed in more  
893 than 5% of the cells in the specific cluster were considered. 1,000 iterations were used for pairwise  
894 comparison between cell types and considered for further statistical analysis.

895

### 896 **Immunofluorescence staining**

897 Mouse kidneys were fixed with 4% paraformaldehyde overnight, rinsed in PBS, and dehydrated  
898 for paraffin embedding. Antigen retrieval was performed using Tris-EDTA buffer pH 9.0 with a  
899 pressure cooker (PickCell Laboratories, Agoura Hills, CA) and antibody staining performed as  
900 described <sup>72</sup>. Antibodies used were as follows: guinea pig FOXL1 (1:1,500) <sup>73</sup>, mouse E-cadherin  
901 (1:250; BD Transduction 610182, Franklin Lakes, NJ). Cy2-, Cy3-, and Cy5-conjugated donkey  
902 secondary antibodies were purchased from Jackson ImmunoResearch Laboratories, Inc.  
903 Fluorescence images were collected on a Keyence microscope.

904

### 905 **Material Table**

| REAGENT or RESOURCE                                              | SOURCE          | IDENTIFIER |
|------------------------------------------------------------------|-----------------|------------|
| <b>Chemicals, Antibodies, Peptides, and Recombinant Proteins</b> |                 |            |
| Guinea pig anti-Foxl1                                            | own production  | (ref. 73)  |
| Mouse anti-E-cadherin                                            | BD Transduction | Cat#610182 |

|                                                                                  |                                     |                                                                                                                                   |
|----------------------------------------------------------------------------------|-------------------------------------|-----------------------------------------------------------------------------------------------------------------------------------|
| Cy2-conjugated donkey secondary antibody                                         | Jackson ImmunoResearch Laboratories | Cat#715-225-150                                                                                                                   |
| Cy3-conjugated donkey secondary antibody                                         | Jackson ImmunoResearch Laboratories | Cat#715-165-150                                                                                                                   |
| Cy5-conjugated donkey secondary antibody                                         | Jackson ImmunoResearch Laboratories | Cat#715-175-150                                                                                                                   |
| DPBS                                                                             | Corning                             | Cat# 21-031-CV                                                                                                                    |
| Tet System Approved FBS                                                          | Clontech                            | Cat# 631106                                                                                                                       |
| Nonidet™ P40 Substitute                                                          | Sigma                               | Cat# 74385                                                                                                                        |
| Magnesium Chloride Solution                                                      | Sigma                               | Cat# M1028                                                                                                                        |
| Ultrapure BSA (50 mg/ml)                                                         | Thermo Fisher                       | Cat# AM2616                                                                                                                       |
| RNAse inhibitor                                                                  | Applied Biosystems                  | Cat# 100021540                                                                                                                    |
| <b>Critical Commercial Assays</b>                                                |                                     |                                                                                                                                   |
| Bioanalyzer High Sensitivity DNA kit                                             | Agilent Technologies                | 5067-4626                                                                                                                         |
| Chromium Cell B Chip                                                             | 10X Genomics                        | PN-120262                                                                                                                         |
| Chromium Chip E                                                                  | 10X Genomics                        | PN-1000082                                                                                                                        |
| Chromium Controller                                                              | 10X Genomics                        | PN-120223                                                                                                                         |
| Chromium i7 Multiplex Kit                                                        | 10X Genomics                        | PN-120262                                                                                                                         |
| Chromium Single Cell 3' Reagent Kits v3                                          | 10X Genomics                        | PN-1000092                                                                                                                        |
| Chromium Single Cell ATAC Library & Gel Bead Kit                                 | 10X Genomics                        | PN-1000110                                                                                                                        |
| Chromium Single Cell ATAC Library & Gel Bead Kit and Chromium i7 Multiplex Kit N | 10X Genomics                        | PN-1000084                                                                                                                        |
| Countess AutoCounter                                                             | Invitrogen                          | C10227                                                                                                                            |
| Illumina Library Quantification Kit                                              | KAPA Biosystems                     | KK4824                                                                                                                            |
| Multi Tissue dissociation kit                                                    | Miltenyi                            | 130-110-201                                                                                                                       |
| Nuclei PURE Prep Nuclei Isolation Kit                                            | Sigma                               | NUC-201                                                                                                                           |
| <b>Deposited Data</b>                                                            |                                     |                                                                                                                                   |
| sci-CAR seq data                                                                 | (ref. 24)                           | GSE117089                                                                                                                         |
| Mouse adult kidney WGBS data                                                     | (ref. 65)                           | GSM1051156                                                                                                                        |
| Mouse kidney H3K27ac and H3K4me1 CHIP-seq, WGBS, and RNA-seq                     | ENCODE project                      | ENCFF338WZP, ENCFF872MVE, ENCFF455HPY, ENCFF049LRQ, ENCFF179NTO, ENCFF071PID, ENCFF746MFH, ENCFF563LOO, ENCFF184AYF, ENCFF107NQP, |



|                                                |              |                                                                                                                                                                                           |
|------------------------------------------------|--------------|-------------------------------------------------------------------------------------------------------------------------------------------------------------------------------------------|
|                                                |              | ENCF465THI, ENCF769XWI, ENCF591DAX                                                                                                                                                        |
| Six2 ChIP-seq data in nephron progenitor cells | (ref. 64)    | GUDMAP database (RID:Q-Y4CY)                                                                                                                                                              |
| <b>Software and Algorithms</b>                 |              |                                                                                                                                                                                           |
| bedtools v. 2.29.2                             | open source  | <a href="https://bedtools.readthedocs.io/en/latest/">https://bedtools.readthedocs.io/en/latest/</a>                                                                                       |
| Cell Ranger ATAC v. 1.1.0                      | 10X Genomics | <a href="https://support.10xgenomics.com/single-cell-atac/software/downloads/latest">https://support.10xgenomics.com/single-cell-atac/software/downloads/latest</a>                       |
| Cell Ranger v. 3.1.0                           | 10X Genomics | <a href="https://support.10xgenomics.com/single-cell-gene-expression/software/downloads/latest">https://support.10xgenomics.com/single-cell-gene-expression/software/downloads/latest</a> |
| CellPhoneDB v. 2.1.2                           | open source  | <a href="https://www.cellphonedb.org">https://www.cellphonedb.org</a>                                                                                                                     |
| ChromVAR v. 3.1.0                              | open source  | <a href="http://bioconductor.org/packages/release/bioc/html/chromVAR.html">http://bioconductor.org/packages/release/bioc/html/chromVAR.html</a>                                           |
| Cicero v. 1.5.5                                | open source  | <a href="https://github.com/cole-trapnell-lab/cicero-release">https://github.com/cole-trapnell-lab/cicero-release</a>                                                                     |
| deeptools v. 2.0                               | open source  | <a href="https://deeptools.readthedocs.io/en/develop/">https://deeptools.readthedocs.io/en/develop/</a>                                                                                   |
| ENCODE ATAC-seq pipeline                       | open source  | <a href="https://github.com/kundajelab/atac_dnase_pipelines">https://github.com/kundajelab/atac_dnase_pipelines</a>                                                                       |
| HOMER v. 4.10.4                                | open source  | <a href="http://homer.ucsd.edu/homer/motif/">http://homer.ucsd.edu/homer/motif/</a>                                                                                                       |
| IGV                                            | open source  | <a href="http://software.broadinstitute.org/software/igv/">http://software.broadinstitute.org/software/igv/</a>                                                                           |
| MACS2 v. 2.2.6                                 | open source  | <a href="https://github.com/taoliu/MACS">https://github.com/taoliu/MACS</a>                                                                                                               |
| Monocle3 v. 0.1.3                              | open source  | <a href="http://cole-trapnell-lab.github.io/monocle-release/">http://cole-trapnell-lab.github.io/monocle-release/</a>                                                                     |
| Harmony                                        | open source  | <a href="https://github.com/immunogenomics/harmony">https://github.com/immunogenomics/harmony</a>                                                                                         |
| SCENIC v. 1.1.2.2                              | open source  | <a href="https://aertslab.org/#scenic">https://aertslab.org/#scenic</a>                                                                                                                   |
| Seurat R package v. 3.0                        | open source  | <a href="https://satijalab.org/seurat/">https://satijalab.org/seurat/</a>                                                                                                                 |
| snapATAC                                       | open source  | <a href="https://github.com/r3fang/SnapATAC">https://github.com/r3fang/SnapATAC</a>                                                                                                       |
| UCSC bedgraphtobigwig                          | open source  | <a href="http://hgdownload.soe.ucsc.edu/admin/exe/linux.x86_64.v385/">http://hgdownload.soe.ucsc.edu/admin/exe/linux.x86_64.v385/</a>                                                     |
| UCSC liftOver                                  | open source  | <a href="https://genome.ucsc.edu/cgi-bin/hgLiftOver">https://genome.ucsc.edu/cgi-bin/hgLiftOver</a>                                                                                       |
| VelocityR                                      | open source  | <a href="https://github.com/velocity-team/velocity.R">https://github.com/velocity-team/velocity.R</a>                                                                                     |
| VisCello                                       | open source  | <a href="https://github.com/qinzhu/VisCello">https://github.com/qinzhu/VisCello</a>                                                                                                       |

906 **Acknowledgements**

907 Work in the Susztak lab is supported by the NIH DK076077, DK087635, and DK105821. MSB is  
908 supported by a German Research Foundation grant (BA 6205/2-1).

909

910

911 **Author Contributions**

912 KS and ZM designed and conceived the experiment. ZYM, JW, RS, and TA conducted the  
913 experiment. ZM conducted snATAC-seq bioinformatics analysis with advice from KS, HL, ML,  
914 and JK. MSB and ZM conducted scRNA-seq bioinformatics analysis with advice from KS. AMK  
915 and AYK conducted immunofluorescence staining with supervision from KHK. KS, ZM, and  
916 MSB wrote the manuscript and all authors edited and approved of the final manuscript.

917

918

919 **Conflict of Interest**

920 Authors declare no competing interests.

921

922

923 **Lead Contact and Materials Availability**

924 Raw data files and data matrix are being uploaded onto GEO and an accession number will be  
925 provided when it becomes available. The annotated and analyzed data can be viewed at  
926 [http://susztaklab.com/VisCello\\_snATAC/](http://susztaklab.com/VisCello_snATAC/) and <http://susztaklab.com/igy/>. Further information  
927 and requests for resources and reagents should be directed to and will be fulfilled by the lead  
928 contact: Katalin Susztak. Email: [ksusztak@pennterms.edu](mailto:ksusztak@pennterms.edu).

929 **References**

930

- 931 1 Reidy, K., Kang, H. M., Hostetter, T. & Susztak, K. Molecular mechanisms of diabetic  
932 kidney disease. *J Clin Invest* **124**, 2333-2340, doi:10.1172/JCI72271 (2014).
- 933 2 Costantini, F. & Kopan, R. Patterning a complex organ: branching morphogenesis and  
934 nephron segmentation in kidney development. *Dev Cell* **18**, 698-712,  
935 doi:10.1016/j.devcel.2010.04.008 (2010).
- 936 3 Park, J. S. *et al.* Six2 and Wnt regulate self-renewal and commitment of nephron  
937 progenitors through shared gene regulatory networks. *Dev Cell* **23**, 637-651,  
938 doi:10.1016/j.devcel.2012.07.008 (2012).
- 939 4 Harding, S. D. *et al.* The GUDMAP database--an online resource for genitourinary  
940 research. *Development (Cambridge, England)* **138**, 2845-2853, doi:10.1242/dev.063594  
941 (2011).
- 942 5 Wu, H. *et al.* Comparative Analysis and Refinement of Human PSC-Derived Kidney  
943 Organoid Differentiation with Single-Cell Transcriptomics. *Cell Stem Cell* **23**, 869-881  
944 e868, doi:10.1016/j.stem.2018.10.010 (2018).
- 945 6 Takasato, M. *et al.* Kidney organoids from human iPS cells contain multiple lineages and  
946 model human nephrogenesis. *Nature* **526**, 564-568, doi:10.1038/nature15695 (2015).
- 947 7 Morizane, R. & Bonventre, J. V. Generation of nephron progenitor cells and kidney  
948 organoids from human pluripotent stem cells. *Nat Protoc* **12**, 195-207,  
949 doi:10.1038/nprot.2016.170 (2017).
- 950 8 Nishinakamura, R. Human kidney organoids: progress and remaining challenges. *Nature*  
951 *Reviews Nephrology* **15**, 613-624, doi:10.1038/s41581-019-0176-x (2019).
- 952 9 Combes, A. N. *et al.* Correction: Single cell analysis of the developing mouse kidney  
953 provides deeper insight into marker gene expression and ligand-receptor crosstalk  
954 (doi:10.1242/dev.178673). *Development* **146**, doi:10.1242/dev.182162 (2019).
- 955 10 Adam, M., Potter, A. S. & Potter, S. S. Psychrophilic proteases dramatically reduce  
956 single-cell RNA-seq artifacts: a molecular atlas of kidney development. *Development*  
957 **144**, 3625-3632, doi:10.1242/dev.151142 (2017).
- 958 11 Schmidt-Ott, K. M. How to grow a kidney: patient-specific kidney organoids come of  
959 age. *Nephrol Dial Transplant* **32**, 17-23, doi:10.1093/ndt/gfw256 (2017).
- 960 12 Menon, R. *et al.* Single-cell analysis of progenitor cell dynamics and lineage  
961 specification in the human fetal kidney. *Development (Cambridge, England)* **145**,  
962 doi:10.1242/dev.164038 (2018).

- 963 13 Lindstrom, N. O. *et al.* Progressive Recruitment of Mesenchymal Progenitors Reveals a  
964 Time-Dependent Process of Cell Fate Acquisition in Mouse and Human Nephrogenesis.  
965 *Dev Cell* **45**, 651-660 e654, doi:10.1016/j.devcel.2018.05.010 (2018).
- 966 14 Hochane, M. *et al.* Single-cell transcriptomics reveals gene expression dynamics of  
967 human fetal kidney development. *PLOS Biology* **17**, e3000152,  
968 doi:10.1371/journal.pbio.3000152 (2019).
- 969 15 Park, J., Liu, C. L., Kim, J. & Susztak, K. Understanding the kidney one cell at a time.  
970 *Kidney Int* **96**, 862-870, doi:10.1016/j.kint.2019.03.035 (2019).
- 971 16 Fang, R. *et al.* Fast and Accurate Clustering of Single Cell Epigenomes Reveals  
972 *Cis*-Regulatory Elements in Rare Cell Types. *bioRxiv*, 615179,  
973 doi:10.1101/615179 (2019).
- 974 17 Korsunsky, I. *et al.* Fast, sensitive and accurate integration of single-cell data with  
975 Harmony. *Nat Methods* **16**, 1289-1296, doi:10.1038/s41592-019-0619-0 (2019).
- 976 18 Zhang, Y. *et al.* Model-based analysis of ChIP-Seq (MACS). *Genome Biol* **9**, R137,  
977 doi:10.1186/gb-2008-9-9-r137 (2008).
- 978 19 Park, J. *et al.* Single-cell transcriptomics of the mouse kidney reveals potential cellular  
979 targets of kidney disease. *Science* **360**, 758-763, doi:10.1126/science.aar2131 (2018).
- 980 20 Stuart, T. *et al.* Comprehensive Integration of Single-Cell Data. *Cell* **177**, 1888-  
981 1902.e1821, doi:10.1016/j.cell.2019.05.031 (2019).
- 982 21 Wu, H., Kirita, Y., Donnelly, E. L. & Humphreys, B. D. Advantages of Single-Nucleus  
983 over Single-Cell RNA Sequencing of Adult Kidney: Rare Cell Types and Novel Cell  
984 States Revealed in Fibrosis. *J Am Soc Nephrol* **30**, 23-32, doi:10.1681/ASN.2018090912  
985 (2019).
- 986 22 Frankish, A. *et al.* GENCODE reference annotation for the human and mouse genomes.  
987 *Nucleic Acids Res* **47**, D766-D773, doi:10.1093/nar/gky955 (2019).
- 988 23 Zhu, Q. *et al.*, doi:10.1101/848846 (2019).
- 989 24 Cao, J. *et al.* Joint profiling of chromatin accessibility and gene expression in thousands  
990 of single cells. *Science* **361**, 1380-1385, doi:10.1126/science.aau0730 (2018).
- 991 25 O'Brien, L. L. *et al.* Transcriptional regulatory control of mammalian nephron  
992 progenitors revealed by multi-factor cis-tromic analysis and genetic studies. *PLoS Genet*  
993 **14**, e1007181, doi:10.1371/journal.pgen.1007181 (2018).
- 994 26 Pliner, H. A. *et al.* Cicero Predicts cis-Regulatory DNA Interactions from Single-Cell  
995 Chromatin Accessibility Data. *Mol Cell* **71**, 858-871 e858,  
996 doi:10.1016/j.molcel.2018.06.044 (2018).

- 997 27 Heinz, S. *et al.* Simple combinations of lineage-determining transcription factors prime  
998 cis-regulatory elements required for macrophage and B cell identities. *Mol Cell* **38**, 576-  
999 589, doi:10.1016/j.molcel.2010.05.004 (2010).
- 1000 28 Aibar, S. *et al.* SCENIC: single-cell regulatory network inference and clustering. *Nature*  
1001 *Methods* **14**, 1083-1086, doi:10.1038/nmeth.4463 (2017).
- 1002 29 Nittoli, V. *et al.* Characterization of paralogous uncx transcription factor encoding genes  
1003 in zebrafish. *Gene X* **2**, 100011, doi:10.1016/j.gene.2019.100011 (2019).
- 1004 30 La Manno, G. *et al.* RNA velocity of single cells. *Nature* **560**, 494-498,  
1005 doi:10.1038/s41586-018-0414-6 (2018).
- 1006 31 Schep, A. N., Wu, B., Buenrostro, J. D. & Greenleaf, W. J. chromVAR: inferring  
1007 transcription-factor-associated accessibility from single-cell epigenomic data. *Nat*  
1008 *Methods* **14**, 975-978, doi:10.1038/nmeth.4401 (2017).
- 1009 32 Guo, J. K. *et al.* WT1 is a key regulator of podocyte function: reduced expression levels  
1010 cause crescentic glomerulonephritis and mesangial sclerosis. *Hum Mol Genet* **11**, 651-  
1011 659, doi:10.1093/hmg/11.6.651 (2002).
- 1012 33 Kann, M. *et al.* WT1 targets Gas1 to maintain nephron progenitor cells by modulating  
1013 FGF signals. *Development* **142**, 1254-1266, doi:10.1242/dev.119735 (2015).
- 1014 34 Nakai, S. *et al.* Crucial roles of Brn1 in distal tubule formation and function in mouse  
1015 kidney. *Development* **130**, 4751-4759, doi:10.1242/dev.00666 (2003).
- 1016 35 Nilsson, D., Heglind, M., Arani, Z. & Enerbäck, S. Foxc2 is essential for podocyte  
1017 function. *Physiol Rep* **7**, e14083-e14083, doi:10.14814/phy2.14083 (2019).
- 1018 36 Takahashi, T. *et al.* Temporally compartmentalized expression of ephrin-B2 during renal  
1019 glomerular development. *J Am Soc Nephrol* **12**, 2673-2682 (2001).
- 1020 37 Cheng, H. T. & Kopan, R. The role of Notch signaling in specification of podocyte and  
1021 proximal tubules within the developing mouse kidney. *Kidney Int* **68**, 1951-1952,  
1022 doi:10.1111/j.1523-1755.2005.00627.x (2005).
- 1023 38 Kang, H. M. *et al.* Defective fatty acid oxidation in renal tubular epithelial cells has a key  
1024 role in kidney fibrosis development. *Nat Med* **21**, 37-46, doi:10.1038/nm.3762 (2015).
- 1025 39 Das, A. *et al.* Stromal–epithelial crosstalk regulates kidney progenitor cell differentiation.  
1026 *Nature Cell Biology* **15**, 1035-1044, doi:10.1038/ncb2828 (2013).
- 1027 40 Vento-Tormo, R. *et al.* Single-cell reconstruction of the early maternal-fetal interface in  
1028 humans. *Nature* **563**, 347-353, doi:10.1038/s41586-018-0698-6 (2018).

- 1029 41 Trueb, B., Amann, R. & Gerber, S. D. Role of FGFR1 and other FGF signaling proteins  
1030 in early kidney development. *Cell Mol Life Sci* **70**, 2505-2518, doi:10.1007/s00018-012-  
1031 1189-9 (2013).
- 1032 42 Costantini, F. & Shakya, R. GDNF/Ret signaling and the development of the kidney.  
1033 *Bioessays* **28**, 117-127, doi:10.1002/bies.20357 (2006).
- 1034 43 Fan, X. *et al.* SLIT2/ROBO2 signaling pathway inhibits nonmuscle myosin IIA activity  
1035 and destabilizes kidney podocyte adhesion. *JCI Insight* **1**, e86934,  
1036 doi:10.1172/jci.insight.86934 (2016).
- 1037 44 Sajithlal, G., Zou, D., Silviu, D. & Xu, P. X. Eya 1 acts as a critical regulator for  
1038 specifying the metanephric mesenchyme. *Dev Biol* **284**, 323-336,  
1039 doi:10.1016/j.ydbio.2005.05.029 (2005).
- 1040 45 Hwang, D. Y. *et al.* Mutations of the SLIT2-ROBO2 pathway genes SLIT2 and SRGAP1  
1041 confer risk for congenital anomalies of the kidney and urinary tract. *Hum Genet* **134**, 905-  
1042 916, doi:10.1007/s00439-015-1570-5 (2015).
- 1043 46 Wuttke, M. *et al.* A catalog of genetic loci associated with kidney function from analyses  
1044 of a million individuals. *Nat Genet* **51**, 957-972, doi:10.1038/s41588-019-0407-x (2019).
- 1045 47 Hellwege, J. N. *et al.* Mapping eGFR loci to the renal transcriptome and phenome in the  
1046 VA Million Veteran Program. *Nat Commun* **10**, 3842, doi:10.1038/s41467-019-11704-w  
1047 (2019).
- 1048 48 Pattaro, C. *et al.* Genetic associations at 53 loci highlight cell types and biological  
1049 pathways relevant for kidney function. *Nature communications* **7**, 10023,  
1050 doi:10.1038/ncomms10023 (2016).
- 1051 49 Menon, M. C. *et al.* Intronic locus determines SHROOM3 expression and potentiates  
1052 renal allograft fibrosis. *J Clin Invest* **125**, 208-221, doi:10.1172/JCI76902 (2015).
- 1053 50 Khalili, H. *et al.* Developmental Origins for Kidney Disease Due to Shroom3 Deficiency.  
1054 *J Am Soc Nephrol* **27**, 2965-2973, doi:10.1681/ASN.2015060621 (2016).
- 1055 51 Qiu, C. *et al.* Renal compartment-specific genetic variation analyses identify new  
1056 pathways in chronic kidney disease. *Nat Med* **24**, 1721-1731, doi:10.1038/s41591-018-  
1057 0194-4 (2018).
- 1058 52 Kobayashi, A. *et al.* Six2 defines and regulates a multipotent self-renewing nephron  
1059 progenitor population throughout mammalian kidney development. *Cell Stem Cell* **3**,  
1060 169-181, doi:10.1016/j.stem.2008.05.020 (2008).
- 1061 53 Subramanian, A. *et al.* Single cell census of human kidney organoids shows  
1062 reproducibility and diminished off-target cells after transplantation. *Nat Commun* **10**,  
1063 5462, doi:10.1038/s41467-019-13382-0 (2019).

- 1064 54 Han, S. H. *et al.* PGC-1alpha Protects from Notch-Induced Kidney Fibrosis  
1065 Development. *J Am Soc Nephrol* **28**, 3312-3322, doi:10.1681/ASN.2017020130 (2017).
- 1066 55 Schaid, D. J., Chen, W. & Larson, N. B. From genome-wide associations to candidate  
1067 causal variants by statistical fine-mapping. *Nat Rev Genet* **19**, 491-504,  
1068 doi:10.1038/s41576-018-0016-z (2018).
- 1069 56 Cusanovich, D. A. *et al.* The cis-regulatory dynamics of embryonic development at  
1070 single-cell resolution. *Nature* **555**, 538-542, doi:10.1038/nature25981 (2018).
- 1071 57 Calderon, D. *et al.* Inferring Relevant Cell Types for Complex Traits by Using Single-  
1072 Cell Gene Expression. *Am J Hum Genet* **101**, 686-699, doi:10.1016/j.ajhg.2017.09.009  
1073 (2017).
- 1074 58 Parikshak, N. N. *et al.* Integrative functional genomic analyses implicate specific  
1075 molecular pathways and circuits in autism. *Cell* **155**, 1008-1021,  
1076 doi:10.1016/j.cell.2013.10.031 (2013).
- 1077 59 Zhu, C. *et al.* An ultra high-throughput method for single-cell joint analysis of open  
1078 chromatin and transcriptome. *Nature Structural & Molecular Biology* **26**, 1063-1070,  
1079 doi:10.1038/s41594-019-0323-x (2019).
- 1080 60 Chen, S., Lake, B. B. & Zhang, K. High-throughput sequencing of the transcriptome and  
1081 chromatin accessibility in the same cell. *Nature Biotechnology* **37**, 1452-1457,  
1082 doi:10.1038/s41587-019-0290-0 (2019).
- 1083 61 Buenrostro, J. D., Wu, B., Chang, H. Y. & Greenleaf, W. J. ATAC-seq: A Method for  
1084 Assaying Chromatin Accessibility Genome-Wide. *Curr Protoc Mol Biol* **109**, 21 29 21-  
1085 21 29 29, doi:10.1002/0471142727.mb2129s109 (2015).
- 1086 62 Corces, M. R. *et al.* An improved ATAC-seq protocol reduces background and enables  
1087 interrogation of frozen tissues. *Nat Methods* **14**, 959-962, doi:10.1038/nmeth.4396  
1088 (2017).
- 1089 63 Chen, H. *et al.* Assessment of computational methods for the analysis of single-cell  
1090 ATAC-seq data. *Genome Biol* **20**, 241, doi:10.1186/s13059-019-1854-5 (2019).
- 1091 64 O'Brien, L. L. *et al.* Differential regulation of mouse and human nephron progenitors by  
1092 the Six family of transcriptional regulators. *Development* **143**, 595-608,  
1093 doi:10.1242/dev.127175 (2016).
- 1094 65 Hon, G. C. *et al.* Epigenetic memory at embryonic enhancers identified in DNA  
1095 methylation maps from adult mouse tissues. *Nature Genetics* **45**, 1198-1206,  
1096 doi:10.1038/ng.2746 (2013).
- 1097 66 McLean, C. Y. *et al.* GREAT improves functional interpretation of cis-regulatory  
1098 regions. *Nat Biotechnol* **28**, 495-501, doi:10.1038/nbt.1630 (2010).

- 1099 67 Ramirez, F. *et al.* deepTools2: a next generation web server for deep-sequencing data  
1100 analysis. *Nucleic Acids Res* **44**, W160-165, doi:10.1093/nar/gkw257 (2016).
- 1101 68 Lawrence, M. *et al.* Software for Computing and Annotating Genomic Ranges. *PLOS*  
1102 *Computational Biology* **9**, e1003118, doi:10.1371/journal.pcbi.1003118 (2013).
- 1103 69 Stuart, T. *et al.* Comprehensive Integration of Single-Cell Data. *Cell* **177**, 1888-1902  
1104 e1821, doi:10.1016/j.cell.2019.05.031 (2019).
- 1105 70 Cao, J. *et al.* The single-cell transcriptional landscape of mammalian organogenesis.  
1106 *Nature* **566**, 496-502, doi:10.1038/s41586-019-0969-x (2019).
- 1107 71 Aibar, S. *et al.* SCENIC: single-cell regulatory network inference and clustering. *Nat*  
1108 *Methods* **14**, 1083-1086, doi:10.1038/nmeth.4463 (2017).
- 1109 72 Zhao, J., Hu, Z. Z., Zheng, X. G. & Ng, S. W. [2-(Tetra-zol-1-yl)acetato-kappaO]tris-(tri-  
1110 phenyl-phosphine-kappaP)silver(I) mono-hydrate. *Acta Crystallogr Sect E Struct Rep*  
1111 *Online* **65**, m1601, doi:10.1107/S1600536809048144 (2009).
- 1112 73 Aoki, R. *et al.* Foxl1-expressing mesenchymal cells constitute the intestinal stem cell  
1113 niche. *Cell Mol Gastroenterol Hepatol* **2**, 175-188, doi:10.1016/j.jcmgh.2015.12.004  
1114 (2016).
- 1115 74 Uhlen, M. *et al.* Proteomics. Tissue-based map of the human proteome. *Science* **347**,  
1116 1260419, doi:10.1126/science.1260419 (2015).  
1117



1118 **Figure Legends**

1119

1120 **Figure 1. snATAC-seq and scRNA-seq identified major cell types in developing and adult**  
1121 **mouse kidney.**

1122 (A) Schematics of the study design. Kidneys from P0 and adult mice were processed for snATAC-  
1123 seq and scRNA-seq followed by data processing and analysis including cell type identification and  
1124 peak calling.

1125 (B) UMAP embeddings of snATAC-seq data and scRNA-seq data. Using marker genes, cells were  
1126 annotated into nephron progenitors (NP), collecting duct intercalated cells (IC), collecting duct  
1127 principal cells (PC), proximal tubule segment 1 and 3 (PT S1 and PT S3), loop of Henle (LOH),  
1128 distal convoluted tubules (DCT), stromal cells (Stroma), podocytes (Podo), endothelial cells (Endo)  
1129 and immune cells (Immune). In scRNA-seq data, the same cell types were identified, with an  
1130 additional proliferative population and immune cells were clustered into neutrophils and  
1131 macrophages.

1132 (C) UMAP embeddings of snATAC-seq and scRNA-seq data colored by P0 and adult batches.

1133 (D) Genome browser view of read density in each snATAC-seq cluster at cell type marker gene  
1134 transcription start sites. We used *Uncx* for nephron progenitors, *Nphs2* for podocytes, *Akr1c21* for  
1135 proximal tubules, *Slc12a1* for loop of Henle, *Slc12a3* for distal convoluted tubule, *Trpv5* for  
1136 connecting tubule, *Aqp2* for collecting duct principal cells, *Atp6v1g3* for intercalated cells, *Egfl7*  
1137 for endothelial cells, *Clqb* for immune cells and *Col3a1* for stroma. Additional marker gene  
1138 examples are shown in **Figure S1h**.

1139 (E) Comparison of peaks identified from snATAC-seq data and bulk ATAC-seq data. Peaks that  
1140 are identified in both datasets are colored blue, and peaks that are dataset-specific are grey.

1141 (F) Violin plots showing cell type-specific gene expression in scRNA-seq data. With the exception  
1142 of proximal tubule, the same marker genes as in snATAC-seq data were used (*Slc5a2* and *Slc22a30*  
1143 for proximal tubule S1 and S3, respectively).

1144 (G) Correlation between snATAC-seq gene activity scores and gene expression values in P0 data.  
1145 The correlation of the adult dataset is shown in **Figure S1p**.

1146

1147 **Figure 2. Cell type-specific gene regulatory landscape of the mouse kidney.**

1148 (A) Left panel: Heatmap showing examples of the cell type-specific differentially accessible peaks  
1149 (DAPs) (yellow: open chromatin, blue: closed chromatin) (full results are shown in **Supplemental**  
1150 **Table 2**). Middle panel: Examples of cell type-specific motif enrichment analysis using Homer.  
1151 (full results are shown in **Supplemental Table 3**). Right panel: TF expression z score heatmap  
1152 that corresponds to the motif enrichment in each cell type.

1153 (B) Regulon activity heatmap. Each column represents a single cell, colored by cluster assignment  
1154 and ordered by hierarchical clustering; each row represents binarized regulon activities (“on-  
1155 black”, “off-white”) and ordered by hierarchical clustering.

1156 (C) UMAP depiction of regulon activity (“on-blue”, “off-grey”) and TF gene expression (red scale)  
1157 of exemplary regulons for proximal tubule (*Hnf1a*), nephron progenitors (*Uncx*), loop of Henle  
1158 (*Ppargc1a*), proliferating cells (*Hmgb3*) and podocytes (*Mafb*). Examples of target gene  
1159 expression of the *Uncx* regulon (*Eye1*, *Hoxc8*, *Pax2*, *Spock2* and *Wnt4*) are shown in purple scale.  
1160 Expression of target genes of *Hnf1a*, *Ppargc1a*, *Hmgb3* and *Mafb* is shown in **Figure S3d**.

1161 (D) tSNE representation of regulon density as a surrogate for stability of regulon states, as inferred  
1162 by SCENIC algorithm.

1163

1164 **Figure 3. The cellular trajectory of nephron progenitor differentiation.**

1165 (A) UMAP representation of snATAC-seq nephron progenitor differentiation trajectory towards  
1166 podocytes, proximal tubule, loop of Henle and distal convoluted tubule, respectively, as inferred  
1167 by Cicero. Cells are colored by pseudotime.

1168 (B) UMAP representation of scRNA-seq nephron progenitor differentiation trajectory towards  
1169 podocytes, proximal tubule and loop of Henle, respectively, as inferred by Monocle3. Cells are  
1170 colored by pseudotime.

1171 (C) Pseudotime-dependent chromatin accessibility and gene expression changes along the  
1172 proximal tubule (red), podocyte (green) and loop of Henle (blue) cell lineages. The first column  
1173 shows the dynamics of chromVAR TF enrichment score, the second column shows the dynamics  
1174 of TF gene expression values and the third and fourth column represent the dynamics of SCENIC-  
1175 reported target gene expression values of corresponding TFs, respectively. Additional examples  
1176 are given in **Figure S3e**.

1177

1178 **Figure 4. Chromatin dynamics of nephron progenitor differentiation.**

1179 Di-graph representing cell type and lineage divergence, as derived from Cicero trajectory inference.  
1180 Nephron progenitors (NP), podocytes (Podo), intermediate stage (IM), proximal tubule (PT), loop  
1181 of Henle (LOH) and distal convoluted tubule (DCT) are connected with their developmental  
1182 precursor stages and represented by ascending numbering. Arrows represent cell differentiation  
1183 along respective trajectories. Genes listed next to the trajectories were derived from analyzing gene  
1184 enrichment of differentially assessable peaks (DAPs) between two stages. Genes colored red were  
1185 derived from the opening DAPs between two stages, genes colored blue were derived from the  
1186 closing DAPs between two stages, and genes colored green were derived from opening DAPs  
1187 between two branches. Three important genes, *Foxl1*, *Hnf4a* and *Tfap2b* are shown along with  
1188 their cell type-specific accessibility peaks and immunostaining results. Peaks that were open  
1189 during the development of specific cell types are shown in red boxes. Immunofluorescence  
1190 staining of fetal mouse kidney shows FOXL1 in red along cellular differentiation (from right to  
1191 left) from early progenitor stage (asterisk) over comma-shaped (+) and S shaped bodies (cross)  
1192 towards podocytes within primitive glomeruli (#). HNF4A and TFAP2B in human adult kidney  
1193 samples (taken from the Human Protein Atlas, <http://www.proteinatlas.org> 74) are visualized by  
1194 immunohistochemistry in brown.

1195

1196 **Figure 5. Cell-cell communication analysis in the developing and adult mice highlighted the**  
1197 **critical role of stroma in driving cell differentiation.**

1198 (A) Heatmaps showing the number of cell-cell interactions in the scRNA-seq dataset of P0 (top)  
1199 and adult (bottom) kidneys, as inferred by CellPhoneDB. Dark blue and dark red colors denote  
1200 low and high numbers of cell-cell interactions, respectively.

1201 (B) CellPhoneDB-derived measures of cell-cell interaction scores and p values. Each row shows  
1202 a ligand-receptor pair, and each column shows the 2 interacting cell types, which is binned by cell  
1203 type. Columns are sub-ordered by first interacting cell type into stroma, podocytes, endothelial  
1204 cells, proximal tubule, loop of Henle and nephron progenitors. Color scale denotes the mean values  
1205 for all the interacting partners, where mean value refers to the total mean of the individual partner  
1206 average expression values in the interacting cell type pairs. Orange scale denotes P0, blue scale  
1207 denotes adult. Dot size denotes corresponding p values of the permutation test.

1208 (C) Dot plots of RNA expression of important cell-cell communication candidates within the Gdnf-  
1209 Ret, Sonic hedgehog, Fgf, Bmp, Wnt and other pathways in both P0 (top) and adult (bottom)  
1210 kidney. Dot size denotes percentage of cells expressing the marker. Color scale represents average  
1211 gene expression values, orange denotes P0, blue denotes adult. Arrows indicate ligand-receptor  
1212 pairs.

1213

1214 **Figure 6. Single cell level chromatin accessibility highlighted human kidney GWAS target**  
1215 **genes and cell types.**

1216 (A, C, E) From top to bottom: Cicero-inferred co-accessibility of open chromatin regions in mouse  
1217 orthologues of human *Shroom3*, *Dab2* and *Uncx* loci; Gene browser view of the single nucleotide  
1218 polymorphisms within the regions; gene browser view of chromatin accessibility for nephron  
1219 progenitors (NP), collecting duct intercalated cells (IC), collecting duct principal cell types (PC),  
1220 proximal tubules segment 1 and 3 (PT S1 and PT S3), loop of Henle (LOH), distal convoluted  
1221 tubule (DCT), stromal cells (stroma), podocytes (Podo), endothelial cells (Endo) and immune cells  
1222 (Immune). Right subpanel shows violin plots of scRNA-seq gene expression in P0 (orange) and  
1223 adult (blue) kidneys.

1224 (B, D, F) Whole kidney H3K27ac, H3K4me1 and Six2 ChIP-seq, whole genome bisulfate  
1225 sequencing (WGBS) and RNA-seq data in E15.5, P0 and adult kidney samples.

1226 **Supplemental Information**

1227

1228 **Supplemental Tables**

1229 **Supplemental Table 1.** Cell type marker genes derived from scRNA-seq analysis.

1230 **Supplemental Table 2.** Cell type-specific open chromatin derived from snATAC-seq analysis.

1231 **Supplemental Table 3.** Cell type-specific motif enrichment.

1232 **Supplemental Table 4.** Regulons and respective target genes inferred by SCENIC.

1233 **Supplemental Table 5.** Binarized regulon activities in each cell type inferred by SCENIC.

1234 **Supplemental Table 6.** Differentially expressed genes along pseudotime in distinct lineages in  
1235 scRNA-seq data.

1236 **Supplemental Table 7.** Differentially accessible peaks along pseudotime in distinct lineages in  
1237 snATAC-seq data.

1238 **Supplemental Table 8.** Nearest genes of differentially accessible peaks along pseudotime in  
1239 distinct lineages in snATAC-seq data.

1240 **Supplemental Table 9.** GO enrichment of differentially accessible peaks along pseudotime in  
1241 distinct lineages inferred by GREAT analysis.

1242 **Supplemental Table 10.** ChromVAR cell-TF enrichment score matrix.

1243 **Supplemental Table 11.** Nearest genes of differentially accessible peaks at bifurcation events  
1244 along pseudotime in distinct lineages inferred by GREAT analysis.

1245

1246

1247 **Supplemental Figures**

1248 **Figure S1. Quality control and data processing methods for snATAC-seq and scRNA-seq**  
1249 **data analysis.**

1250 (A) Insert size distribution of the 5 snATAC-seq samples showing periodic patterns.

1251 (B) Transcription start sites (TSS) signal enrichment of the 5 snATAC-seq samples.

1252 (C) Spearman correlation between snATAC-seq datasets and bulk ATAC-seq of binned genomic  
1253 regions.

1254 (D) Distribution of number of unique molecular identifiers (UMIs, x axis) and promoter ratio (y  
1255 axis) in 5 samples shown by dot plot.

1256 (E) Violin plots representing the number of accessible peaks across different clusters in the  
1257 snATAC-seq dataset indicating similar distributions.

1258 (F) UMAP representation of the snATAC-seq dataset colored by batches.

1259 (G) Stacked bar graphs representing absolute numbers and percentages of identified cell types  
1260 across snATAC-seq batches.

1261 (H) Genome browser view of cell type-specific peaks at the TSS of marker genes for 13 cell types  
1262 in the snATAC-seq dataset.

1263 (I) From left to right: Stacked bar graphs showing the percentage of different cell types in the P0  
1264 and adult scRNA-seq datasets, tables showing the number of cells in each cell type (nCells) and  
1265 corresponding percentage. NP, nephron progenitor; Podo, podocyte; PT, proximal tubule; S1,  
1266 segment 1; S3, segment 3; LOH, loop of Henle; DCT, distal convoluted tubule cells; PC, collecting  
1267 duct principal cells; IC, collecting duct intercalated cells; Endo, endothelial cells; Macro,  
1268 macrophages; Neutro, neutrophils.

1269 (J) UMAP representation of scRNA-seq data colored by the mitochondrial gene ratio (Mt %).

1270 (K) Violin plots showing number of informative genes per single cell and unique molecular  
1271 identifiers (UMIs) per single cell. Blue denotes adult kidney, orange denotes P0 kidney.

1272 (L, M) Principal component (PC) representation of combined adult and P0 scRNA-seq dataset (left  
1273 panel) and violin plots of corresponding embeddings values (right panel) before (L) and after (M)  
1274 batch correction using Harmony.

1275 (N) Dot plot of cell type-specific marker genes. Dot size denotes percentage of cells expressing  
1276 the marker. Color scale represents average expression, orange denotes P0, blue denotes adult  
1277 kidney.

1278 (O) Feature plots of representative marker genes projected on UMAP dimension.

1279 (P) Correlation between snATAC-seq gene activity scores and gene expression values in adult data,  
1280 which is complementary to **Figure 1g**.

1281 (Q) We provide the processed chromatin accessibility dataset via a searchable, interactive website  
1282 (<http://susztaklab.com/igv/>). Ace2 was used as an example, and we show proximal tubule-specific  
1283 enrichment of peaks at transcription start sites of the *Ace2* (Angiotensin-converting enzyme 2)  
1284 gene (red boxes).

1285

1286 **Figure S2. Characterization of the cell type-specific regulatory landscape**

1287 (A) Bar graph representing the number of accessible peaks in distal elements, promoters, introns,  
1288 5'-UTR, 3'UTR and exons, as distributed across samples of snATAC-seq data and bulk ATAC-  
1289 seq data.

1290 (B) Overlap of scATAC-seq differentially accessible peaks among cell types with H3K27Ac ChIP-  
1291 seq data.

1292 (C) Number of shared and unique peaks among snATAC-seq cell types. Cell types include nephron  
1293 progenitors and cells differentiated from nephron progenitors.

1294 (D) Genome browser view of *Umod* as an example for distal open chromatin region and its target  
1295 promoter region.

1296 (E) Distribution of different open chromatin elements in snATAC-seq cell types.

1297 (F) Distribution of different open chromatin elements among differentially accessible peaks (DAPs)  
1298 in snATAC-seq cell types.

1299 (G) Genome browser representations of single cell open chromatin data for individual cell types  
1300 at chromosomal loci around *Six2* and *Slc6a18*, along with their known distal elements (red boxes).  
1301 Corresponding chromosomal interaction of open chromatin regions, as inferred by Cicero  
1302 (**Methods**), is depicted at the top.

1303 (H) Genome browser views of representative marker genes demonstrating cell type-specific  
1304 chromatin accessibility for proximal tubule (*Hnf4a* and *Hmgb3*), several tubular segments (*Hnf1b*),  
1305 loop of Henle and distal convoluted tubule (*Esrrb* and *Ppargc1a*) as well as nephron progenitors  
1306 and podocytes (*Wt1*).

1307 (I) UMAP depiction of regulon activity (“on-blue”, “off-grey”) and RNA expression (red scale) of  
1308 exemplary regulons of proximal tubule (*Hnf1a*), nephron progenitors (*Six2*), loop of Henle  
1309 (*Ppargc1a*), proliferating cells (*Hmgb3*) and podocytes (*Mafb*), respectively. Exemplary target  
1310 gene expression for the respective TF is shown in purple scale.

1311

1312 **Figure S3. snATAC-seq and scRNA-seq cell differentiation trajectories.**

1313 (A) UMAP representation of snATAC-seq trajectory lineages of podocytes, proximal tubule and  
1314 loop of Henle cells from nephron progenitors colored by 2 P0 batches.

1315 (B) UMAP representation of snATAC-seq trajectory lineages of podocytes, proximal tubule and  
1316 loop of Henle cells from nephron progenitors colored by original cell type assignment as in **Figure**  
1317 **1b**.

1318 (C) UMAP representation of scRNA-seq trajectory lineages of podocytes, proximal tubule and  
1319 loop of Henle cells from nephron progenitors colored by original cell type assignment as in **Figure**  
1320 **1b**.

1321 (D) UMAP representation of RNA velocity of scRNA-seq trajectory inferred by VelocityR,  
1322 colored by original cell type assignment. Each dot is one cell and each arrow represents the time  
1323 derivative of the gene expression state.

1324 (E) UMAP representation of snATAC-scRNA integration results colored by cell type assignment.

1325 (F) UMAP representation of snATAC-scRNA integration results colored by technologies  
1326 (snATAC=red, scRNA=grey). Podo: podocytes, PT: proximal tubule, LOH: loop of Henle, DCT:  
1327 distal convoluted tubule, NP: nephron progenitors, IM: intermediate stage cells.

1328 (G) Dot plot showing snATAC-scRNA integration cell type assignment confusion matrix. Each  
1329 column represents the original cell type assignment of snATAC-seq data, and each row represents  
1330 the predicted cell type assignment by the integration analysis scRNA-seq data. Each dot represents  
1331 the number of cells that were matched in the integrated data.

1332 (H) Heatmap of chromVAR enrichment results. The original data matrix is given in **Supplemental**  
1333 **Table 10**.

1334 (I) Pseudotime-dependent chromatin accessibility and gene expression changes along the proximal  
1335 tubule (red), podocytes (green) and loop of Henle (blue) cell lineages. The first column represents  
1336 the dynamics of chromVAR TF enrichment score, the second column represents the dynamics of  
1337 TF gene expression values, and the third and fourth column represent the dynamics of SCENIC-  
1338 reported target gene expression values.

1339



1340 **Figure S4. Chromatin dynamics of nephron progenitor differentiation.**

1341 (A) Di-graph representing cell type and lineage divergence, as derived from Cicero trajectory  
1342 inference. Nephron progenitors (NP), podocytes (Podo), intermediate stage (IM), proximal tubule  
1343 (PT), loop of Henle (LOH) and distal convoluted tubule (DCT) are connected with their  
1344 developmental precursor stages and ordered by ascending numbering. Pie charts represent  
1345 differentially assessible peaks (DAPs) between two stages, where the size of pie charts is  
1346 proportional to the number of DAPs, orange color represents the number of open peaks, grey color  
1347 the number of closed peaks. Bar graphs depict gene ontology (GO) term analysis of genes nearby  
1348 DAPs derived from GREAT analysis (full list in **Supplemental Table 9**).

1349 (B) Immunofluorescence staining of fetal mouse kidney. Upper panel and insert denote E13.5 stage,  
1350 lower panel denotes P6 mouse. Blue staining represents nuclei (DAPI), green staining represents  
1351 tubular epithelium (E-Cadherin) and red staining represents progenitor cells (FOXL1) along a  
1352 developmental trajectory from early progenitor stage (asterisk) over comma-shaped (+) and S  
1353 shaped bodies (cross) towards podocytes within primitive glomeruli (#).

1354 (C) Pseudotime-dependent chromatin accessibility and gene expression changes along the  
1355 proximal tubule (red), podocytes (green) and loop of Henle (LOH, blue) cell lineages for important  
1356 bifurcation TFs in the podocyte (*Foxl1*) and distal tubule (*Tfap2b*) lineage.

1357 (D) Bar graphs denote the percentage of cells with accessible chromatin of several *Six2* promoters  
1358 and enhancers (gene loci numbered 1-3) as well as putative *Foxl1* enhancers (gene loci numbered  
1359 4-7) along pseudotime. Exact gene loci of enhancers and promoters are given above each  
1360 respective graph. Changes along pseudotime are depicted for 3 lineages from nephron progenitors  
1361 (NP) to podocytes, proximal tubule (PT) and loop of Henle (LOH) cells, respectively. The right  
1362 upper subpanel depicts the genome browser overview of chromatin accessibility for the NP and  
1363 therefore corresponds to the first bar in graphs on the left. The right lower subpanel depicts zoom-  
1364 in versions of the 7 loci for all 3 lineages.

1365  
1366 **Figure S5. Single cell level chromatin accessibility highlighted human kidney GWAS target**  
1367 **genes and cell types.**

1368 Open chromatin and co-accessibility view at alternative scales to those shown in **Figure 6**.

1369 (A, C, E) From top to bottom: Cicero-inferred co-accessibility of open chromatin regions in mouse  
1370 orthologues of human *Shroom3*, *Dab2* and *Uncx* loci; Gene browser view of the single nucleotide

1371 polymorphisms within the regions; gene browser view of chromatin accessibility for nephron  
1372 progenitors (NP), collecting duct intercalated cells (IC), collecting duct principal cell types (PC),  
1373 proximal tubules segment 1 and 3 (PT S1 and PT S3), loop of Henle (LOH), distal convoluted  
1374 tubule (DCT), stromal cells (stroma), podocytes (Podo), endothelial cells (Endo) and immune cells  
1375 (Immune). Right subpanel shows violin plots of scRNA-seq gene expression in P0 (orange) and  
1376 adult (blue) kidneys.  
1377 (B, D, F) Whole kidney H3K27ac, H3K4me1 and Six2 ChIP-seq, whole genome bisulfate  
1378 sequencing (WGBS) and RNA-seq data in E15.5, P0 and adult kidney samples.

# Figure 1

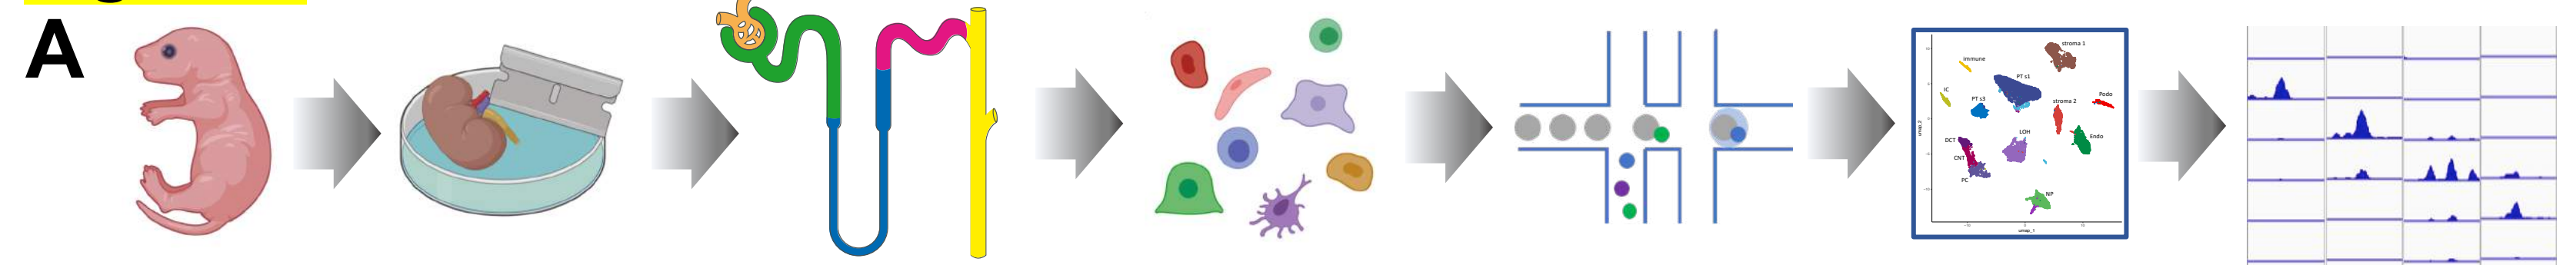

## B snATAC (28,316 cells)

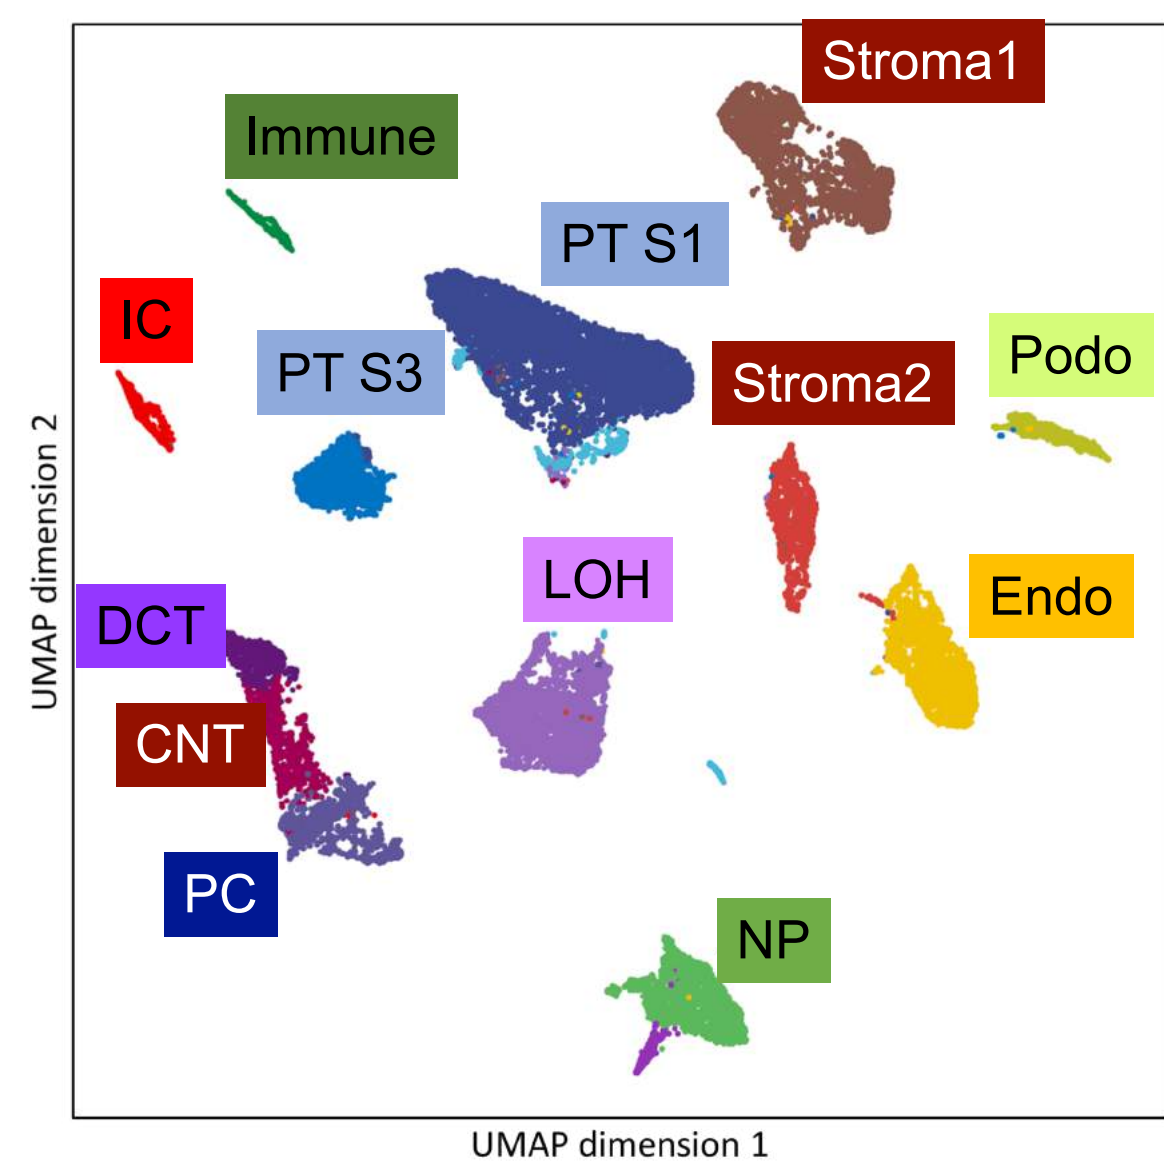

## scRNA (43,636 cells)

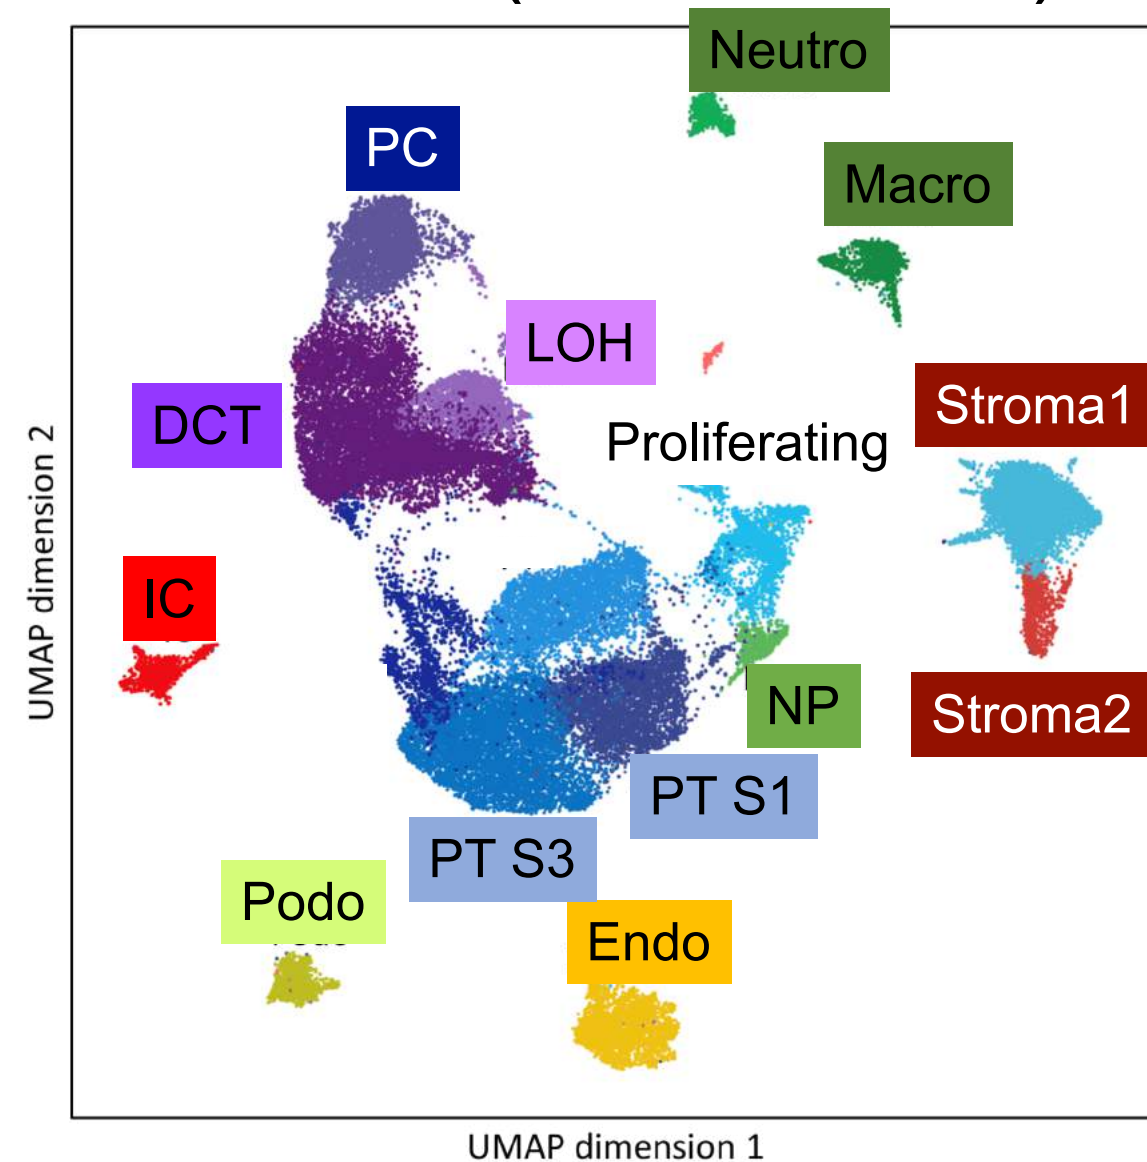

## C

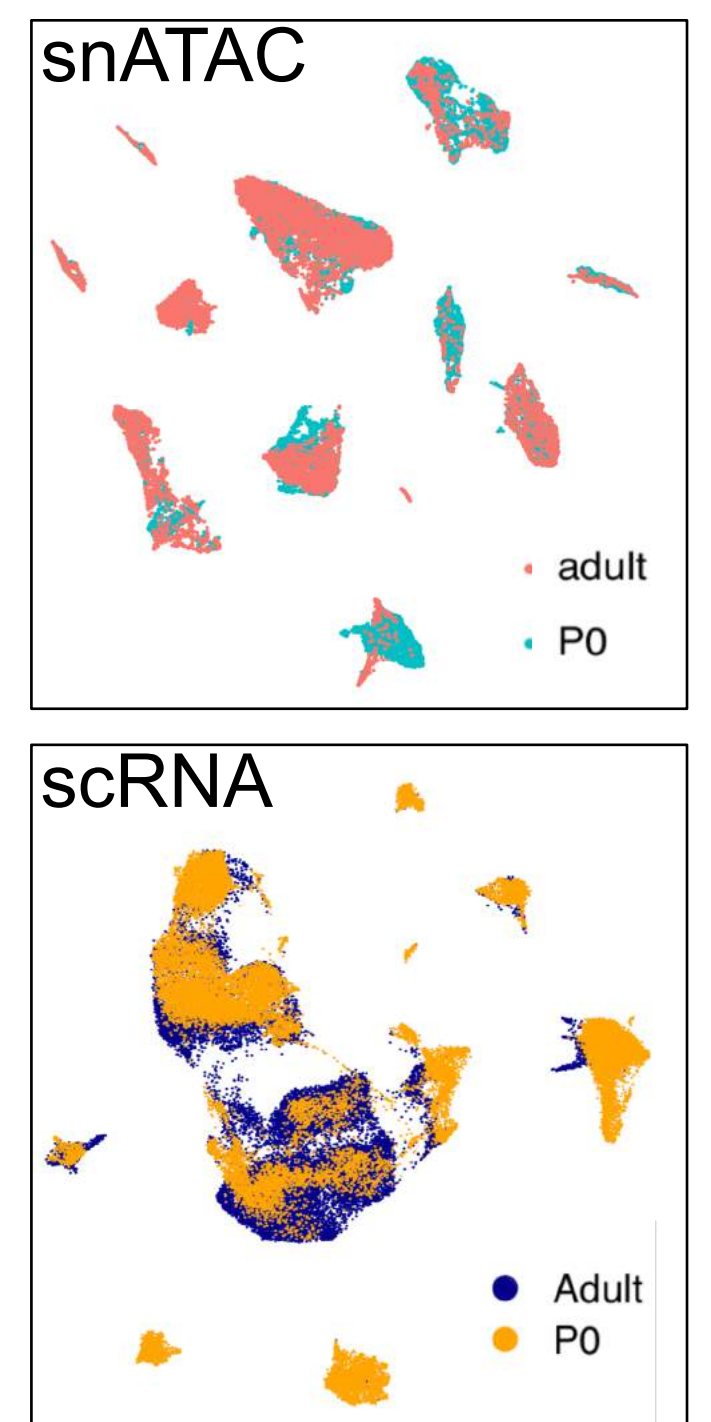

## D

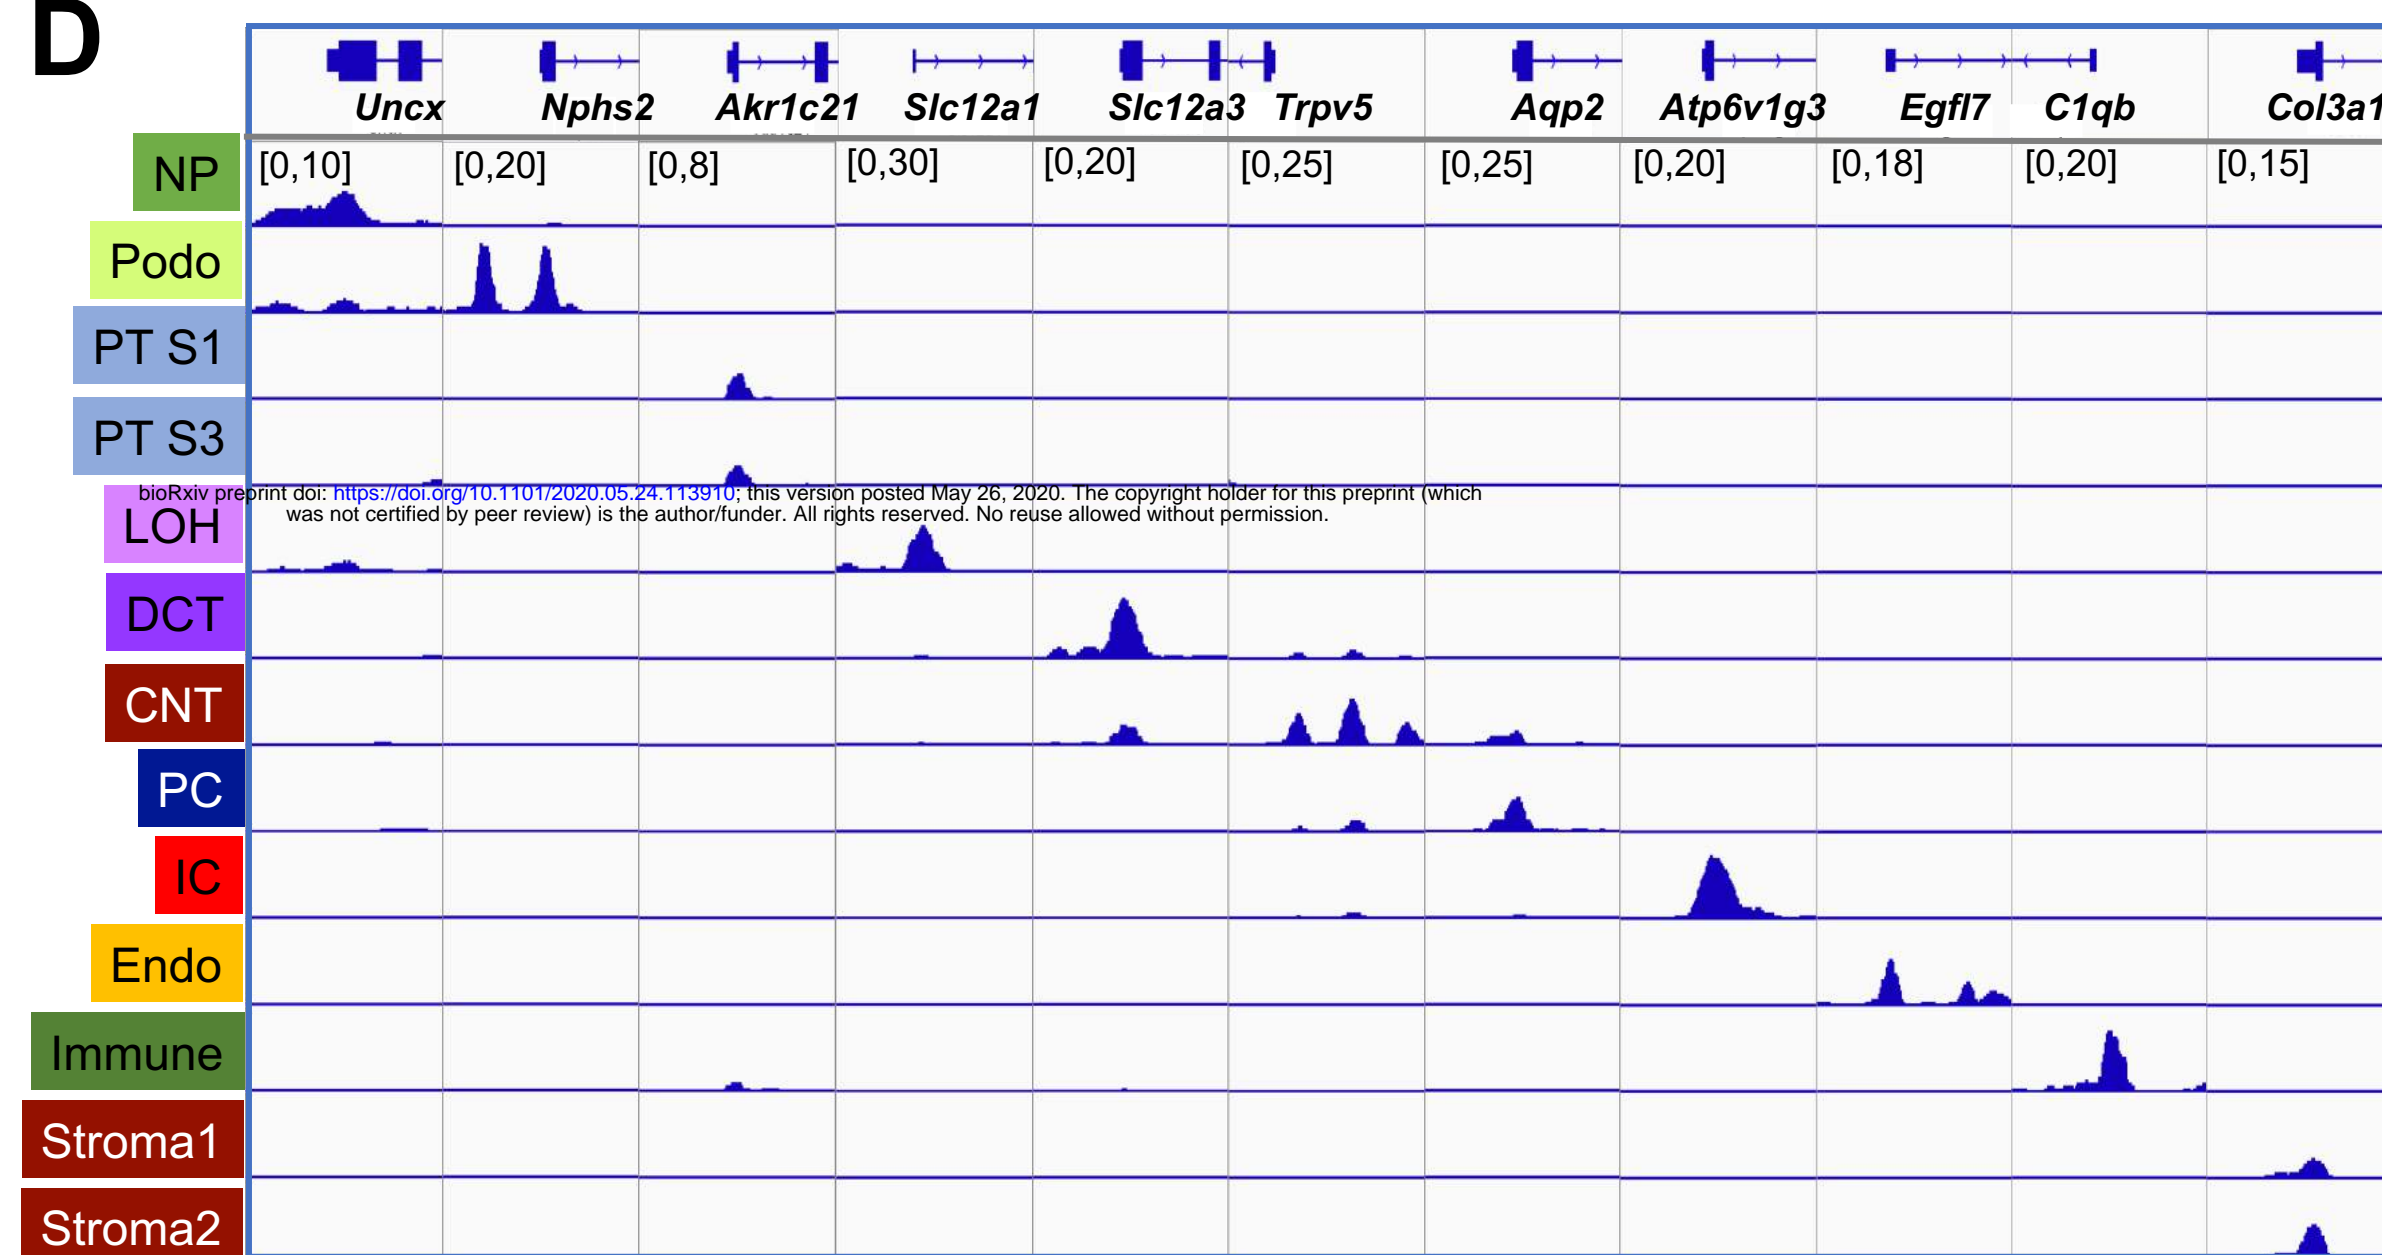

## E

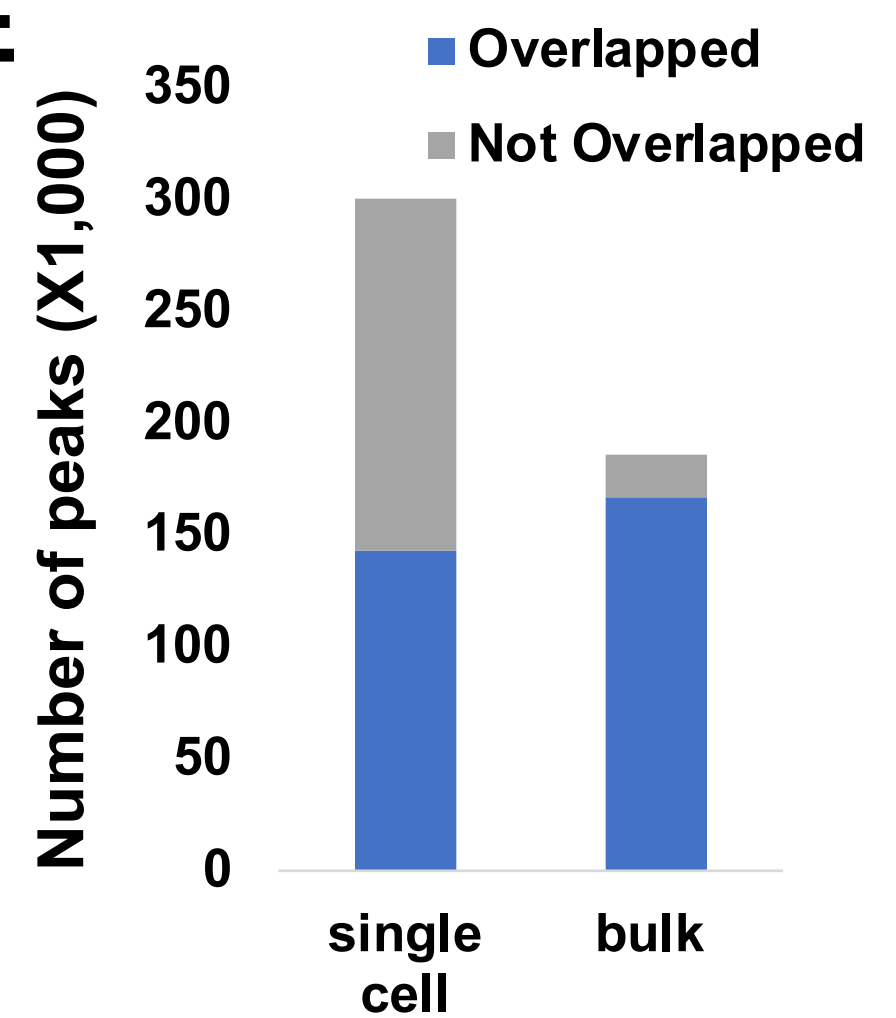

## F

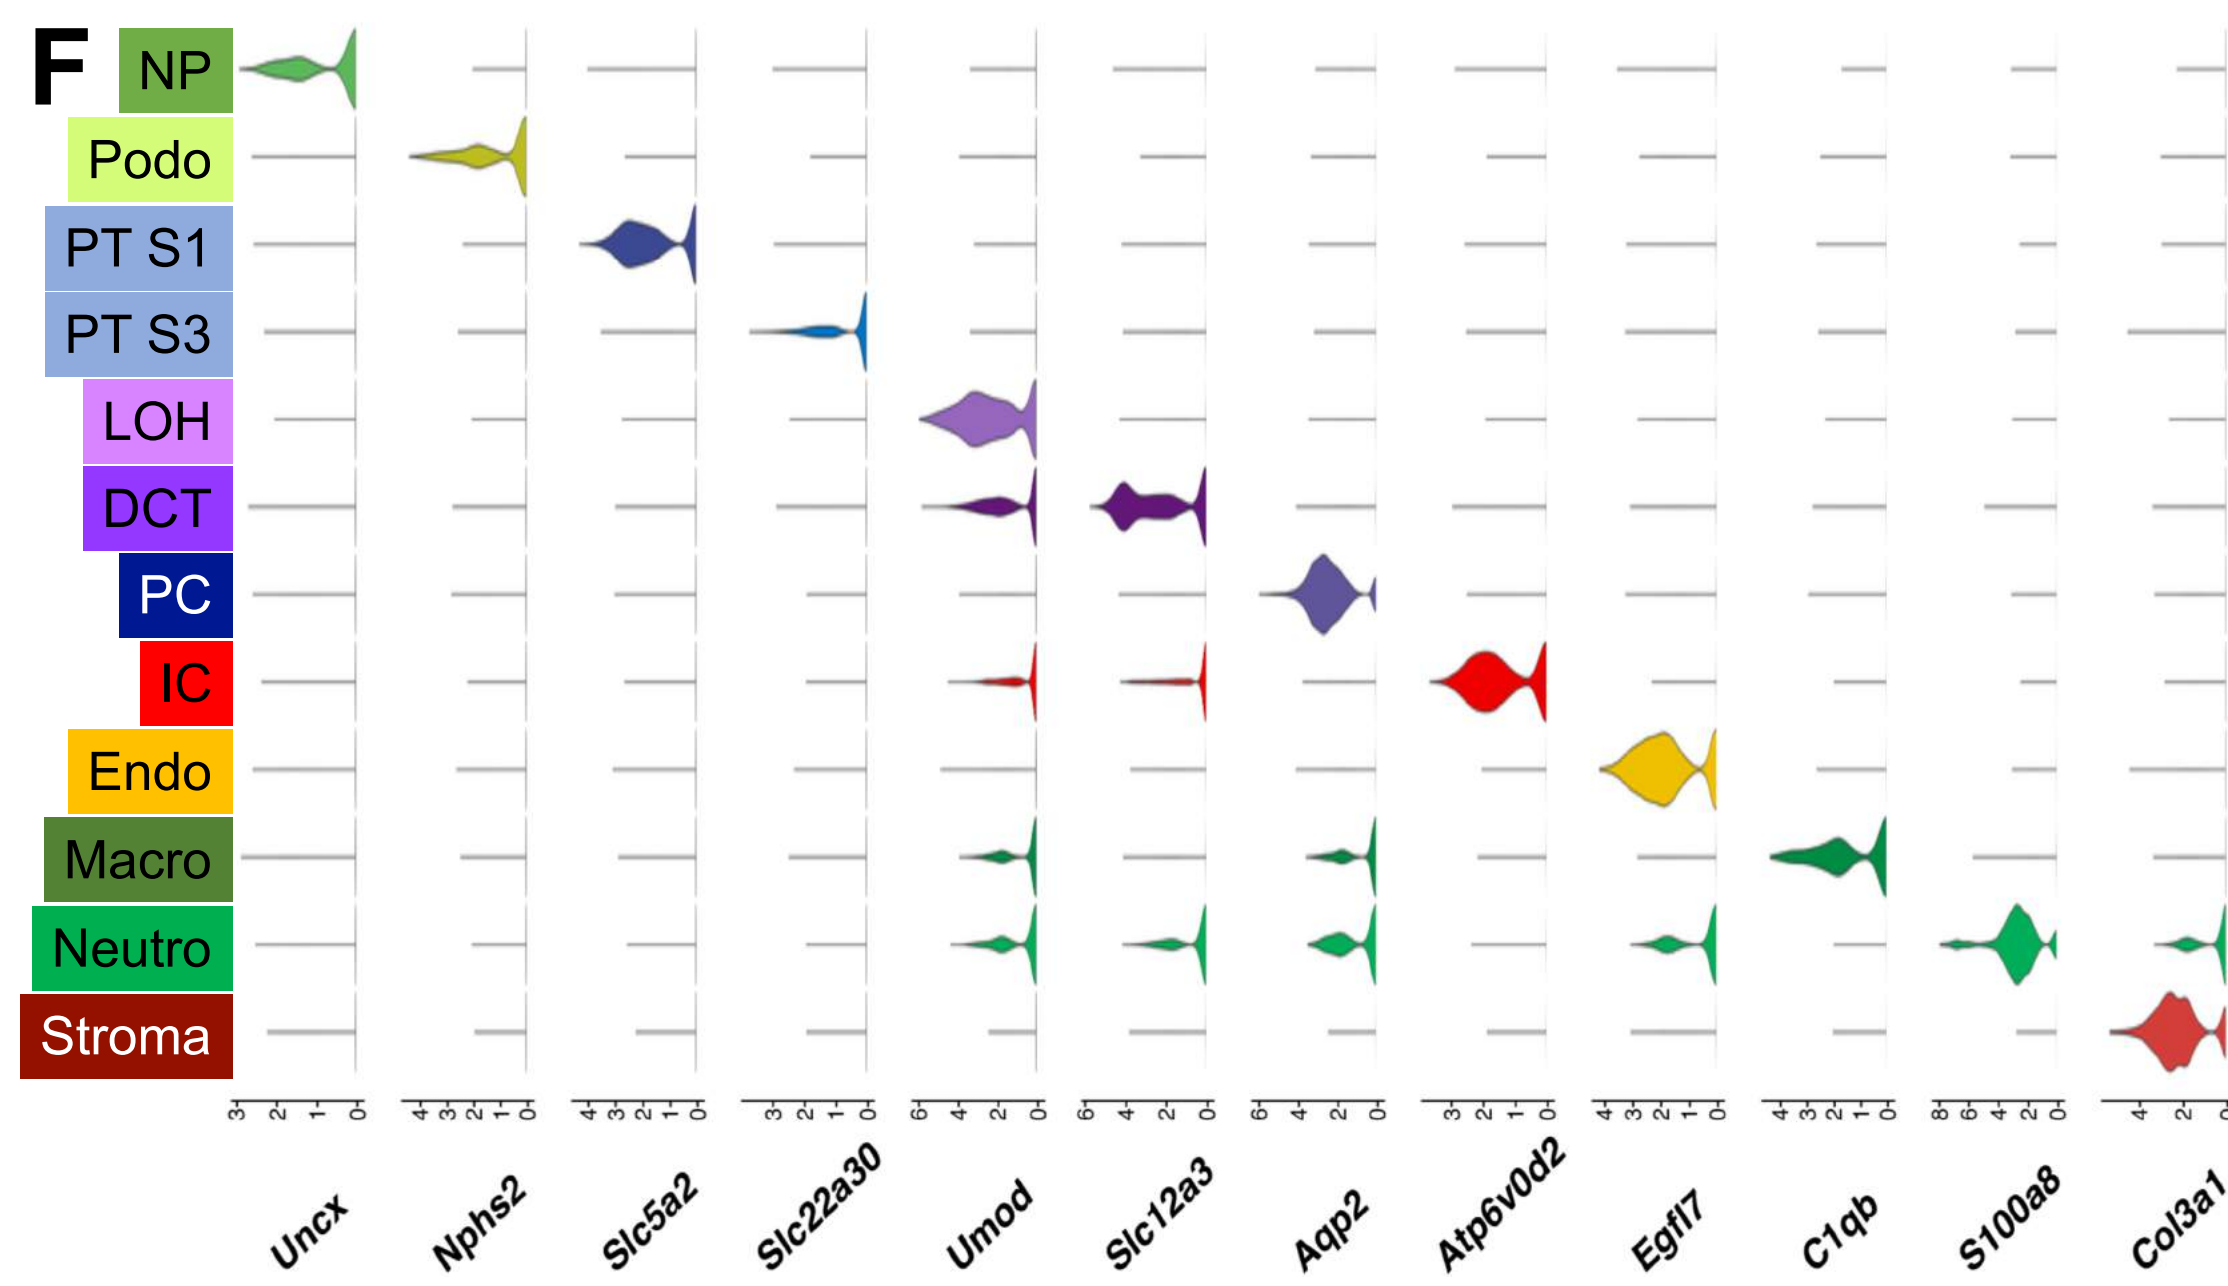

## G

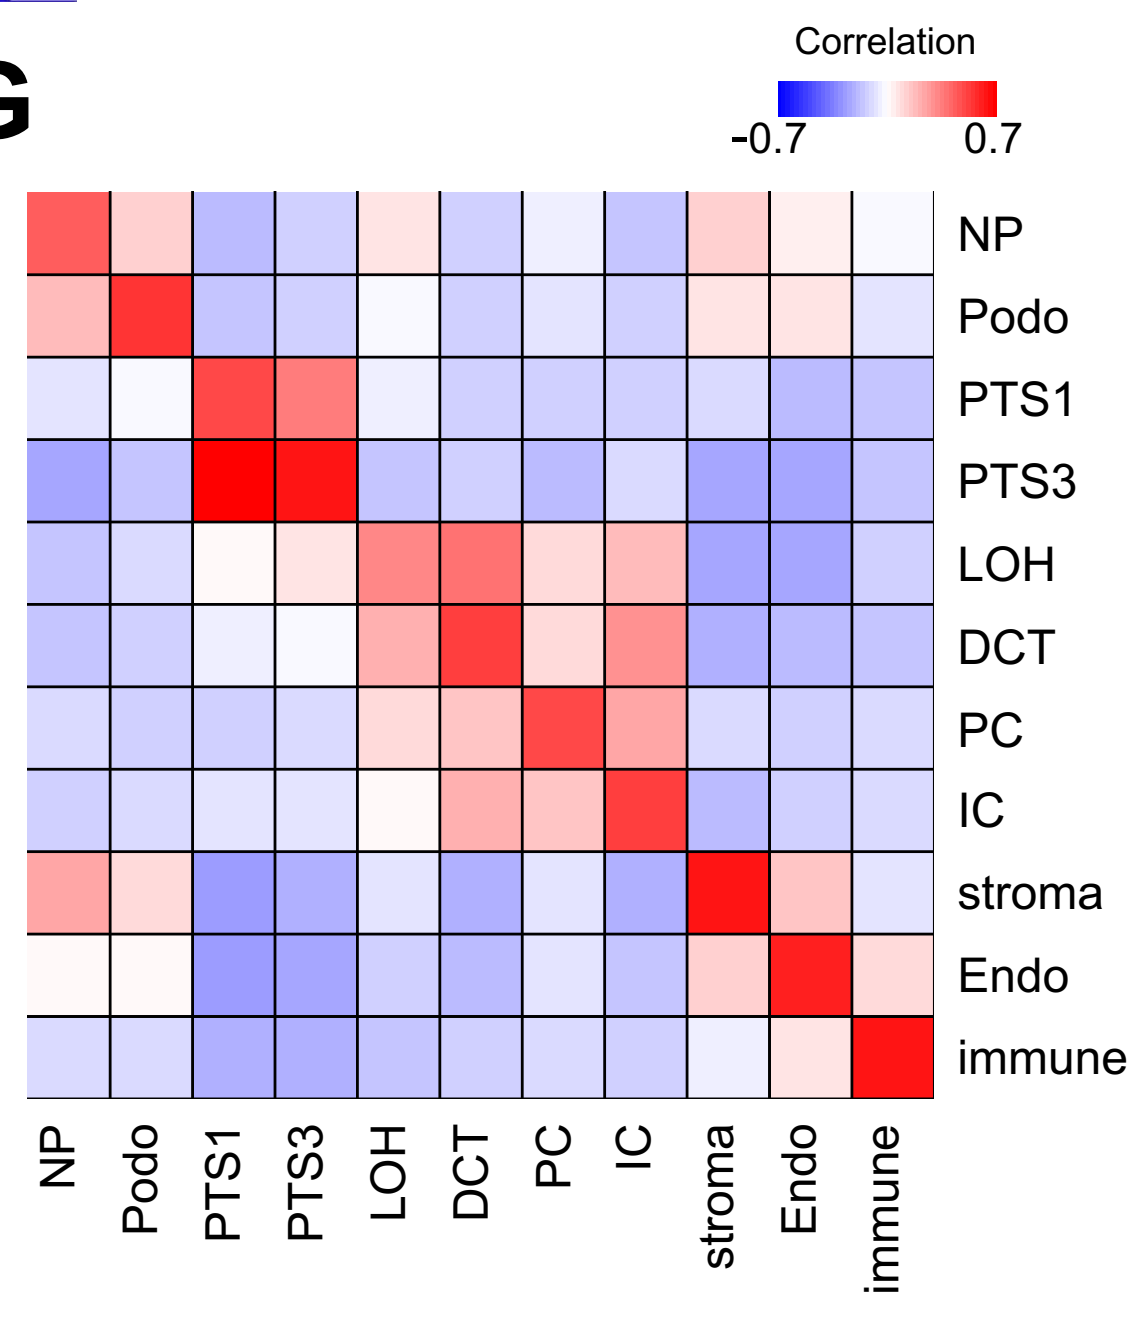

**Figure 2**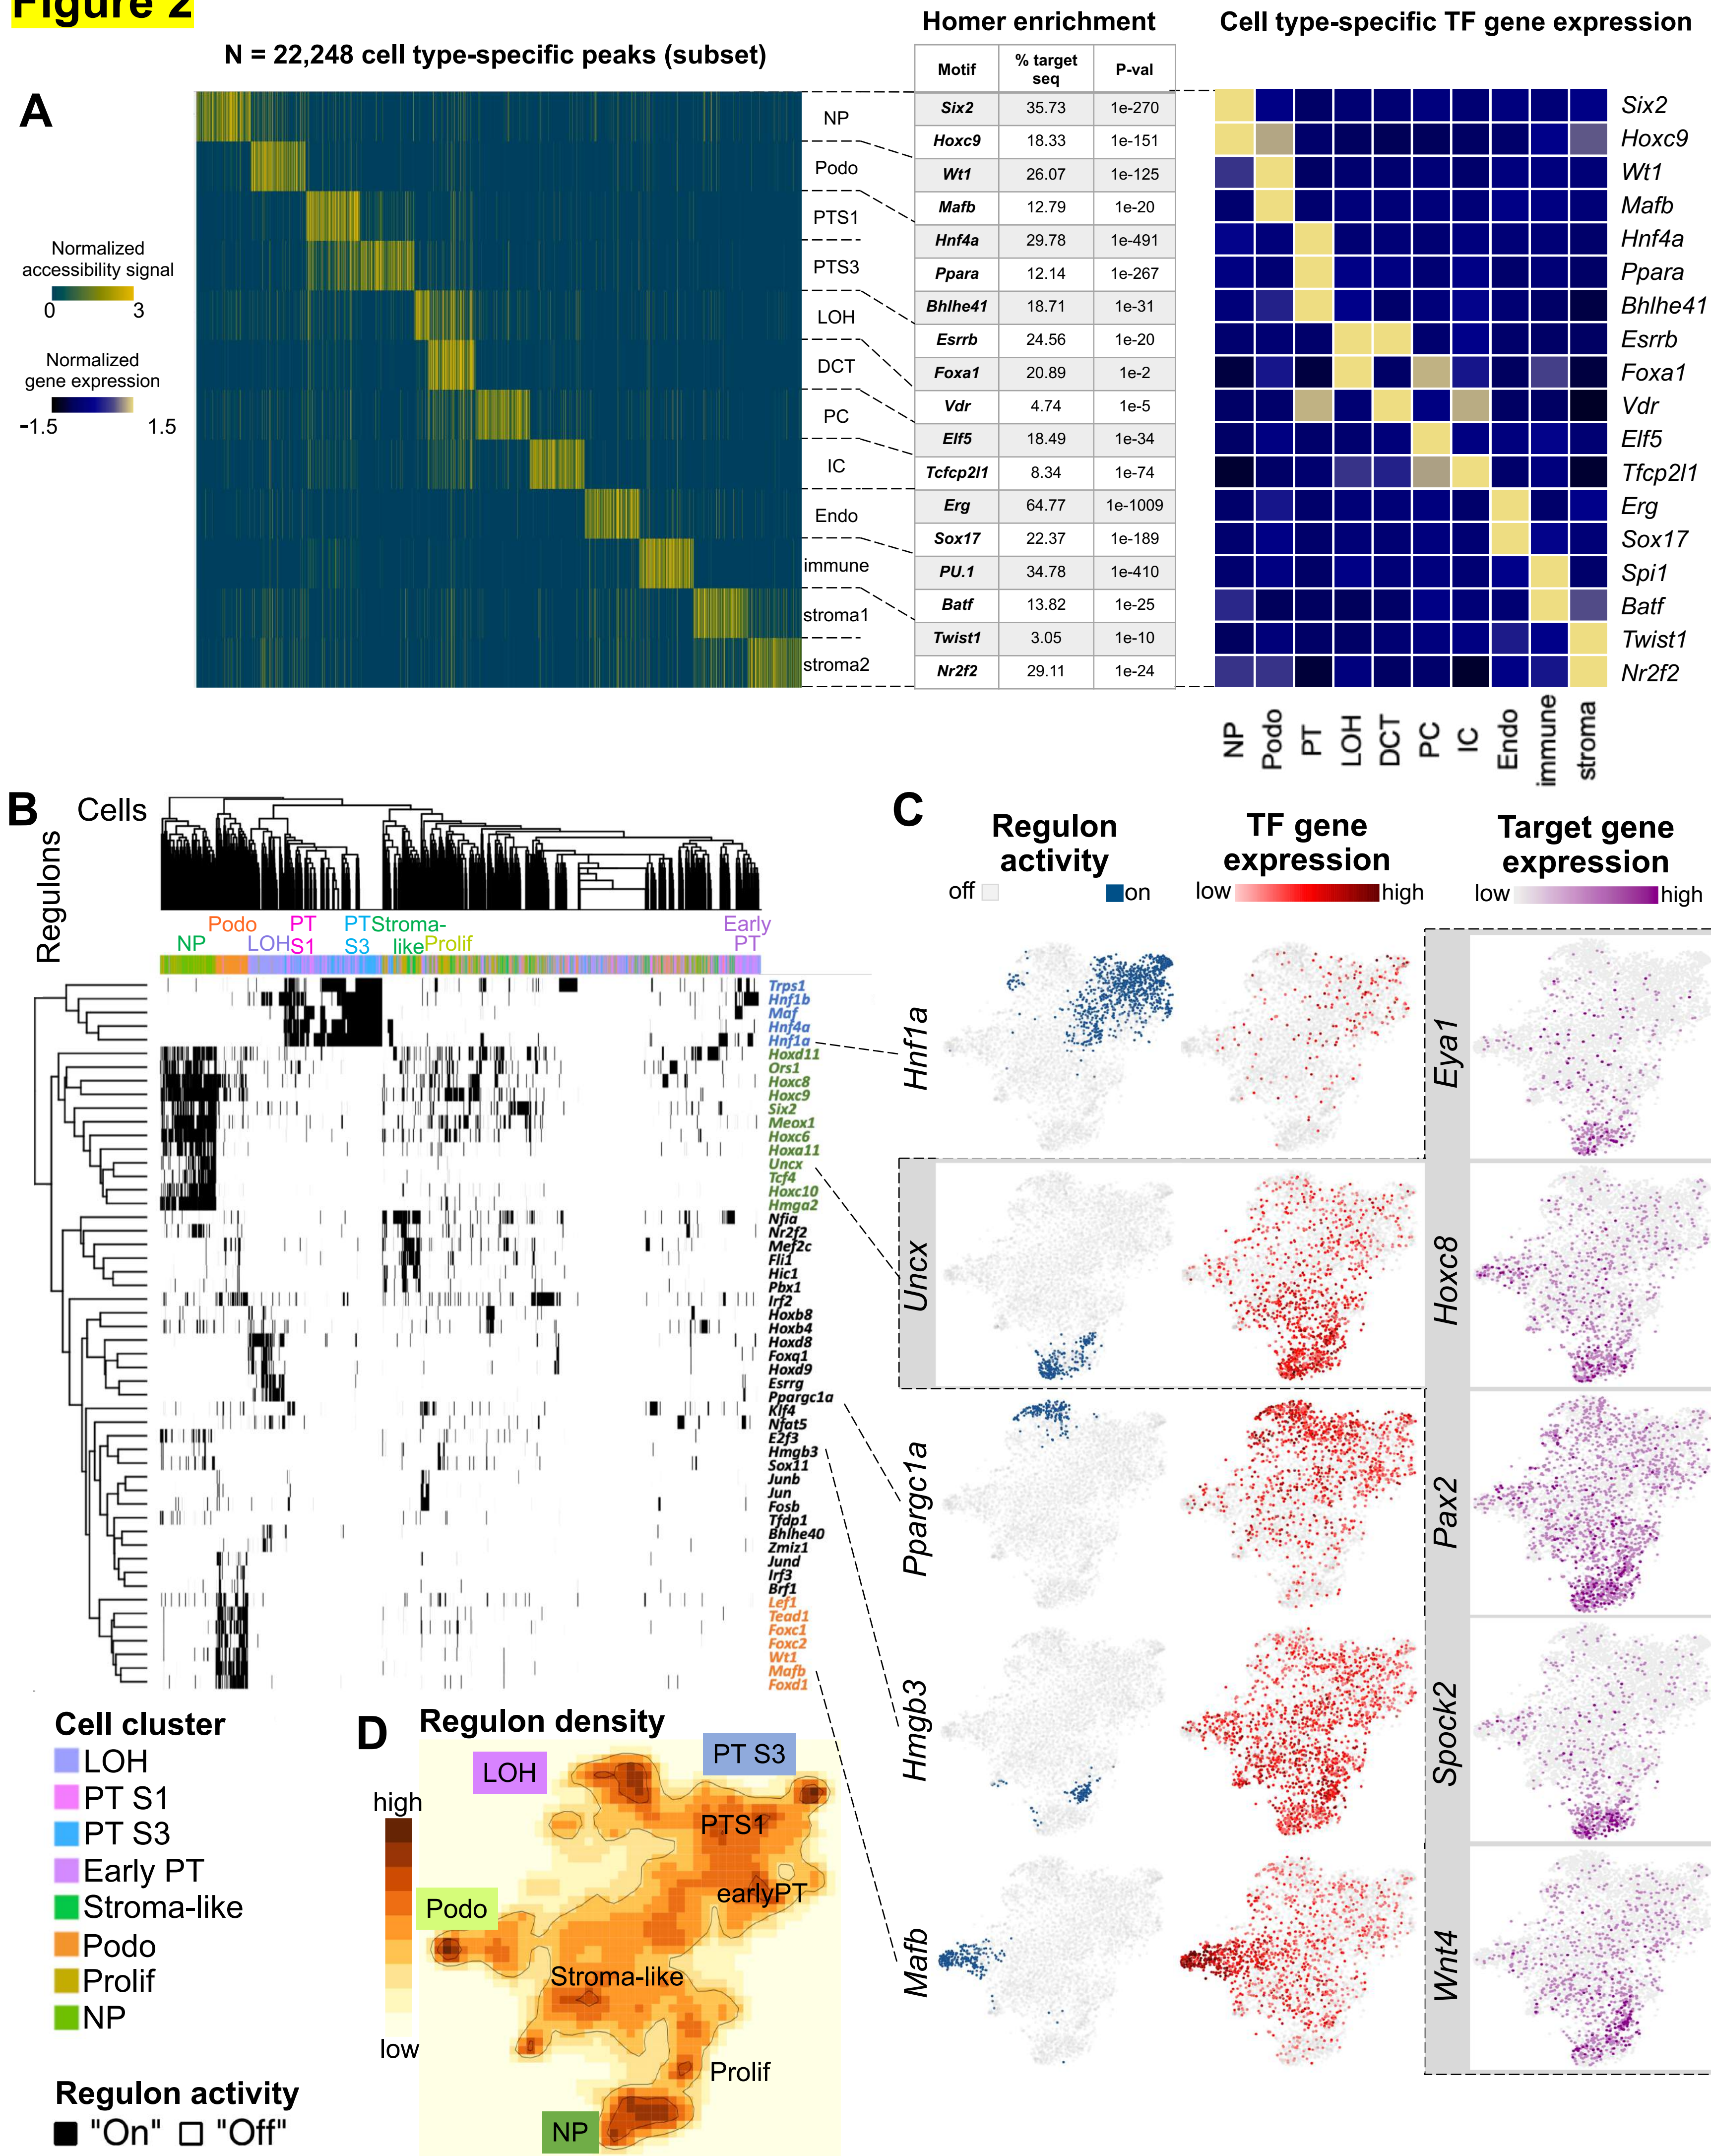

**Figure 3****A** snATAC-seq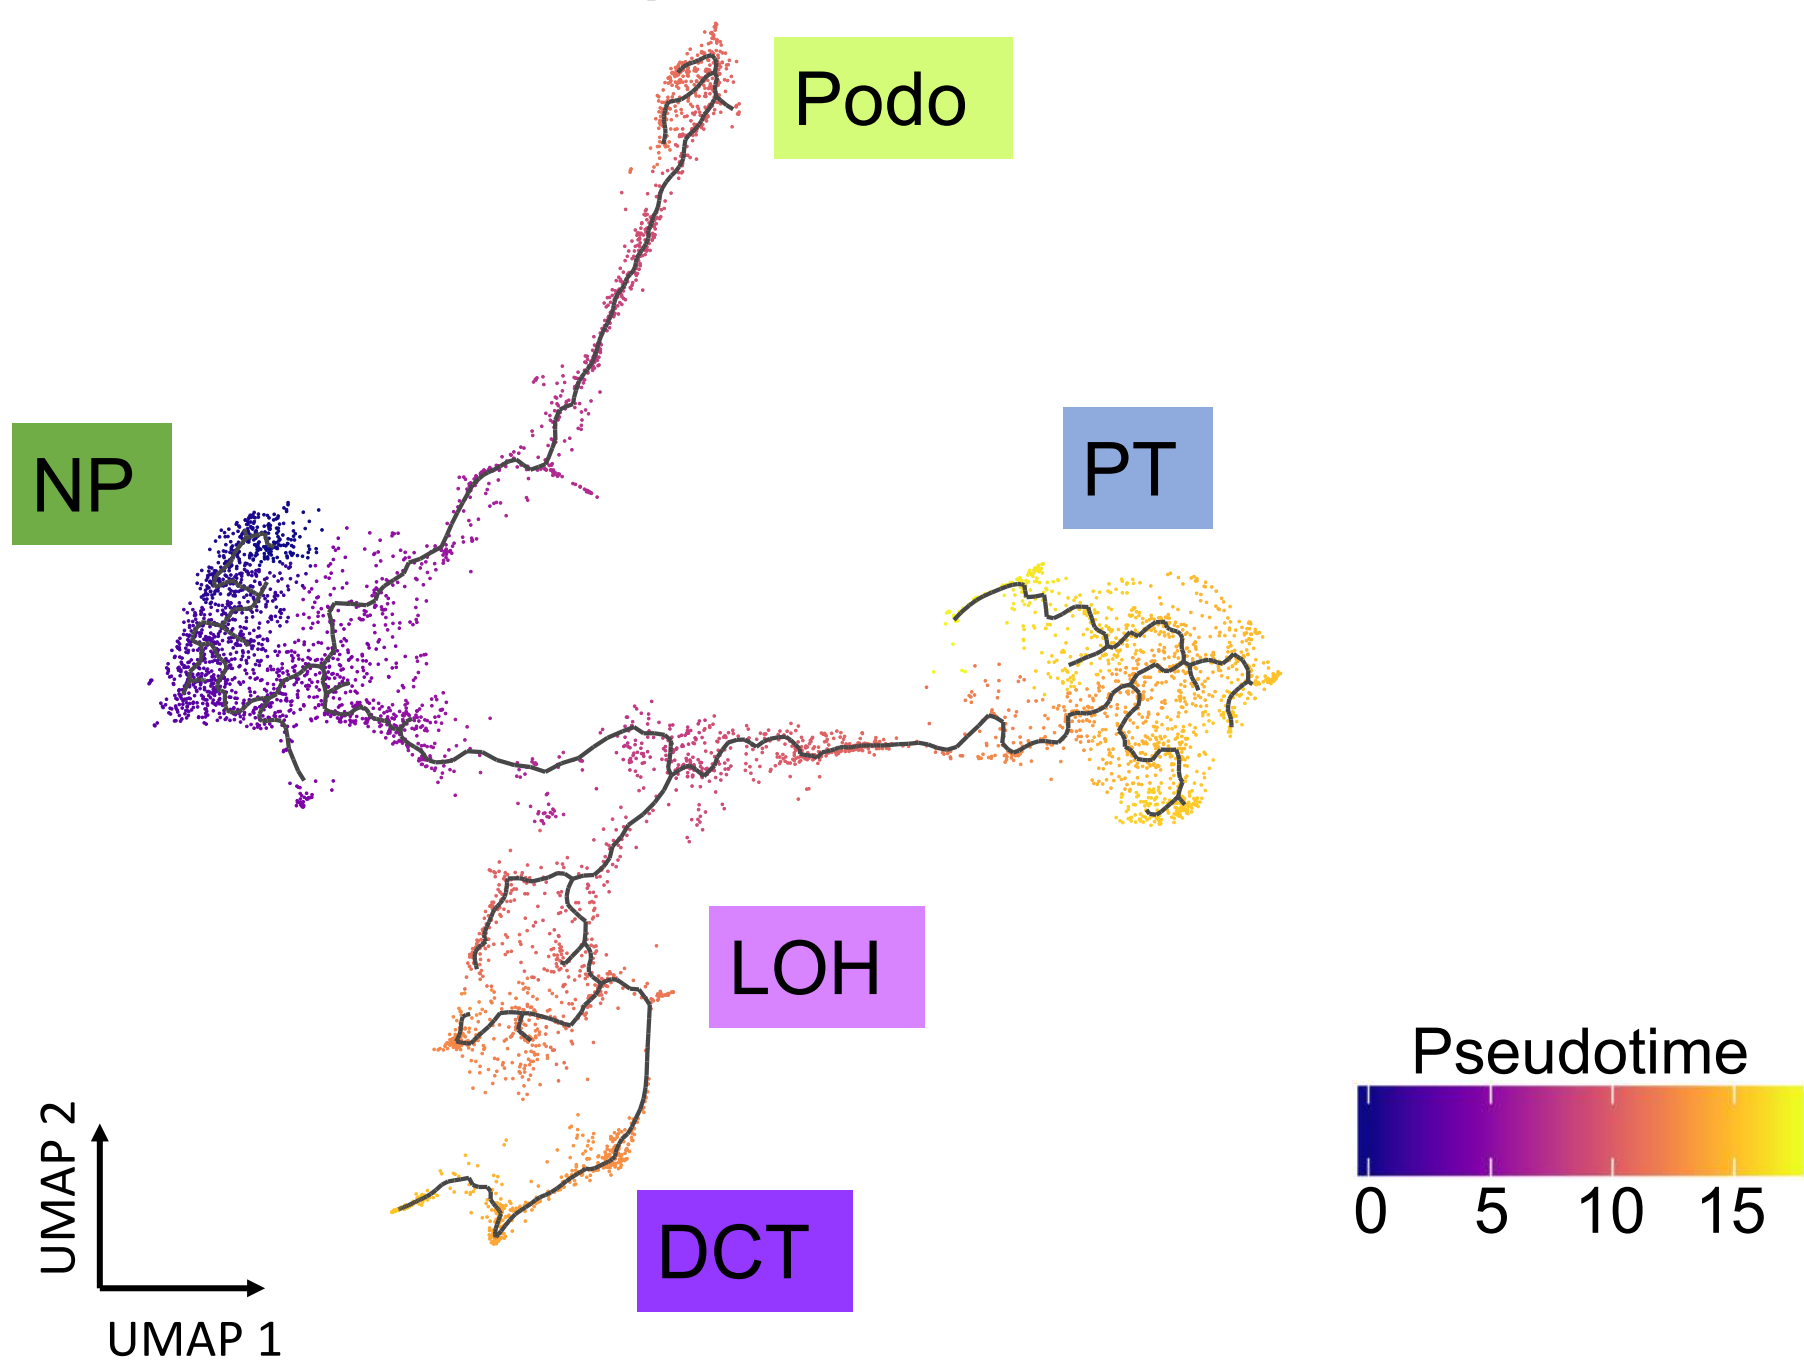**B** scRNA-seq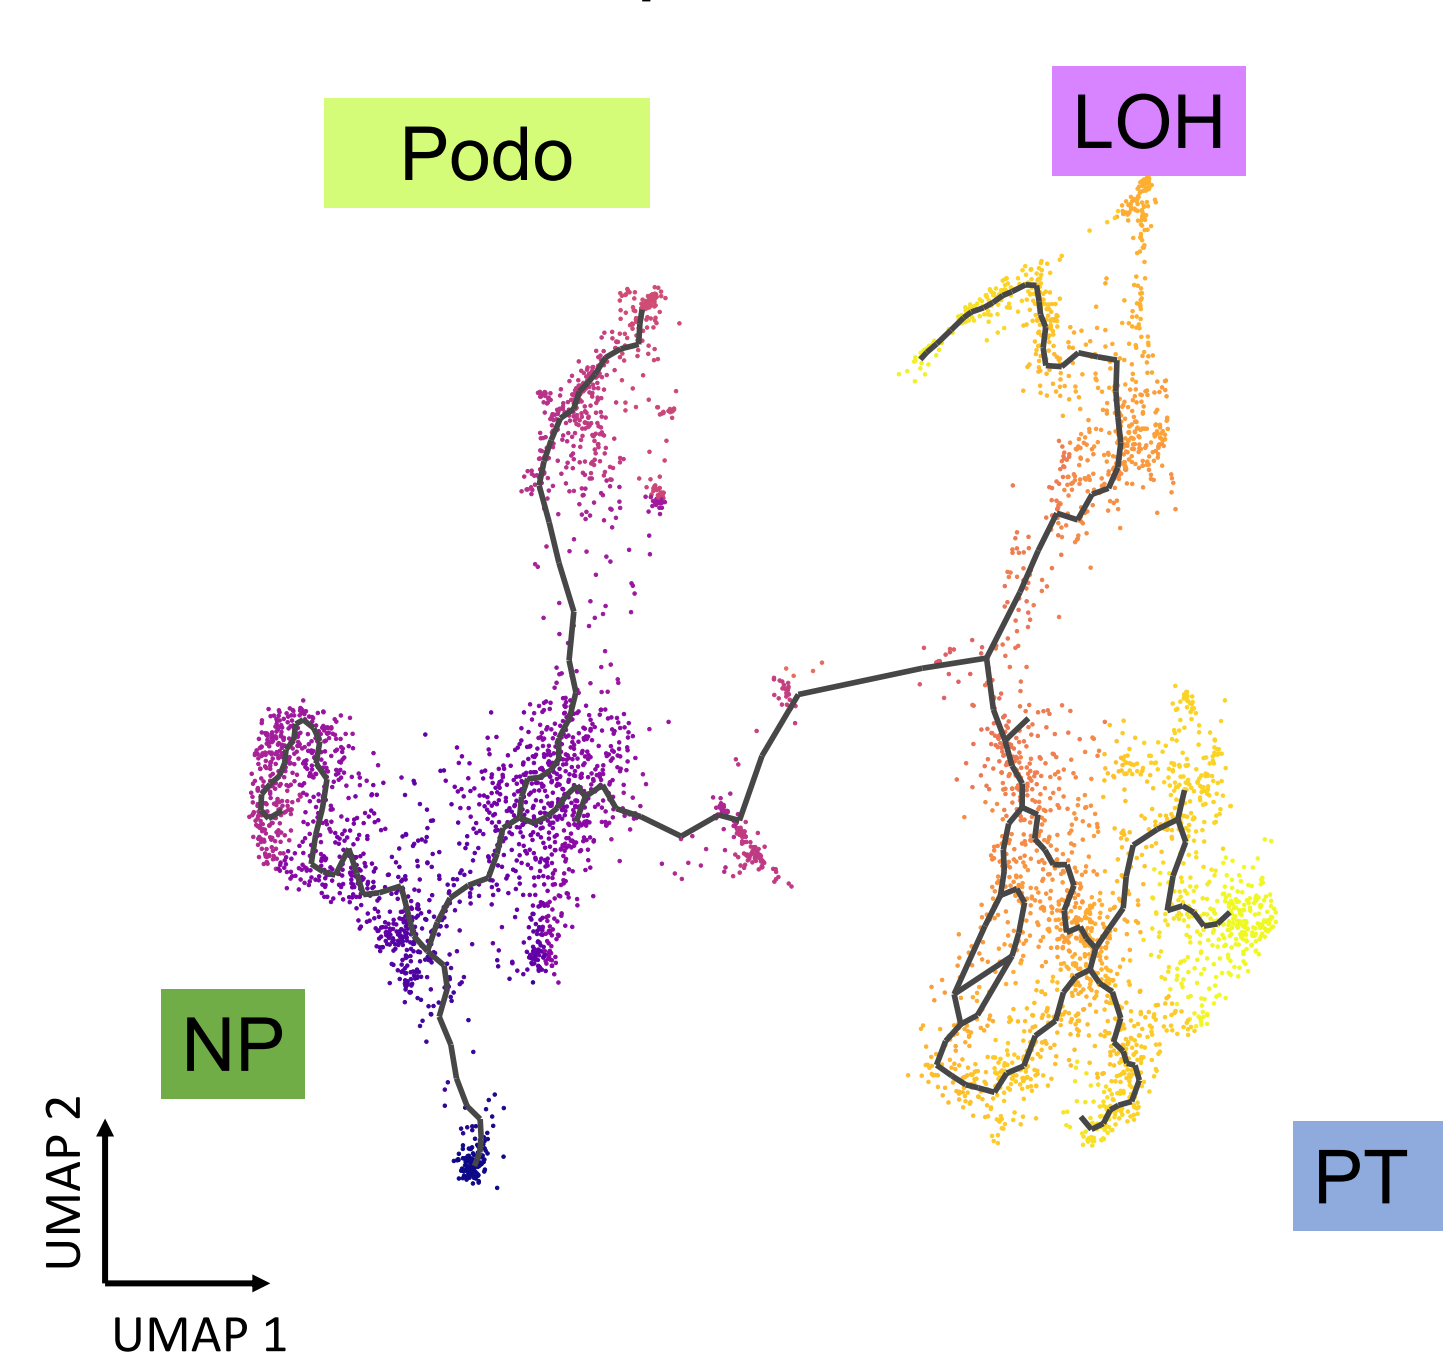**C** chromVAR TF enrichment

## TF expression

## Target gene expression

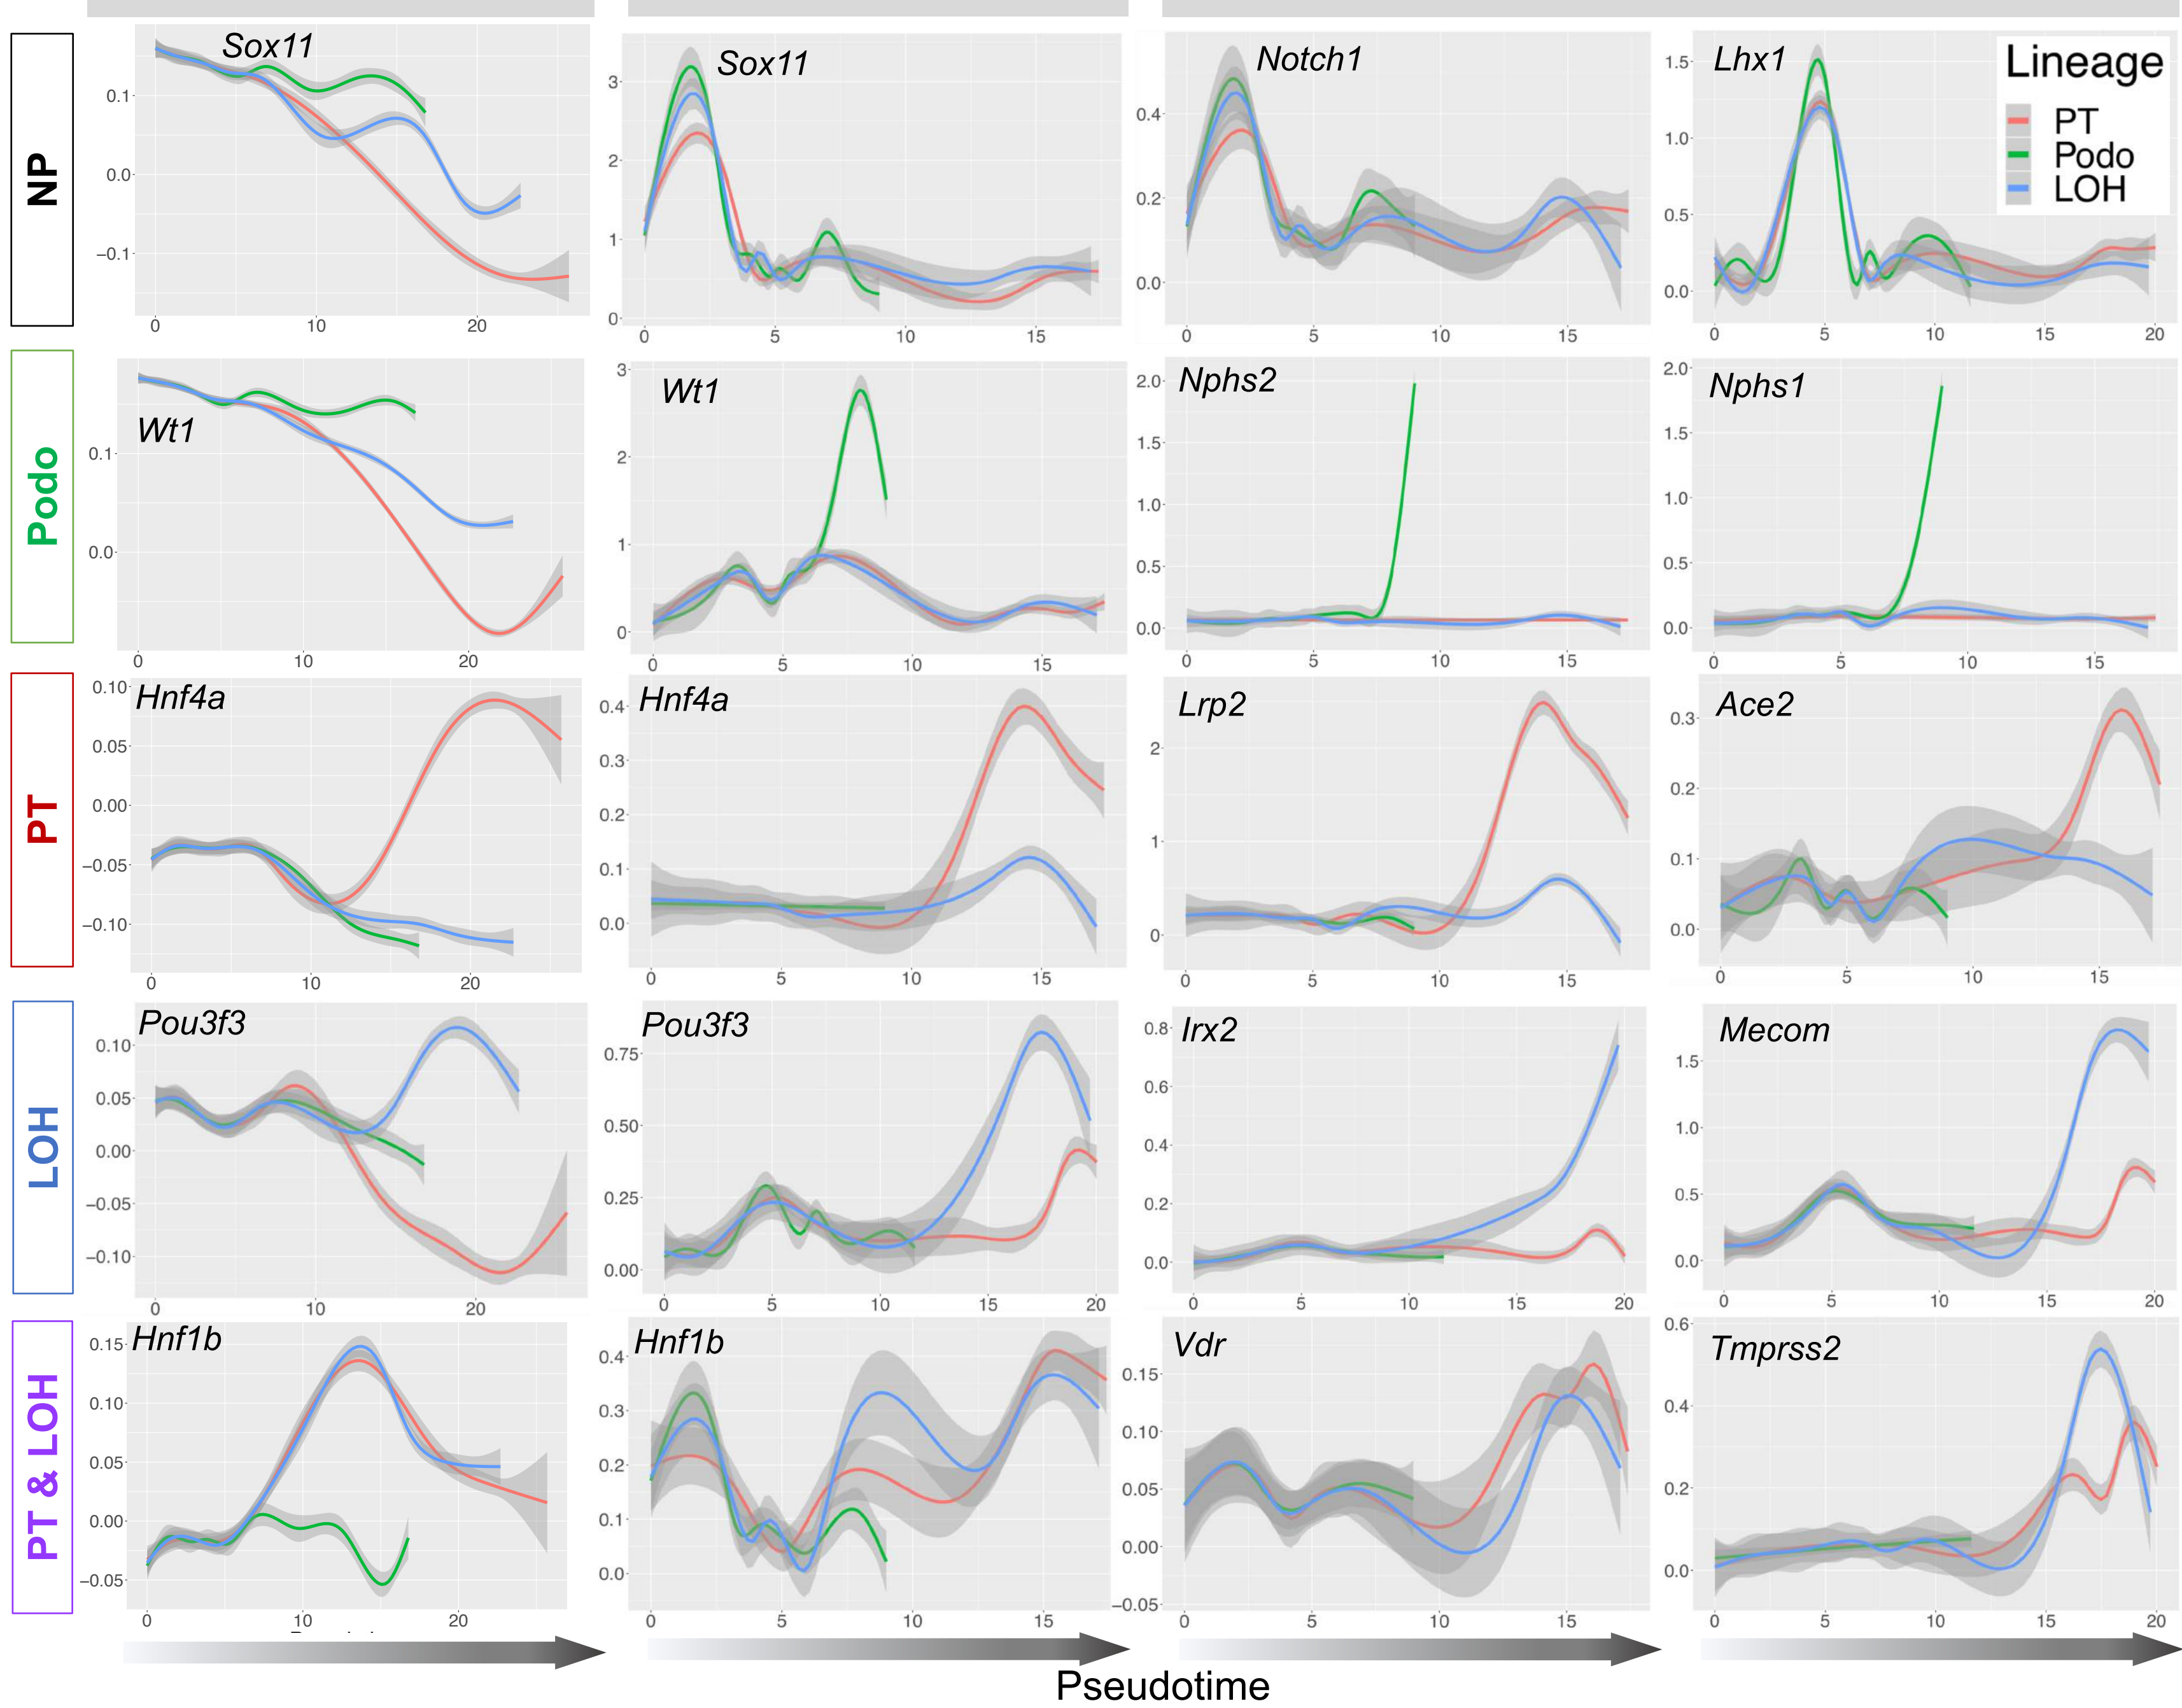

**Figure 4**

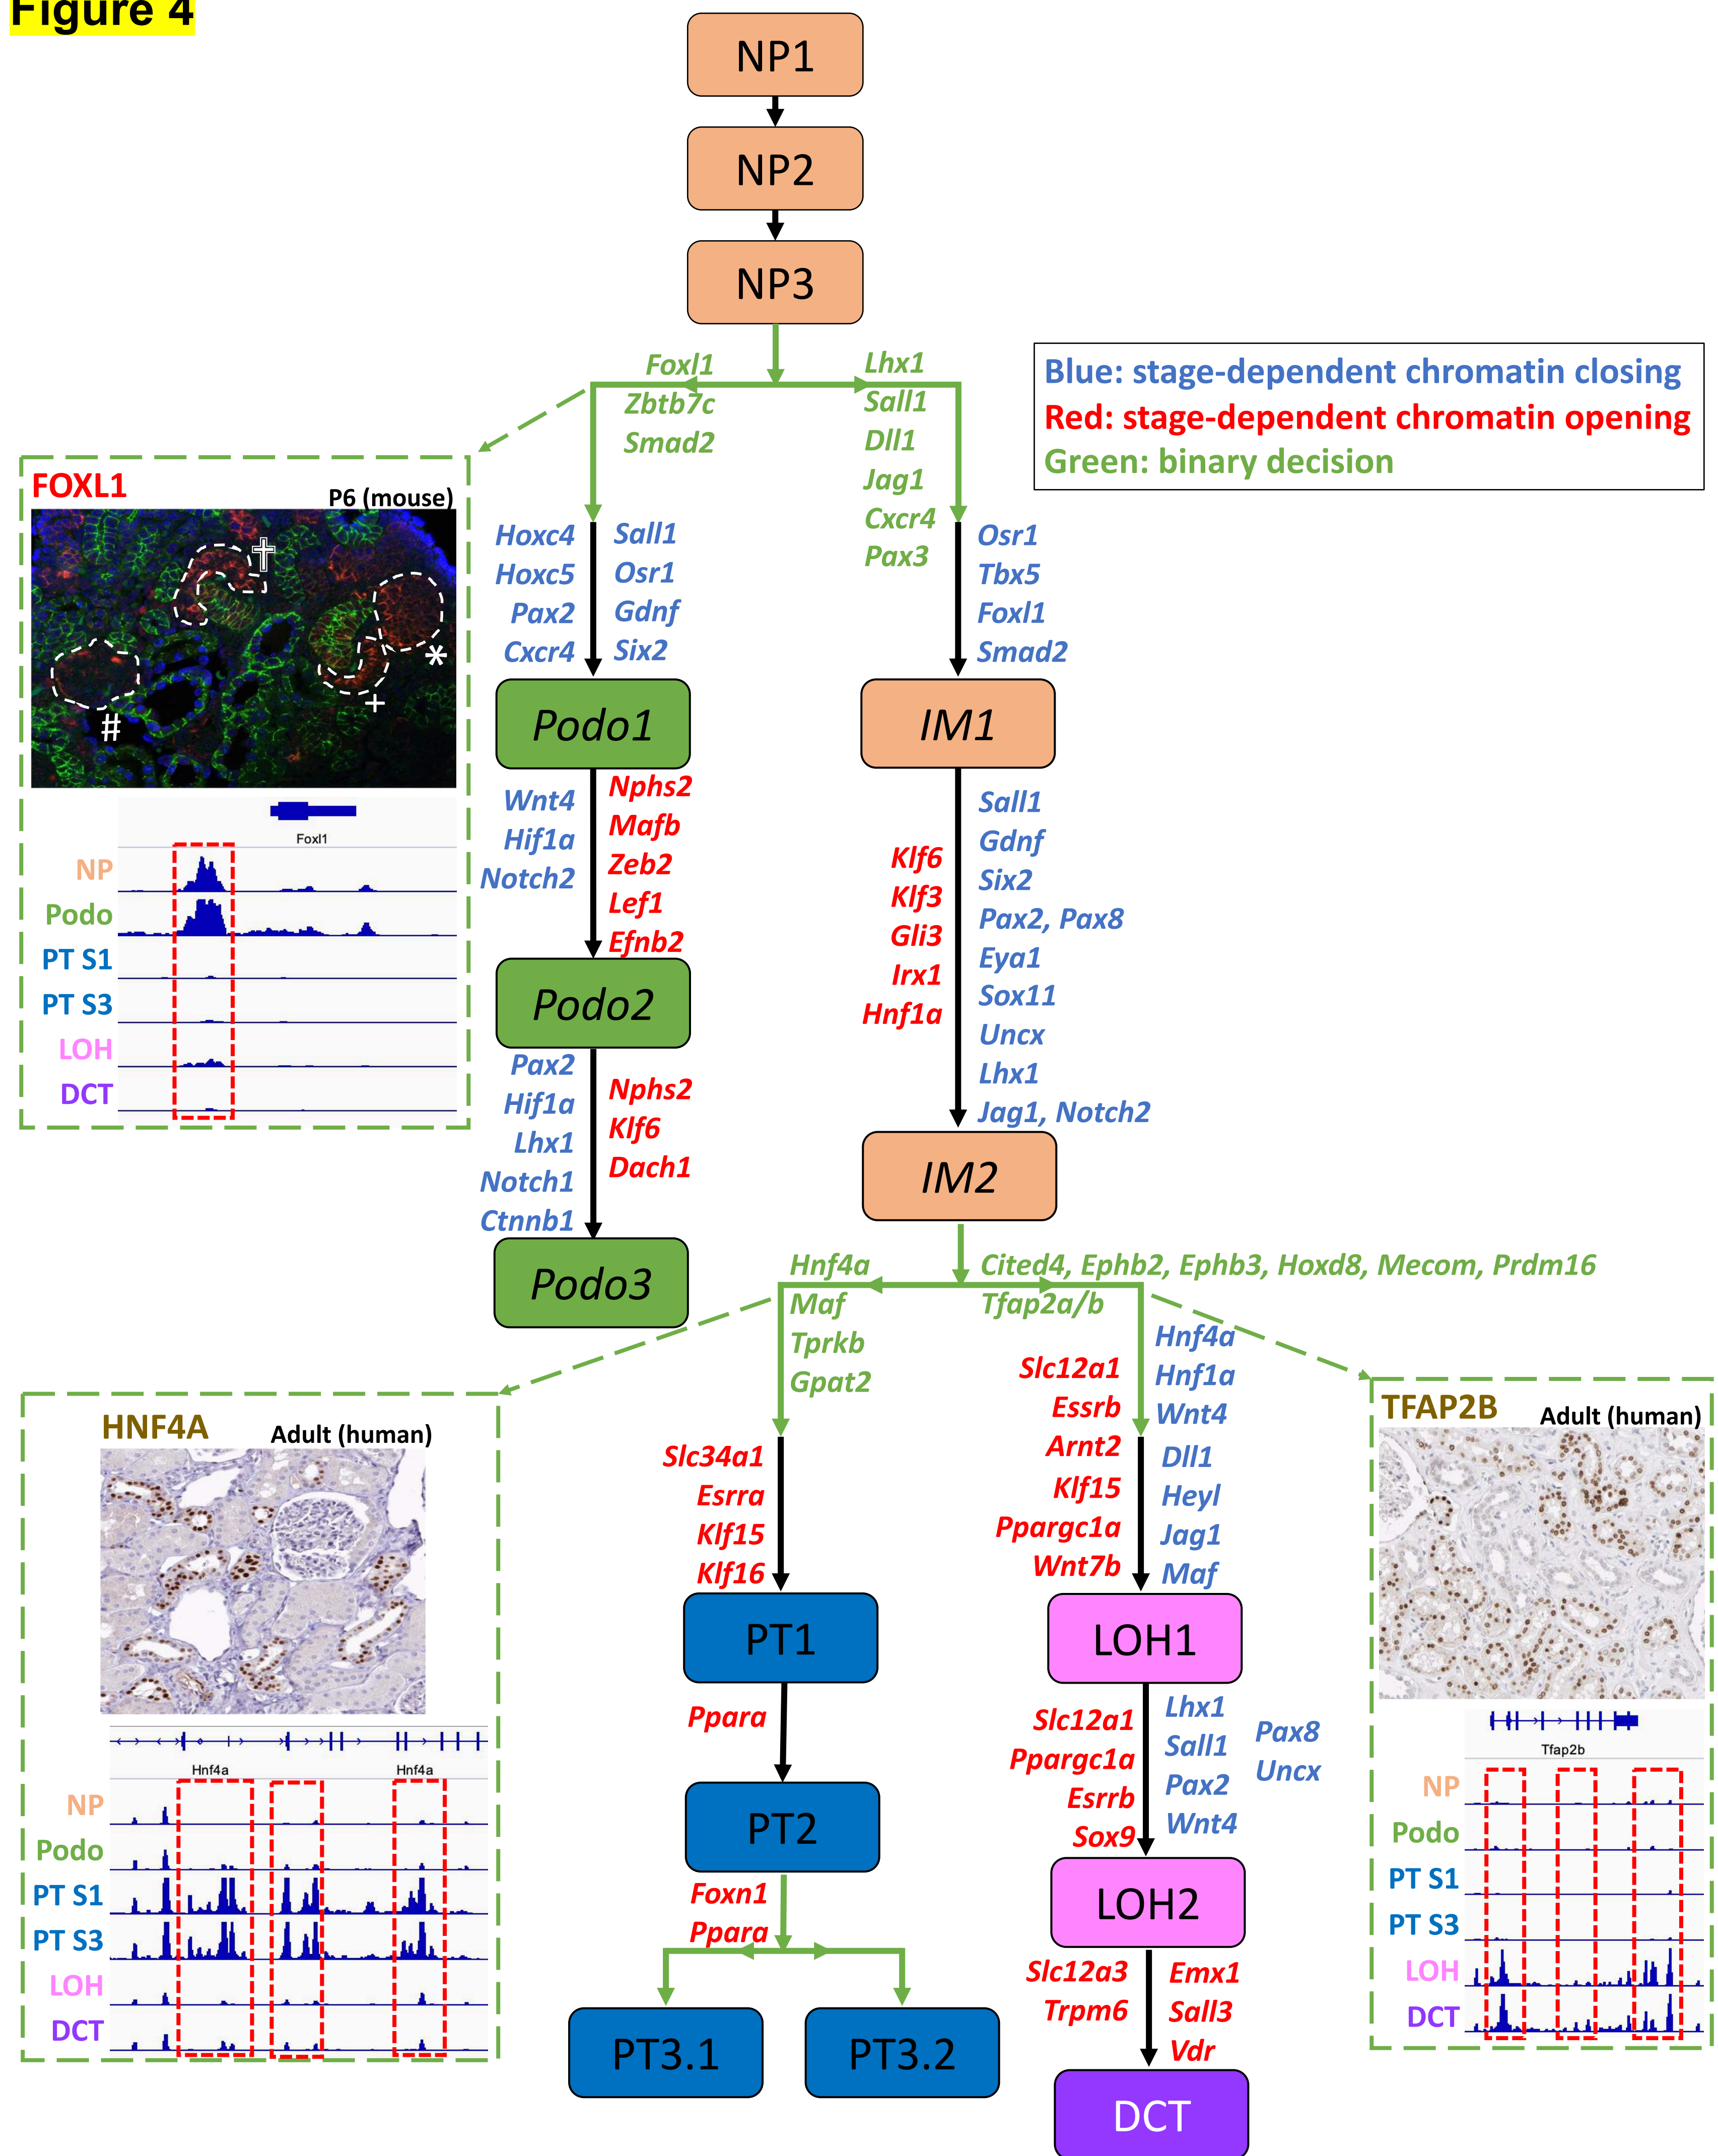

**Figure 5**

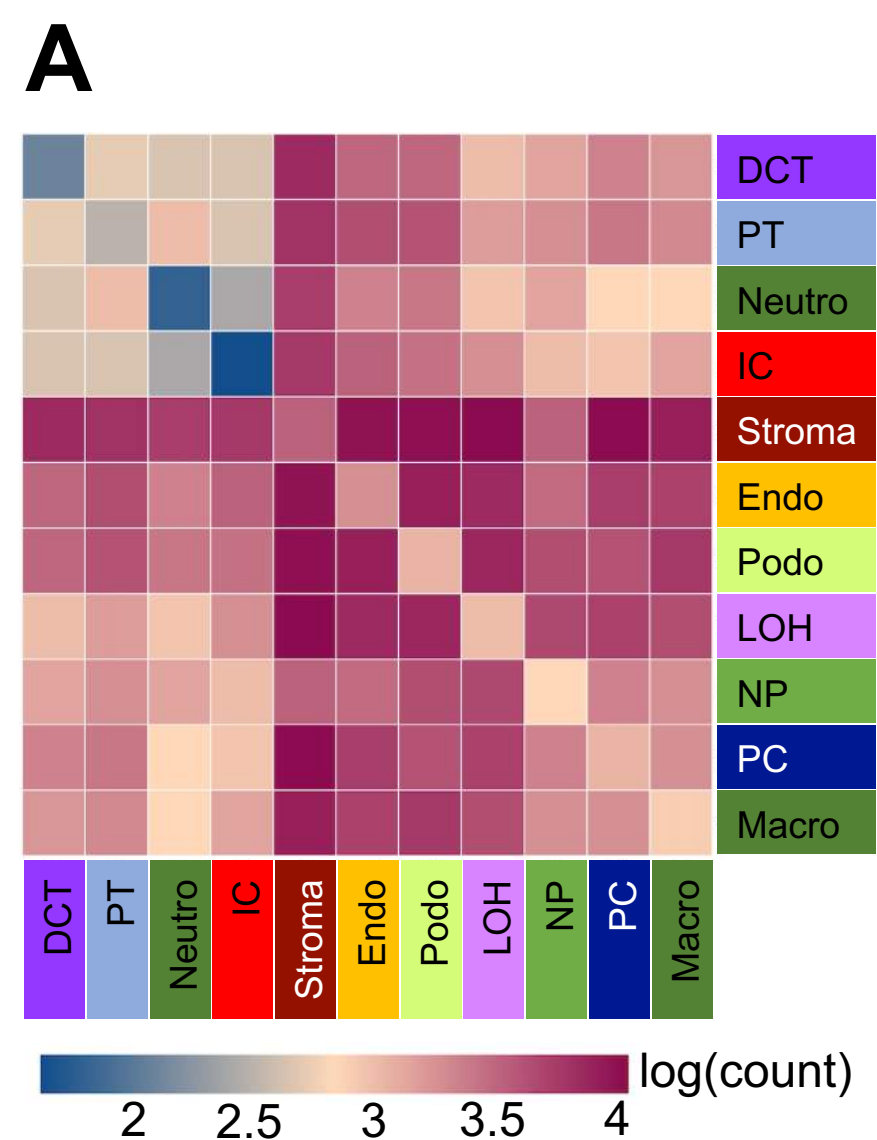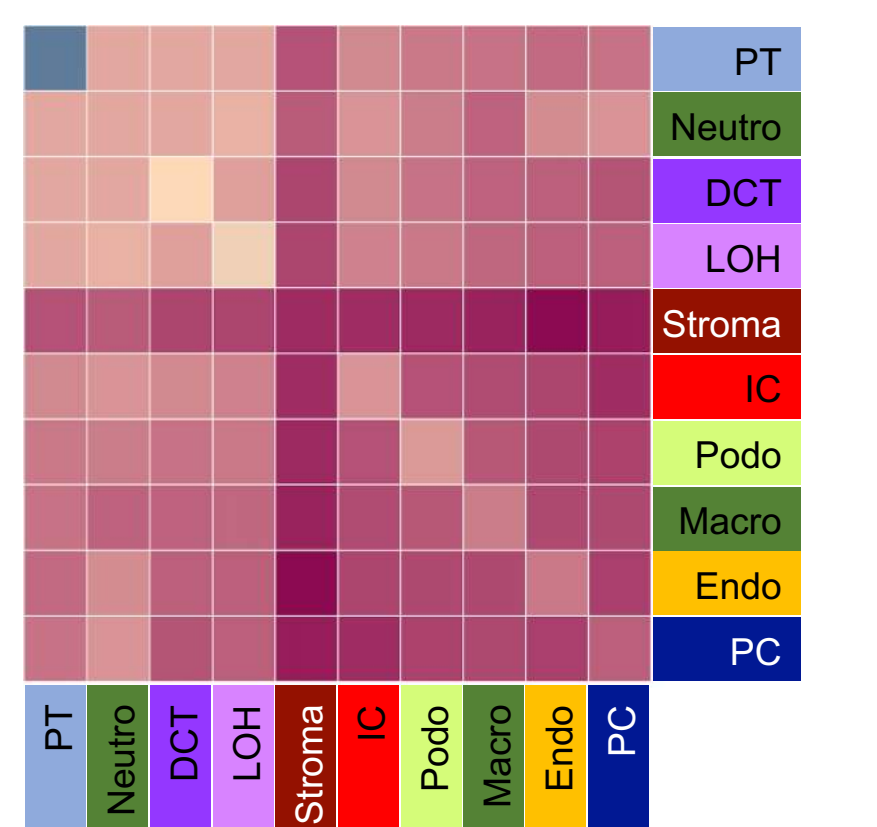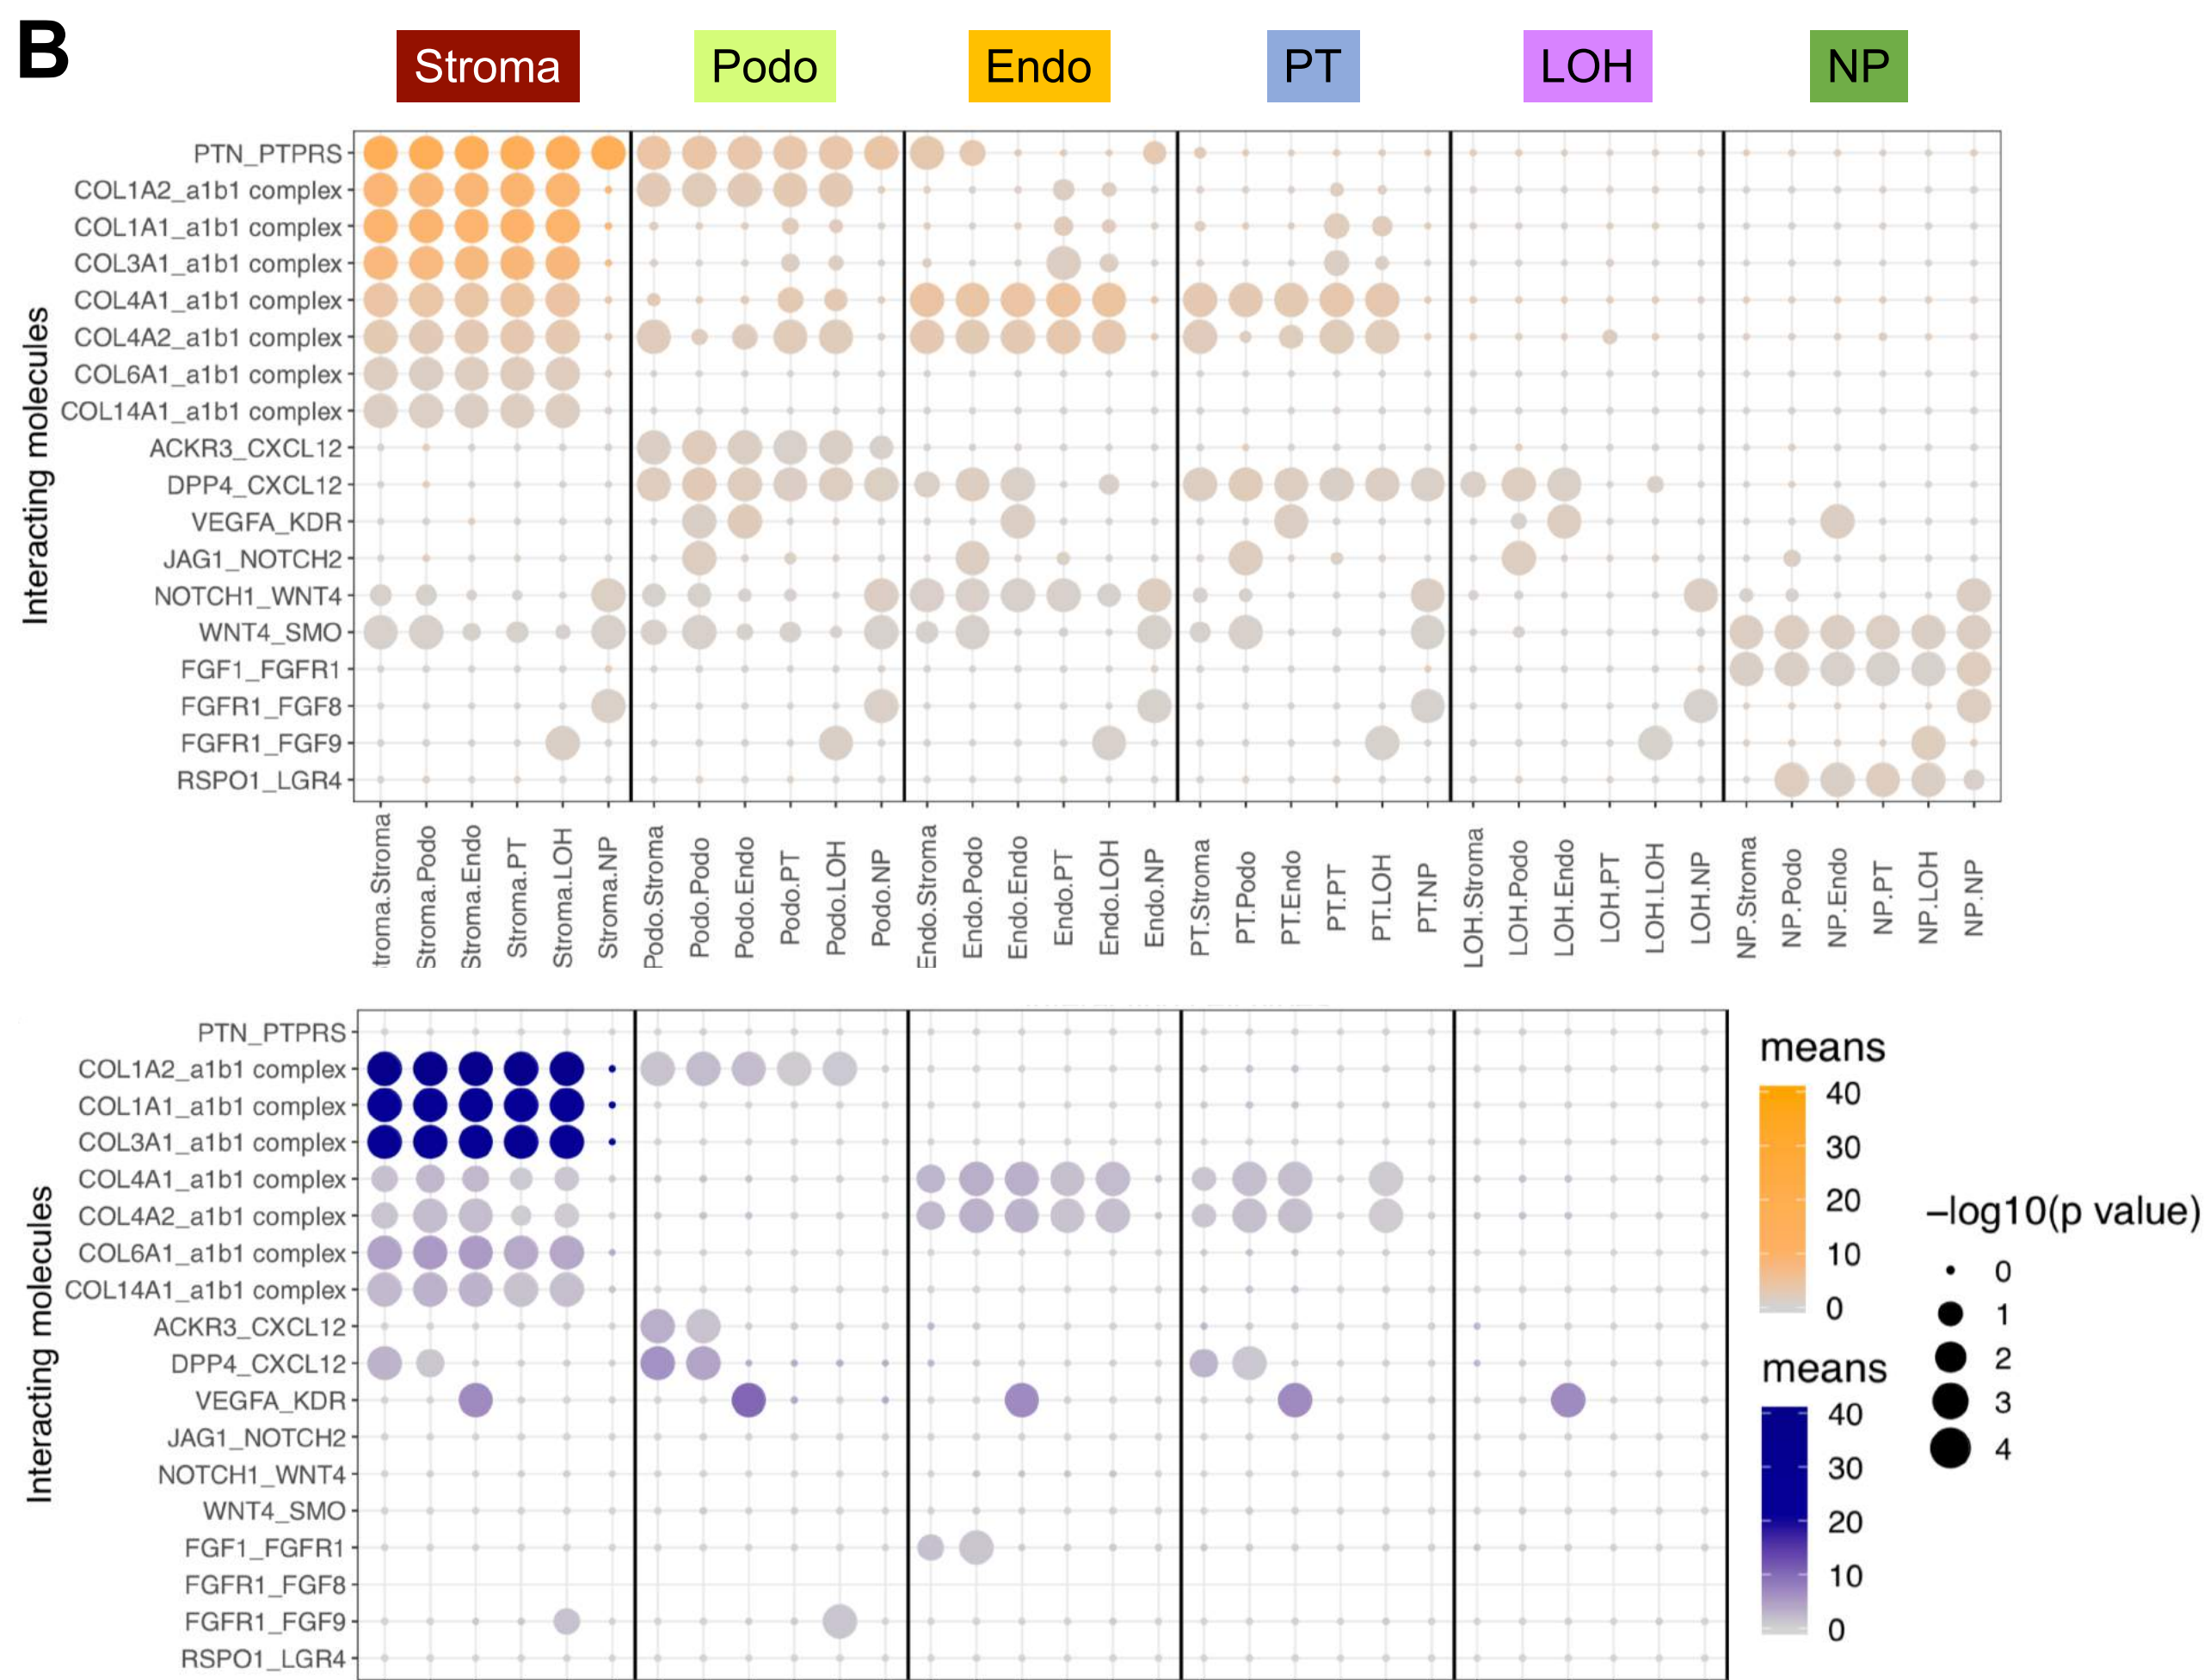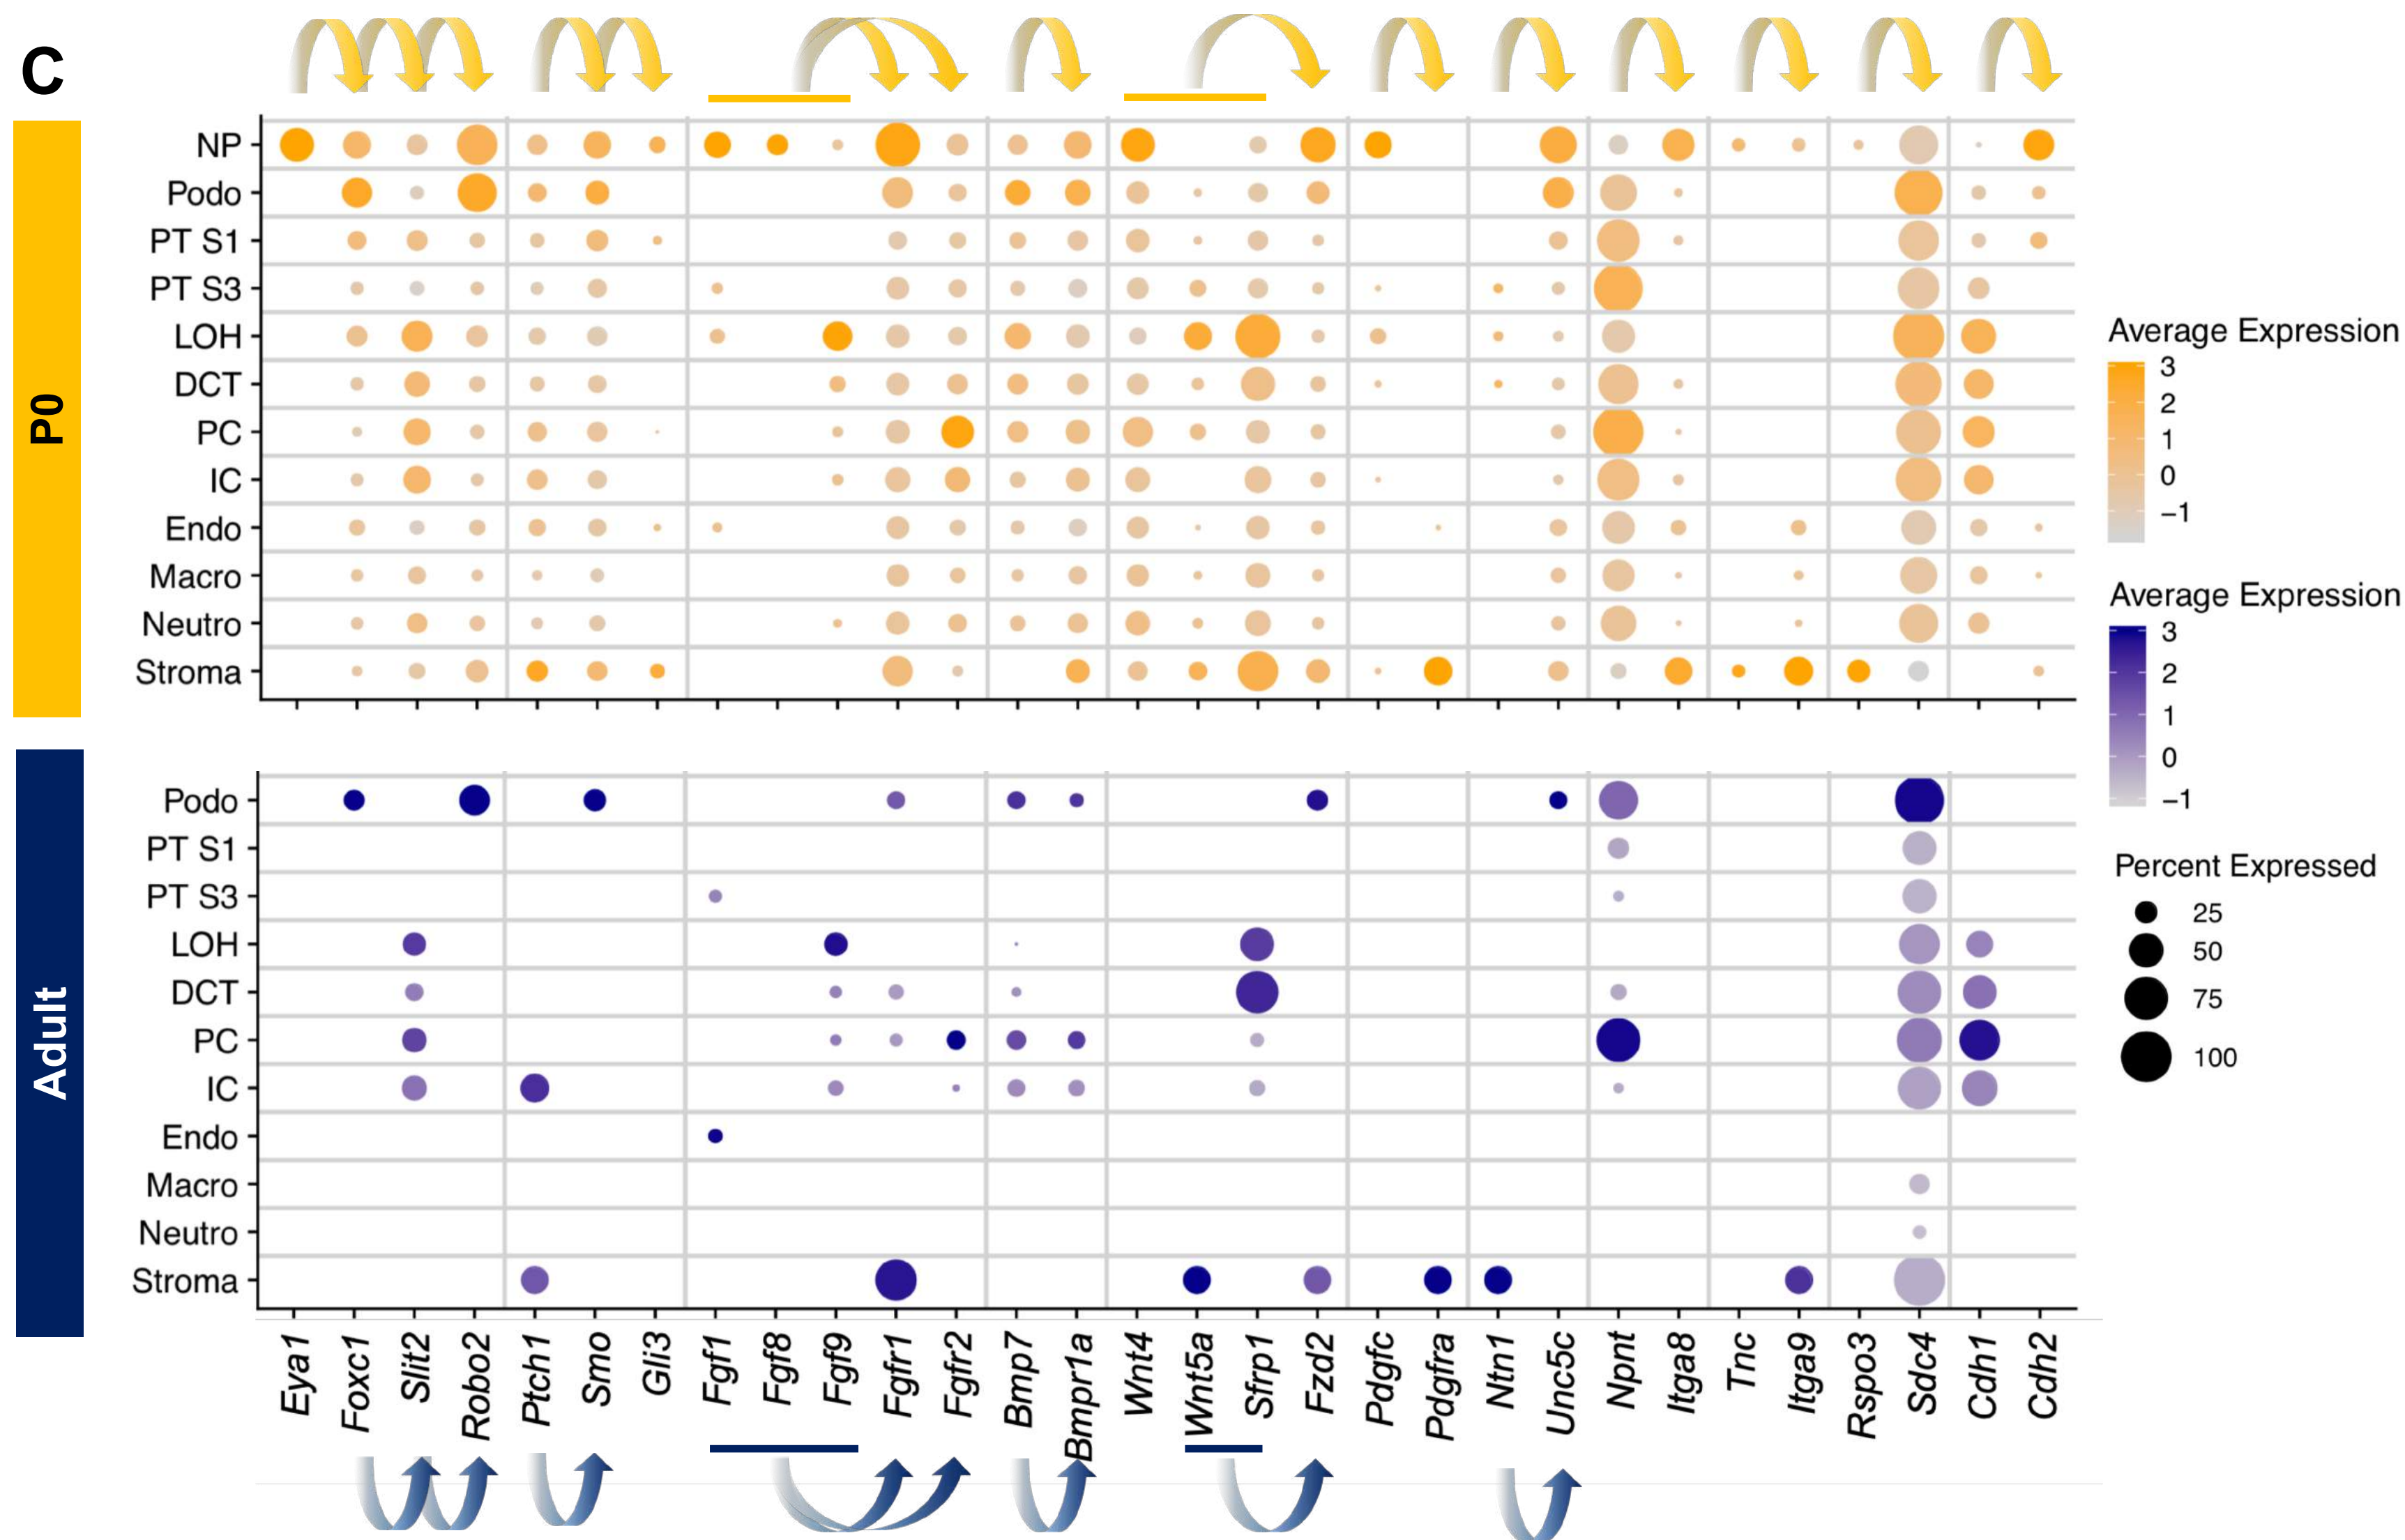

**Figure 6**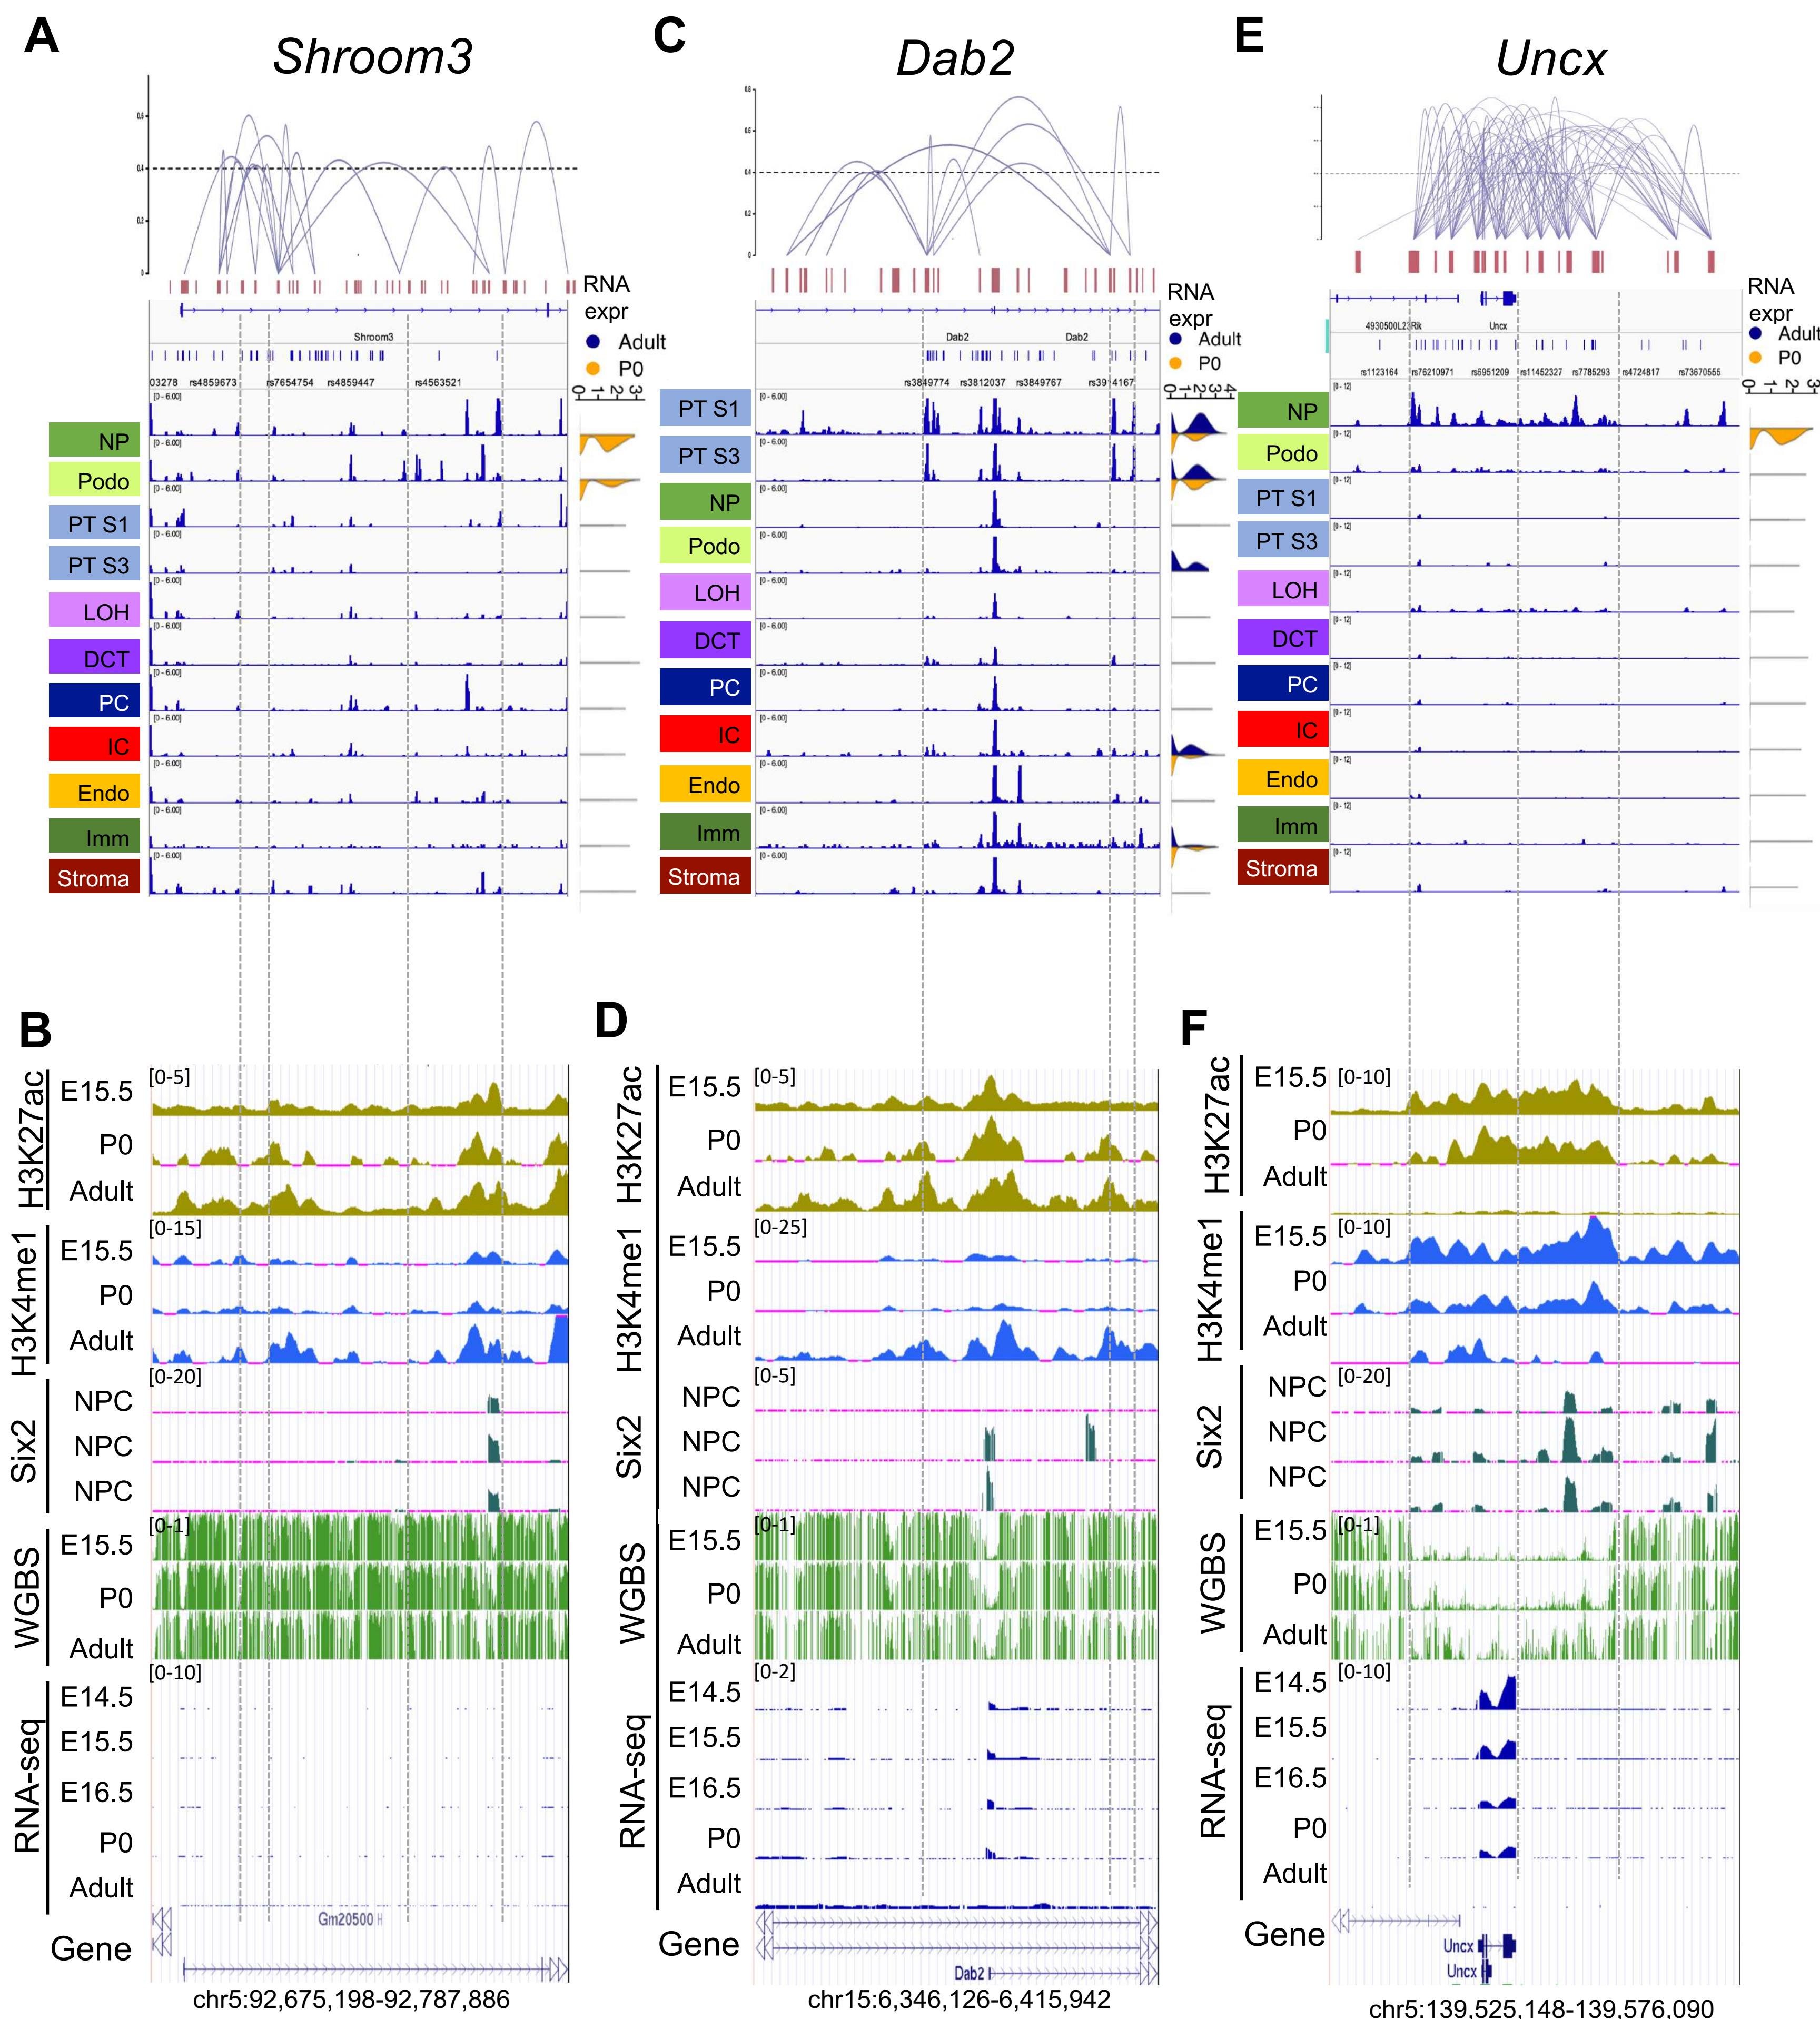

Source: https://www.biorxiv.org/content/10.1101/2020.05.24.113910v1.full.pdf
